# Supplementary material for: B(C6F5)3-catalyzed three-component tandem reaction to construct novel polycyclic quinone derivatives: synthesis of a carbonate salt chromogenic chemosensor
Source: Royal Society of Chemistry journal article supplement (doi:10.1039/d1qo01199e), 2021-01-01

## *Supporting Information*

### **B(C<sub>6</sub>F<sub>5</sub>)<sub>3</sub>-catalyzed three-component tandem reaction to construct novel polycyclic quinone derivatives: synthesis of a carbonate salts chromogenic chemosensor.**

Bei Wang,<sup>a, b, c</sup> Hong Xu,<sup>a, b, c</sup> Hua Zhang,<sup>a, b, c</sup> Guo-Ming Zhang,<sup>a, b, c</sup> Fu-Yu Li,<sup>a, b, c</sup> Shuai He,<sup>d</sup> Zhi-  
Chuan Shi,<sup>d</sup> Ji- Yu Wang<sup>\*, a, b</sup>

<sup>a</sup> *Asymmetric Synthesis and Chiraltechnology Key Laboratory of Sichuan Province, Chengdu Institute of Organic Chemistry, Chinese Academy of Sciences, Chengdu 610041, P. R. China.*

<sup>b</sup> *Department of Chemistry, Xihua University, China*

<sup>c</sup> *University of Chinese Academy of Sciences, Beijing 100049, P. R. China.*

<sup>d</sup> *Southwest Minzu University, Chengdu 610041, PR China.*

\*Corresponding author: Ji-Yu Wang

Email: Jiyuwang@cioc.ac.cn.

## Table of contents

|                                                                                                             |           |
|-------------------------------------------------------------------------------------------------------------|-----------|
| <b>1 General information</b> .....                                                                          | <b>3</b>  |
| <b>2 Experiment section</b> .....                                                                           | <b>3</b>  |
| 2.1 Condition optimizations .....                                                                           | 3         |
| 2.2 Experimental procedures.....                                                                            | 6         |
| 2.3 Control experiments .....                                                                               | 9         |
| <b>3 Characterization data of products</b> .....                                                            | <b>10</b> |
| 3.1 Photophysical characterization data.....                                                                | 10        |
| 3.2 UV spectrum of compound <b>4</b> and <b>5</b> .....                                                     | 13        |
| 3.3 Fluorescence emission spectrum.....                                                                     | 14        |
| 3.4 The UV/VIS and fluorescence emission spectrum of the interaction of metal salts<br>with <b>4j</b> ..... | 15        |
| 3.5 Physical datas of products .....                                                                        | 22        |
| 3.6 X-Ray Diffraction Analysis .....                                                                        | 40        |
| <b>4 Reference</b> .....                                                                                    | <b>55</b> |
| <b>5 NMR spectra of products</b> .....                                                                      | <b>56</b> |

## 1 General information

Unless specifically noted, all reagents were purchased commercially without further purification. Analytical thin-layer chromatography (TLC) was performed on Silica Gel GF-254 plates and detected by UV light (254 nm). Column chromatography was carried out using silica gel (particle size 200-300 mesh).  $^1\text{H-NMR}$  and  $^{13}\text{C-NMR}$   $^{19}\text{F-NMR}$  were recorded by 400 MHz, 101 MHz and 376 MHz Bruker spectrometer in  $\text{CDCl}_3$  or  $\text{DMSO-d}_6$ . NMR data are reported according to the following order: (1) chemical shifts were quoted in parts per million (ppm) referenced to deuterated solvent; (2) peak splitting patterns were described using s (singlet), d (doublet), t (triplet), dd (doublet of doublet), td (triplet of doublet), ddd (doublet of doublet of doublet), m (multiplet); (3) coupling constants (J) were reported in Hertz (Hz). HRMS were undertaken on a Thermo Scientific LTQ Orbitrap XL instrument. Melting points were tested with Hanon MP430. UV spectrums were tested with UNICO 4802 UV-VIS double beam spectrophotometer. The fluorescence emission spectrums were tested with 970CRT/XP Fluorescence spectrophotometer.

## 2 Experiment section

### 2.1 Condition optimizations

**Table S1** Screening of catalysts <sup>a, b</sup>

| Entry | Catalyst (mol %)                                | Yield (%) |
|-------|-------------------------------------------------|-----------|
| 1     | $\text{B}(\text{C}_6\text{F}_5)_3$ (5)          | 65        |
| 2     | $\text{C}_6\text{H}_5\text{B}(\text{OH})_2$ (5) | 46        |
| 3     | $\text{BF}_3 \cdot \text{OEt}_2$ (5)            | trace     |

|    |                                                     |                 |
|----|-----------------------------------------------------|-----------------|
| 4  | Fe(acac) <sub>3</sub> (5)                           | ND <sup>c</sup> |
| 5  | Ni(OTf) <sub>2</sub> (5)                            | 57              |
| 6  | CoCl <sub>2</sub> (5)                               | 54              |
| 7  | Cu(OTf) <sub>2</sub> (5)                            | 41              |
| 8  | TsOH. H <sub>2</sub> O                              | 32              |
| 9  | HCl                                                 | 50              |
| 10 | B(C <sub>6</sub> F <sub>5</sub> ) <sub>3</sub> (3)  | 53              |
| 11 | B(C <sub>6</sub> F <sub>5</sub> ) <sub>3</sub> (10) | 68              |

Reaction conditions: <sup>a</sup> 1,4-naphthoquinone **1** (0.3 mmol, 1 equiv), 1-methylindole **2** (0.3 mmol, 1 equiv), N-phenylmaleimide **3** (0.3 mmol, 1 equiv), catalyst (5 mol %), and CH<sub>3</sub>CN (3 mL) were stirred under sealed tube at 80 °C for 24 h. <sup>b</sup> Isolated yield. <sup>c</sup> ND: not detected.

**Table S2** Screening of Bases <sup>a, b</sup>

| Entry | Catalyst (mol %)                                   | Base (mol %)           | Yield (%) |
|-------|----------------------------------------------------|------------------------|-----------|
| 1     | B(C <sub>6</sub> F <sub>5</sub> ) <sub>3</sub> (5) | Me <sub>3</sub> P (5)  | 28        |
| 2     | B(C <sub>6</sub> F <sub>5</sub> ) <sub>3</sub> (5) | Ph <sub>3</sub> P (5)  | 39        |
| 3     | B(C <sub>6</sub> F <sub>5</sub> ) <sub>3</sub> (5) | Ph <sub>2</sub> PH (5) | 51        |
| 4     | B(C <sub>6</sub> F <sub>5</sub> ) <sub>3</sub> (5) | P(Cy) <sub>3</sub> (5) | trace     |
| 5     | B(C <sub>6</sub> F <sub>5</sub> ) <sub>3</sub> (5) | DBU (5)                | trace     |
| 6     | B(C <sub>6</sub> F <sub>5</sub> ) <sub>3</sub> (5) | DABCO (5)              | trace     |
| 7     | B(C <sub>6</sub> F <sub>5</sub> ) <sub>3</sub> (5) | TEMP (5)               | 35        |

Reaction conditions: <sup>a</sup> 1,4-naphthoquinone **1** (0.3 mmol, 1 equiv), 1-methylindole **2** (0.3 mmol, 1 equiv), N-phenylmaleimide **3** (0.3 mmol, 1 equiv), B(C<sub>6</sub>F<sub>5</sub>)<sub>3</sub> (5 mol %), base (5 mol %) and CH<sub>3</sub>CN (3 mL) were stirred under sealed tube at 80 °C for 24 h. <sup>b</sup> Isolated yield.

**Table S3** Screening of temperature and time <sup>a, b</sup>

| Entry | Catalyst (mol %)                                   | T (°C) | t (h) | Yield (%) |
|-------|----------------------------------------------------|--------|-------|-----------|
| 1     | B(C <sub>6</sub> F <sub>5</sub> ) <sub>3</sub> (5) | rt     | 24    | trace     |
| 2     | B(C <sub>6</sub> F <sub>5</sub> ) <sub>3</sub> (5) | 30     | 24    | 19        |
| 3     | B(C <sub>6</sub> F <sub>5</sub> ) <sub>3</sub> (5) | 50     | 24    | 47        |
| 4     | B(C <sub>6</sub> F <sub>5</sub> ) <sub>3</sub> (5) | 100    | 24    | 78        |
| 5     | B(C <sub>6</sub> F <sub>5</sub> ) <sub>3</sub> (5) | 120    | 24    | 77        |
| 6     | B(C <sub>6</sub> F <sub>5</sub> ) <sub>3</sub> (5) | 100    | 20    | 68        |
| 7     | B(C <sub>6</sub> F <sub>5</sub> ) <sub>3</sub> (5) | 100    | 16    | 63        |

Reaction conditions: <sup>a</sup> 1,4-naphthoquinone **1** (0.3 mmol, 1 equiv), 1-methylindole **2** (0.3 mmol, 1 equiv), N-phenylmaleimide **3** (0.3 mmol, 1 equiv), B(C<sub>6</sub>F<sub>5</sub>)<sub>3</sub> (5 mol %), and CH<sub>3</sub>CN (3 mL) were stirred under sealed tube. <sup>b</sup> Isolated yield.

**Table S4** Screening of solvents <sup>a, b</sup>

| Entry | Catalyst (mol %)                                   | Solvent (0.1M)                    | T (°C) | t (h) | Yield (%) |
|-------|----------------------------------------------------|-----------------------------------|--------|-------|-----------|
| 1     | B(C <sub>6</sub> F <sub>5</sub> ) <sub>3</sub> (5) | CH <sub>3</sub> CN                | 100    | 24    | 78        |
| 2     | B(C <sub>6</sub> F <sub>5</sub> ) <sub>3</sub> (5) | H <sub>2</sub> O                  | 100    | 24    | 37        |
| 3     | B(C <sub>6</sub> F <sub>5</sub> ) <sub>3</sub> (5) | EtOH                              | 100    | 24    | 53        |
| 4     | B(C <sub>6</sub> F <sub>5</sub> ) <sub>3</sub> (5) | THF                               | 100    | 24    | 34        |
| 5     | B(C <sub>6</sub> F <sub>5</sub> ) <sub>3</sub> (5) | DCE                               | 100    | 24    | 22        |
| 6     | B(C <sub>6</sub> F <sub>5</sub> ) <sub>3</sub> (5) | DMF                               | 100    | 24    | 60        |
| 7     | B(C <sub>6</sub> F <sub>5</sub> ) <sub>3</sub> (5) | (CH <sub>2</sub> OH) <sub>2</sub> | 100    | 24    | 65        |
| 8     | B(C <sub>6</sub> F <sub>5</sub> ) <sub>3</sub> (5) | toluene                           | 100    | 24    | 43        |

Reaction conditions: <sup>a</sup> 1,4-naphthoquinone **1** (0.3 mmol, 1 equiv), 1-methylindole **2** (0.3 mmol, 1 equiv), N-phenylmaleimide **3** (0.3 mmol, 1 equiv), B(C<sub>6</sub>F<sub>5</sub>)<sub>3</sub> (5 mol %), and solvent (3 mL) were stirred under sealed tube at 100 °C for 24 h. <sup>b</sup> Isolated yield.

## 2.2 Experimental procedures

### 2.2.1 The synthesis of compounds 4a-4r, 5a-5m

$B(C_6F_5)_3$  (5 mol % or 10 mol %) and  $CH_3CN$  (3 mL) were added to a sealed tube with quinones (0.3 mmol, 1 equiv), indoles **2** (0.3 mmol, 1 equiv), maleimides **3** (0.3 mmol, 1 equiv). Then, the sealed tube was stirred at 100-120 °C oil bath for 24 hours. After completing the reaction, the sealed tube was cooled to room temperature. Next, the mixture was washed with 5 mL of saturated brine, and extracted with 5 mL x 3 of dichloromethane (DCM). The organic layer was collected, dried over anhydrous  $MgSO_4$ , and concentrated under reduced pressure. Target compounds were separated successfully by column chromatography using PE/EA.

### 2.2.2 The synthesis of compounds 5n, 5o

$B(C_6F_5)_3$  (10 mol %) and  $CH_3CN$  (3 mL) were added to a sealed tube with 1,4-naphthoquinone **1a** (0.6 mmol, 2 equiv), 1-methylindole **2a** (0.6 mmol, 2 equiv), maleimides **3** (0.3 mmol, 1 equiv) and maleimides **3'** (0.3 mmol, 1 equiv). Then, the sealed tube was stirred at 100 °C oil bath for 24 hours. After completing the reaction, the sealed tube was cooled to room temperature. Next, the mixture was washed with 5 mL of saturated brine, and extracted with 5 mL x 3 of dichloromethane (DCM). The organic layer was collected, dried over anhydrous  $MgSO_4$ , and concentrated under reduced pressure. Target compounds were separated successfully by column chromatography using PE/EA.

### 2.2.3 The synthesis of substrates

#### 2.2.3.1 The synthesis of anthracene-1,4-dione (**1b**)

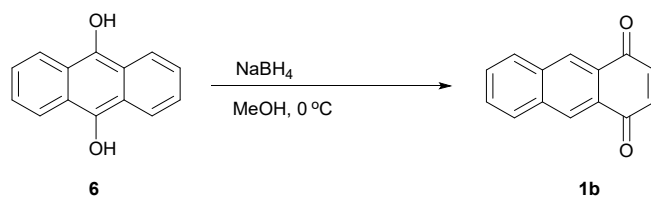

Compound **1b** was prepared according to literature report.<sup>[1]</sup> NaBH<sub>4</sub> (0.64g, 16.8 mmol) was added to a 0 °C methanol (20 mL) solution of quinizarin **6** (1g, 4.2 mmol) under Ar atmosphere and stirred for 1 h. Then, 12 mL 6 M HCl was slowly added to the solution at 0 °C. The solid was filtered and washed with water three times, Next, recrystallized from acetone/PE after drying to give anthracene-1,4-dione.

### 2.2.3.2 The synthesis of 6,7-dibromonaphthalene-1,4-dione (**1d**)

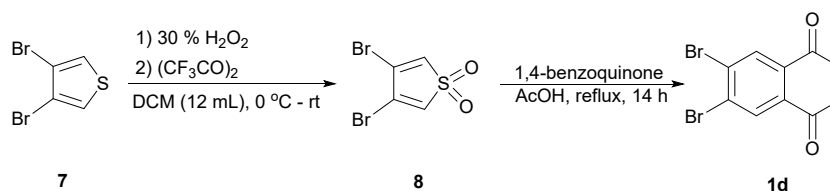

Compound **1d** was prepared according to literature report.<sup>[2]</sup> 30% H<sub>2</sub>O<sub>2</sub> (8 mL) was added to in a 100 mL flask and the mixture was stirred in ice bath. Then, (CF<sub>3</sub>CO)<sub>2</sub> (120 mmol, 12 equiv) was added dropwise to the mixture. 0.5 hours later, 3,4-dibromothiophene **7** (2.42 g, 10 mmol) in DCM (12 mL) was added all at once. The mixture was moved to room temperature and stirred for 2.5 hours. Saturated NaHCO<sub>3</sub> was slowly add to adjust the pH to around 9, extracted with 10 mL x 3 of dichloromethane (DCM), and dried over anhydrous MgSO<sub>4</sub>. The crude product **8** was obtained after removing solvent under reduced pressure, and proceeded to the next step without further purification. **8** (7.5 g, 6 mmol) and 1,4-benzoquinone (5.3 g, 10.8 mmol) were dissolved in 20 mL AcOH and refluxed for 14 hours. The solution was poured into water. The mixture was extracted with dichloromethane (3×15 mL). Then, the organic layer was washed with water three times, dried over anhydrous MgSO<sub>4</sub>, filtered, and then the solvent was completely removed. **1d** was purified by column

chromatography.

### 2.2.3.3 The synthesis of 1-(2-(2-(2-methoxyethoxy)ethoxy)ethyl)-1H-pyrrole-2,5-dione (3n)

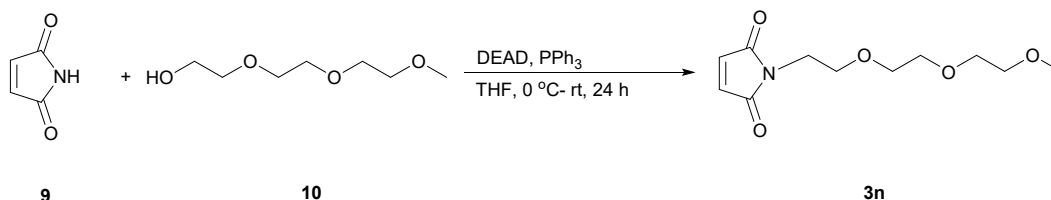

Compound **3n** was prepared according to Mitsunobu reaction and literature report.<sup>[3]</sup> PPh<sub>3</sub> (2.2 mmol) and DEAD (2.2 mmol) were added in a 50 mL flask with 10 mL THF and stirred for 20 min at 0 °C to give a yellow mixture. Next, Compound **10** (3 mmol) in 5 mL THF was added to the flask, and the mixture was stirred for 20 min. Finally, the maleimide (2 mmol) dissolved in 5 mL of THF was added. The mixture was moved to room temperature and stirred for 24 hours. After completion of the reaction, the mixture was washed with 10 mL of saturated brine, and extracted with ethyl acetate (3x10 mL), and dried over anhydrous MgSO<sub>4</sub>. Then the solvent was completely removed, and **3n** was purified by column chromatography.

### 2.2.3.4 The synthesis of N-aryl/N-alkyl maleimide derivatives

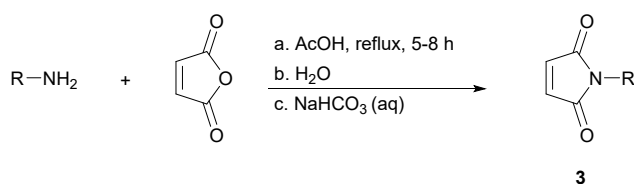

Compound **3** was prepared according to literature report.<sup>[4]</sup> Maleic anhydride (2.0 equiv.) and primary amine (5mmol.) were added in a 50 mL flask with 7.5 mL AcOH. The reaction mixture was refluxed for 6-8 h at 125 °C. Progress of the reaction was monitored by TLC, the mixture was moved to room temperature after completion of the reaction. Saturated NaHCO<sub>3</sub> was slowly add to adjust the pH to around 9, extracted with ethyl acetate (3x20 mL), and dried over anhydrous MgSO<sub>4</sub>. Then the solvent was



completely removed, and **3** was purified by column chromatography.

### 2.3 Control experiments

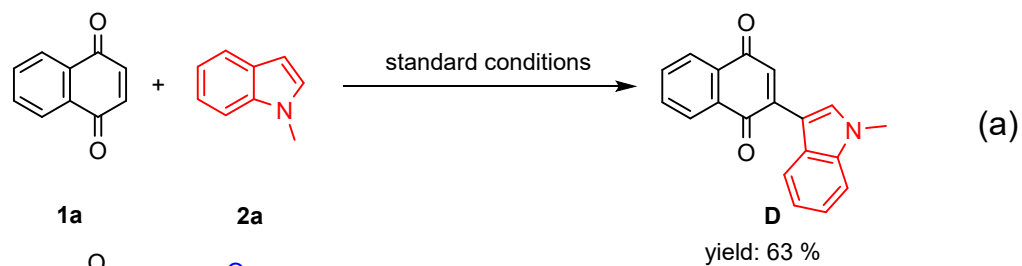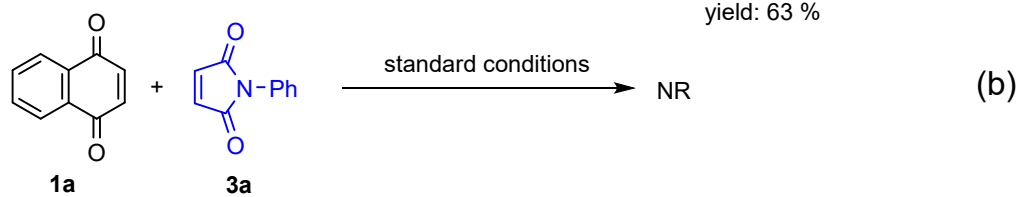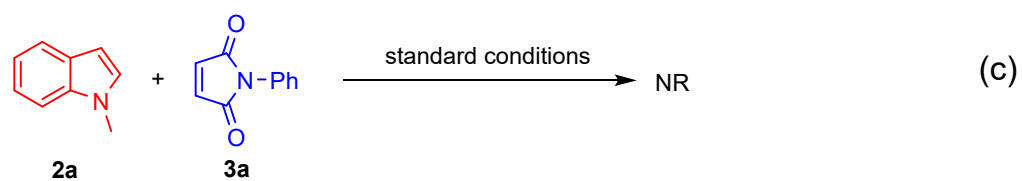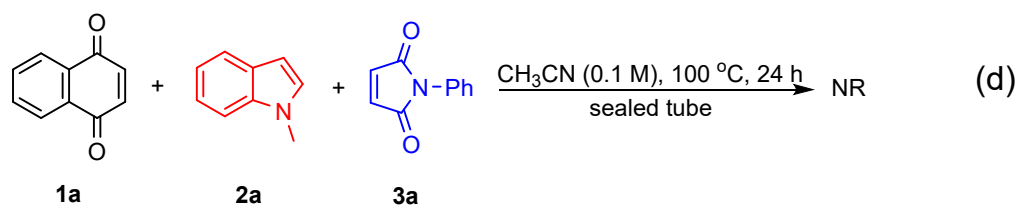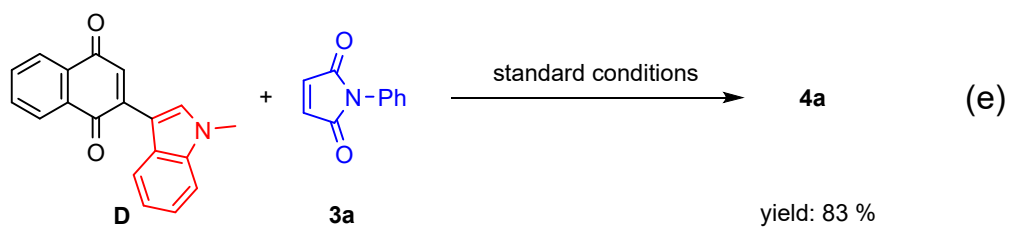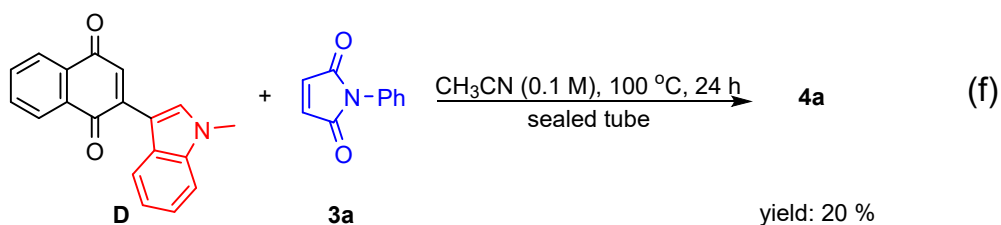

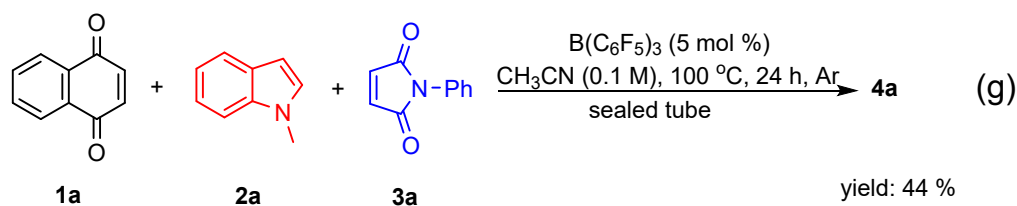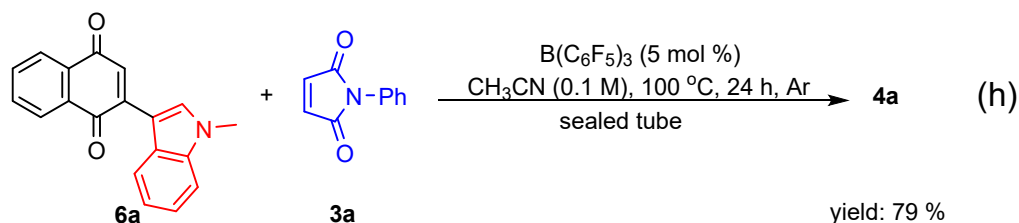

Scheme S1 Control experiments

### 3 Characterization data of products

#### 3.1 Photophysical characterization data

Measurement method: Rhodamine 6G ( $R_{6G}$ ) was selected as the standard to determine the relative quantum yield of the compound ( $\Phi=0.95$  in EtOH).<sup>[5]</sup> Prepare the ethyl acetate solution of compound **4** and **5** with a concentration of  $2.5 \times 10^{-6}$  mol/L, and prepare the ethanol solution of Rhodamine 6G with a concentration of  $2.5 \times 10^{-6}$  mol/L, measure the UV spectrum and fluorescence emission spectrum (Excitation wavelength at 530 nm) of the solution. The Photophysical characterization datas of compound **4** and **5** were shown in Table S5.

$$\Phi_F = \Phi_R \frac{A_R D_F \eta_F^2}{A_F D_R \eta_R^2}$$

Formula:<sup>[6]</sup>

$\Phi_F$ : the quantum yield of the compounds **4** and **5**;  $\Phi_R$ : the quantum yield of  $R_{6G}$ ;

$A_F$ : UV absorbance of the compounds **4** and **5**;  $A_R$ : UV absorbance of  $R_{6G}$ ;

$D_F$ : the integrated area of the fluorescence emission intensity of the compounds **4** and **5** under the excitation wavelength;  $D_R$ : the integrated area of the fluorescence emission intensity of R<sub>6G</sub> under the excitation wavelength;

$\eta_F$ : the refractive index of the solvent to be tested;  $\eta_R$ : the refractive index of the standard solvent.

The parameters setting for fluorescence emission spectrum: the scanning range of emission wavelength was from 350 nm to 750 nm, excitation wavelength at 530 nm, emission slit width was 10 nm, excitation slit width was 5 nm, the sensitivity was 1, the scanning speed was medium speed.

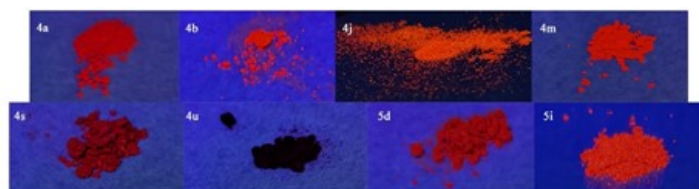

**Figure S1** Some compounds under 365nm UV

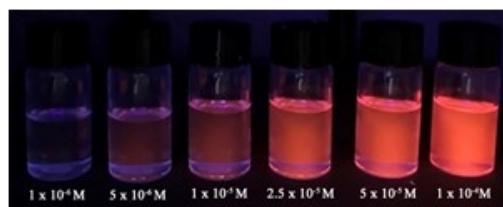

**Figure S2** Gradient concentration of **4a** under 365 nm UV (EA as solvent)

**Table S5** Photophysical characterization data of compound **4**

| compound  | $\lambda_{\max}$ (nm) | $\lambda_{\text{em}}$ (nm) | $\Phi_F$ |
|-----------|-----------------------|----------------------------|----------|
| <b>4a</b> | 530                   | 584                        | 0.56     |
| <b>4b</b> | 490                   | 563                        | 0.26     |
| <b>4c</b> | 510                   | 572                        | 0.83     |
| <b>4d</b> | 530                   | 584                        | 0.61     |
| <b>4f</b> | 530                   | 565                        | 0.72     |

|           |     |     |      |
|-----------|-----|-----|------|
| <b>4g</b> | 580 | -   | -    |
| <b>4h</b> | 540 | 592 | 0.47 |
| <b>4i</b> | 540 | 589 | 0.28 |
| <b>4j</b> | 495 | 530 | 0.98 |
| <b>4k</b> | 510 | 542 | 0.95 |
| <b>4l</b> | 530 | 577 | 0.63 |
| <b>4m</b> | 525 | 545 | 0.81 |
| <b>4n</b> | 515 | 564 | 0.85 |
| <b>4o</b> | 510 | 551 | 0.85 |
| <b>4p</b> | 540 | 596 | 0.29 |
| <b>4s</b> | 530 | 579 | 0.67 |
| <b>4t</b> | 560 | 614 | 0.05 |
| <b>4u</b> | 545 | 604 | 0.17 |
| <b>5a</b> | 530 | 586 | 0.6  |
| <b>5b</b> | 525 | 580 | 0.54 |
| <b>5c</b> | 530 | 581 | 0.61 |
| <b>5d</b> | 530 | 580 | 0.54 |
| <b>5e</b> | 530 | 583 | 0.58 |
| <b>5f</b> | 530 | 578 | 0.61 |
| <b>5g</b> | 530 | 583 | 0.54 |
| <b>5h</b> | 530 | 584 | 0.54 |
| <b>5i</b> | 530 | 582 | 0.57 |
| <b>5j</b> | 530 | 581 | 0.58 |
| <b>5k</b> | 520 | 587 | 0.49 |
| <b>5l</b> | 525 | 581 | 0.57 |
| <b>5m</b> | 530 | 578 | 0.65 |
| <b>5n</b> | 530 | 575 | 0.61 |
| <b>5o</b> | 530 | 576 | 0.61 |

### 3.2 UV spectrum of compound 4 and 5

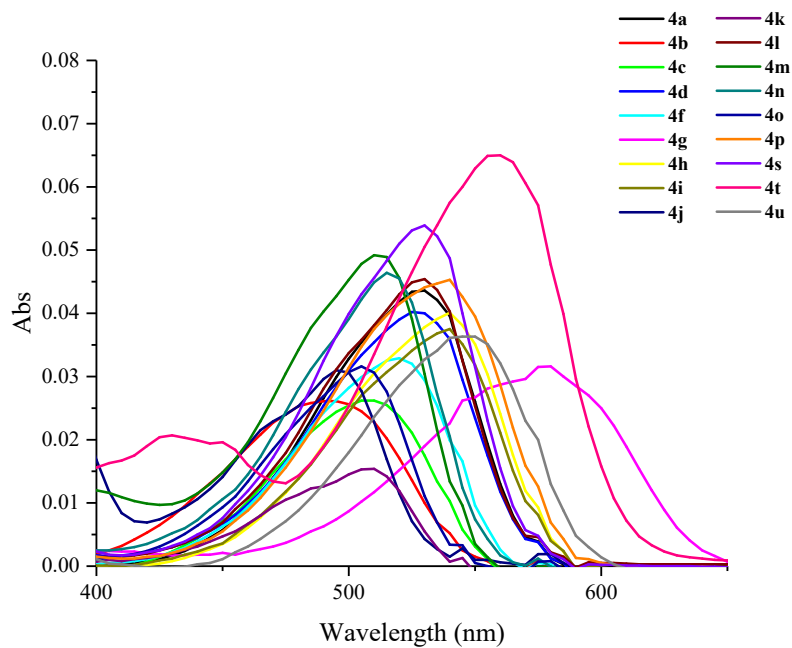

Figure S3 UV/VIS spectrum of compound 4

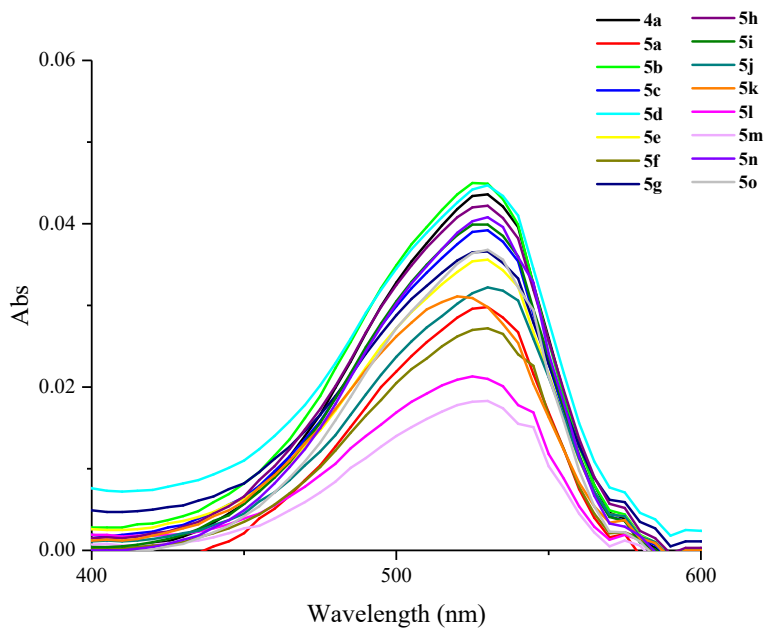

Figure S4 UV/VIS spectrum of compound 5

### 3.3 Fluorescence emission spectrum

The parameters setting for fluorescence emission spectrum: the scanning range of emission wavelength was from 350 nm to 750 nm, excitation wavelength was determined according to the fluorescence excitation spectrum of different compounds, emission slit width was 10 nm, excitation slit width was 5 nm, the sensitivity was 1, the scanning speed was medium speed.

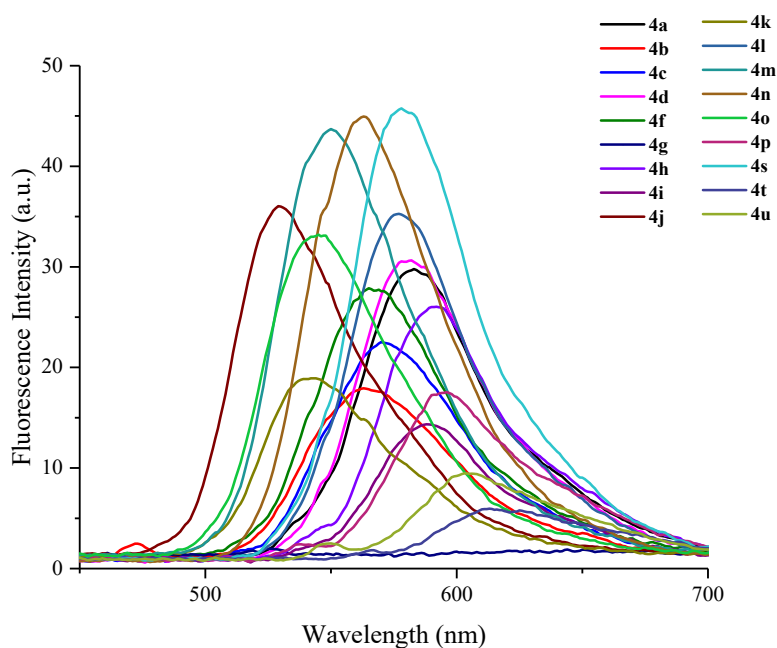

**Figure S5** Fluorescence emission spectrum of compound 4

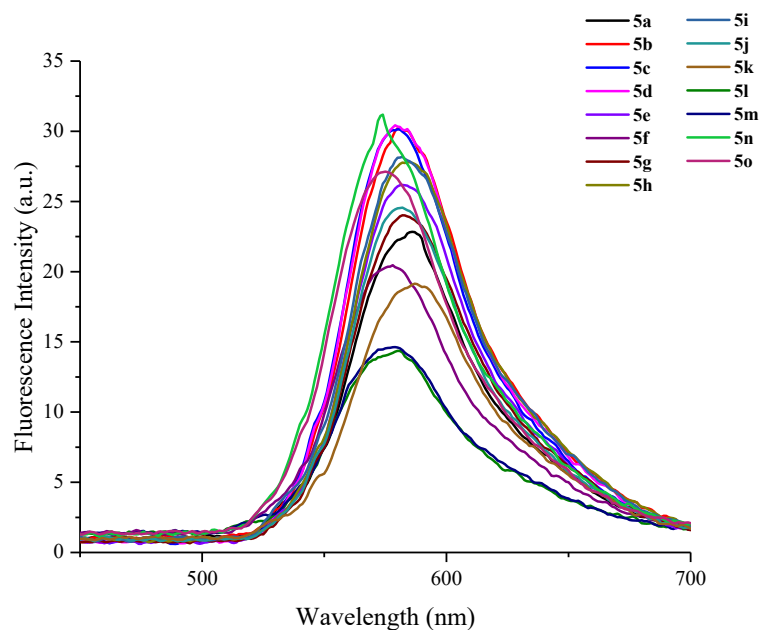

**Figure S6** Fluorescence emission spectrum of compound **5**

### **3.4 The UV/VIS and fluorescence emission spectrum of the interaction of metal salts with 4j**

The parameters setting for fluorescence emission spectrum: the scanning range of emission wavelength was from 350 nm to 750 nm, excitation wavelength at 516 nm, emission slit width was 10 nm, excitation slit width was 5 nm, the sensitivity was 1, the scanning speed was medium speed.

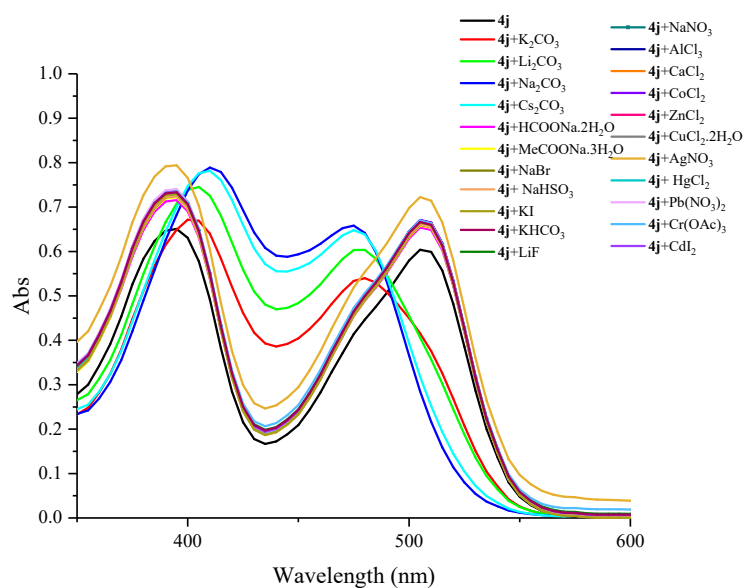

**Figure S7** The UV/VIS spectrum of the interaction of different metal salts with **4j** ( $C_{4j} = 5 \times 10^{-5}$  mol/L, DMF:H<sub>2</sub>O=5:1, n(**4j**) : n (salts) = 1:7)

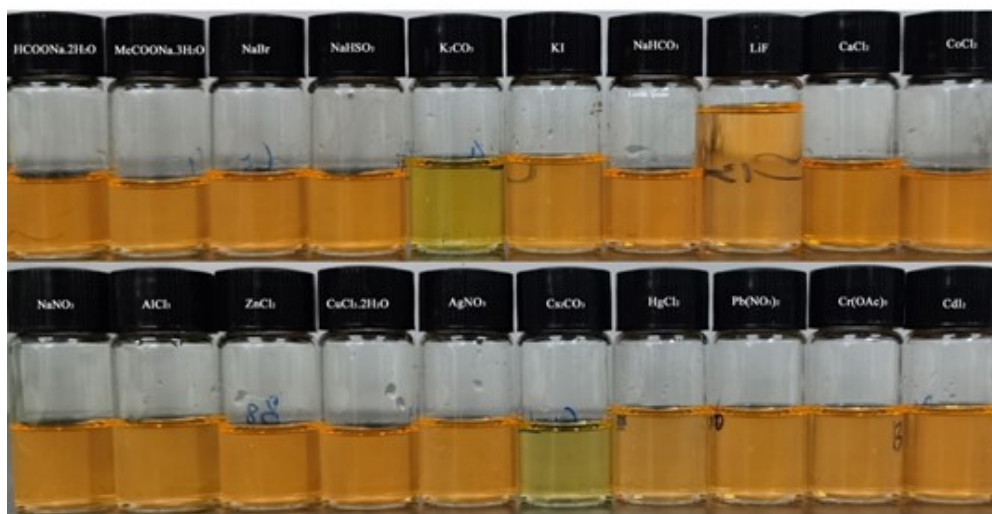

**Figure S8** The interaction of different metal salts with **4j**



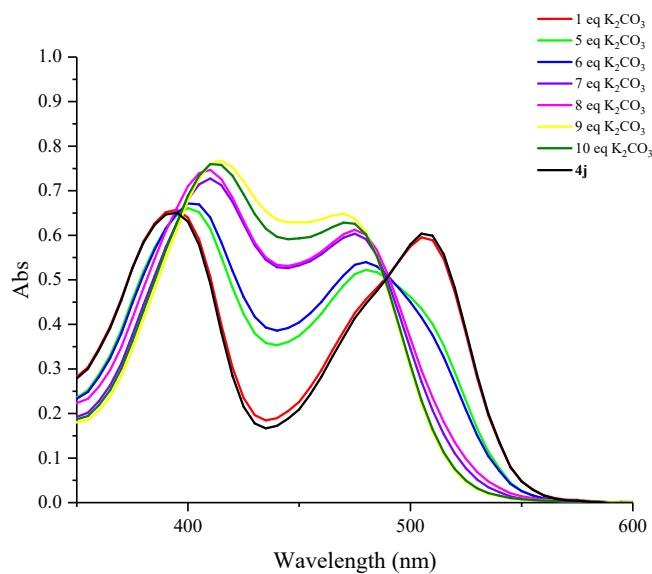

**Figure S9** The UV/VIS spectrum with different ratios of **4j** to  $\text{K}_2\text{CO}_3$  ( $C_{4j} = 5 \times 10^{-5}$  mol/L)

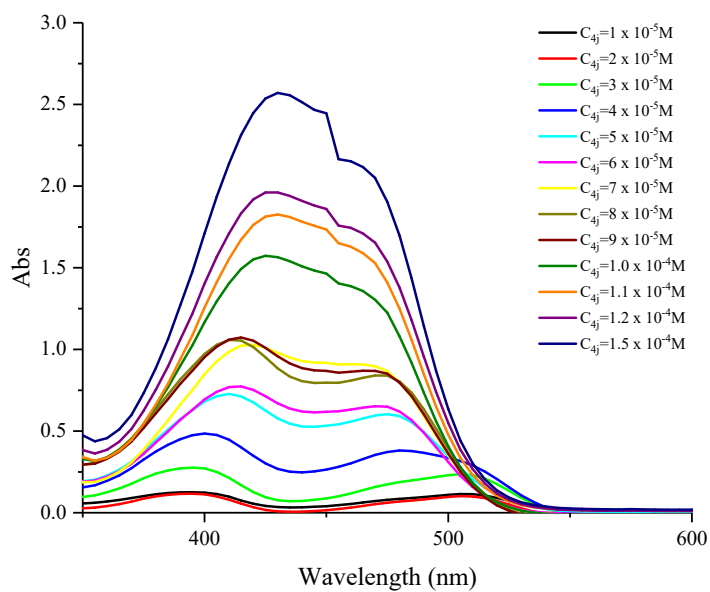

**Figure S10** The UV/VIS spectrum of gradient concentration of **4j** and  $\text{K}_2\text{CO}_3$  (DMF:H<sub>2</sub>O=5:1,  $n(\mathbf{4j}) : n(\text{K}_2\text{CO}_3) = 1:7$ )

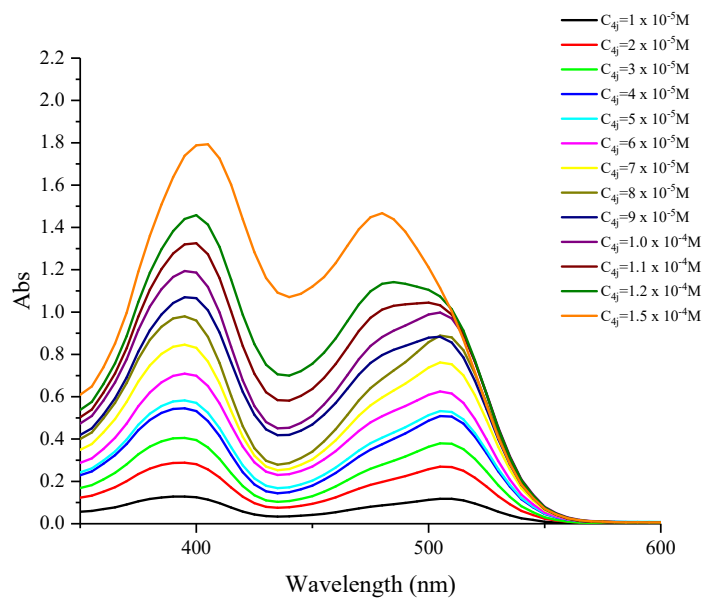

**Figure S11** The UV/VIS spectrum of gradient concentration of **4j** and Li<sub>2</sub>CO<sub>3</sub> (DMF:H<sub>2</sub>O=5:1, n(**4j**) : n(Li<sub>2</sub>CO<sub>3</sub>) = 1:7)

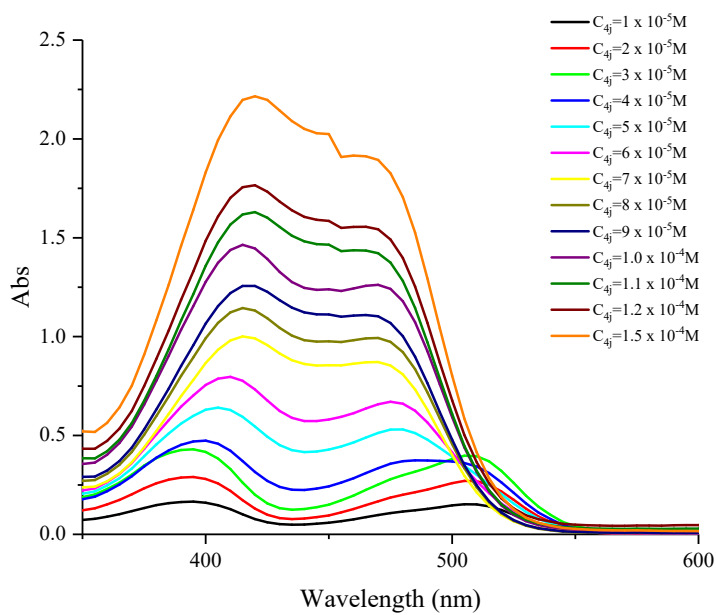

**Figure S12** The UV/VIS spectrum of gradient concentration of **4j** and Na<sub>2</sub>CO<sub>3</sub> (DMF:H<sub>2</sub>O=5:1, n(**4j**) : n(Na<sub>2</sub>CO<sub>3</sub>) = 1:7)

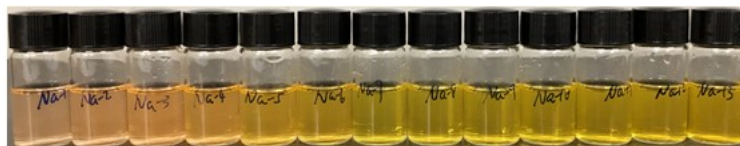

**Figure S13** The gradient concentration of **4j** and  $\text{Na}_2\text{CO}_3$

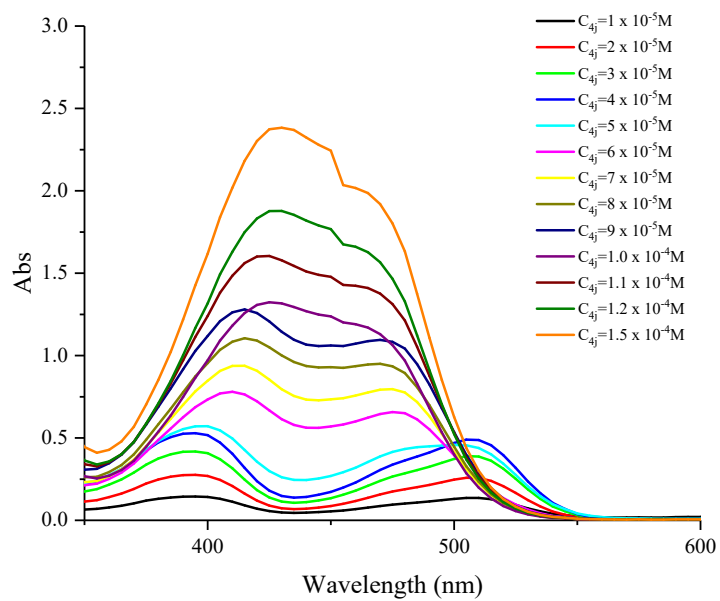

**Figure S14** the UV/VIS spectrum of gradient concentration of **4j** and  $\text{Cs}_2\text{CO}_3$  ( $\text{DMF}:\text{H}_2\text{O}=5:1$ ,  $n(\mathbf{4j}) : n(\text{Cs}_2\text{CO}_3) = 1:7$ )

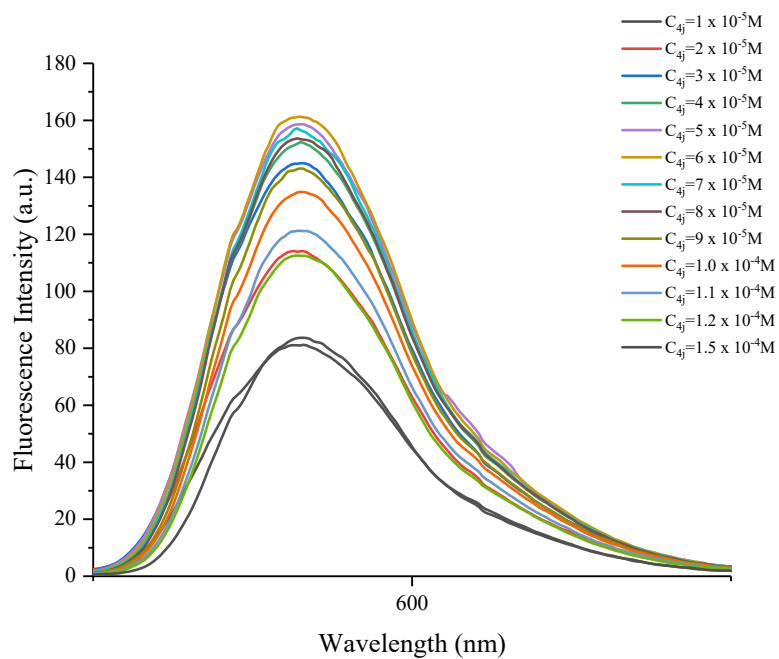

**Figure S15** The fluorescence emission spectrum of gradient concentration of **4j** (DMF:H<sub>2</sub>O=5:1)

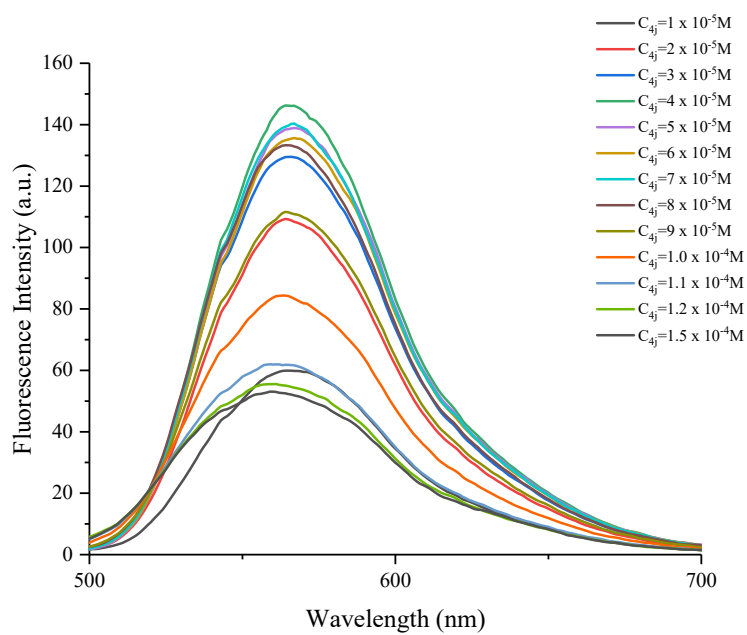

**Figure S16** The fluorescence emission spectrum of gradient concentration of **4j** and Li<sub>2</sub>CO<sub>3</sub> (DMF:H<sub>2</sub>O=5:1,  $n(\mathbf{4j}) : n(\text{Li}_2\text{CO}_3) = 1:7$ )

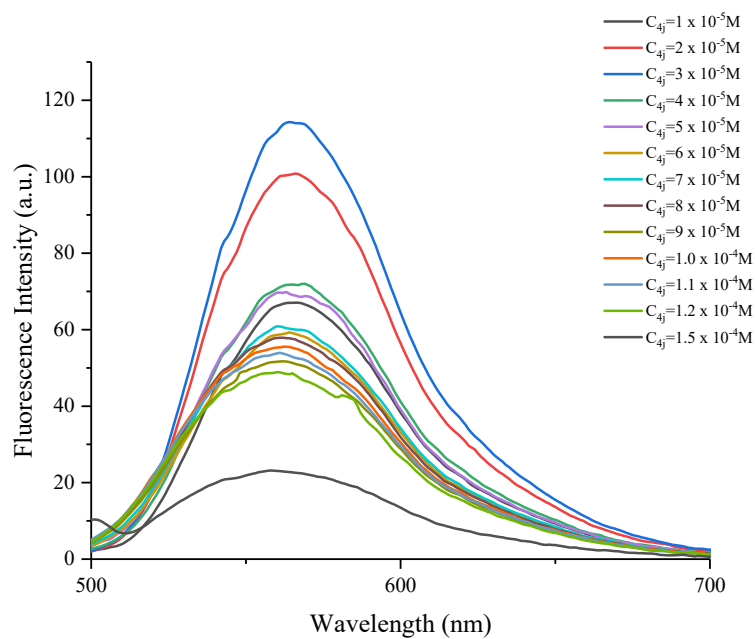

**Figure S17** The fluorescence emission spectrum of gradient concentration of **4j** and Na<sub>2</sub>CO<sub>3</sub> (DMF:H<sub>2</sub>O=5:1, n(**4j**) : n (Na<sub>2</sub>CO<sub>3</sub>) = 1:7)

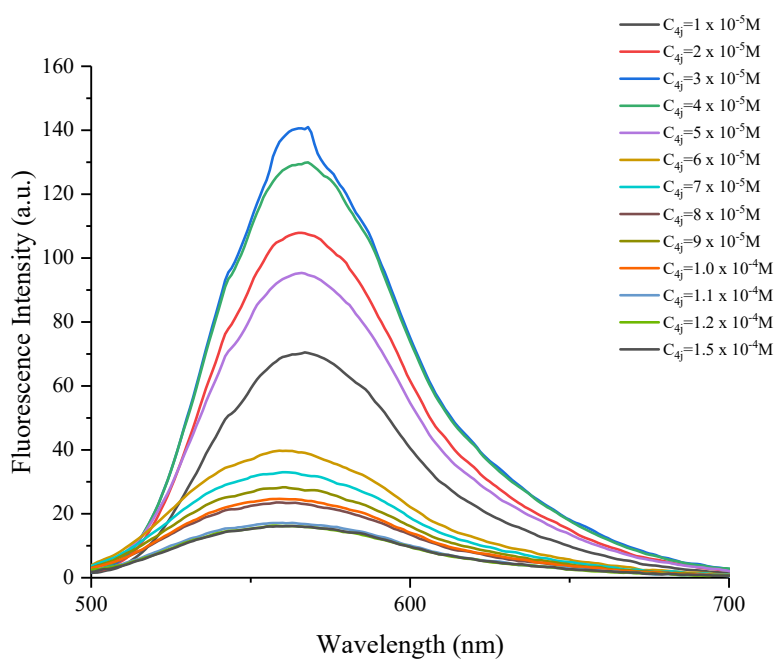

**Figure S18** The fluorescence emission spectrum of gradient concentration of **4j** and K<sub>2</sub>CO<sub>3</sub> (DMF:H<sub>2</sub>O=5:1, n(**4j**) : n (K<sub>2</sub>CO<sub>3</sub>) = 1:7)

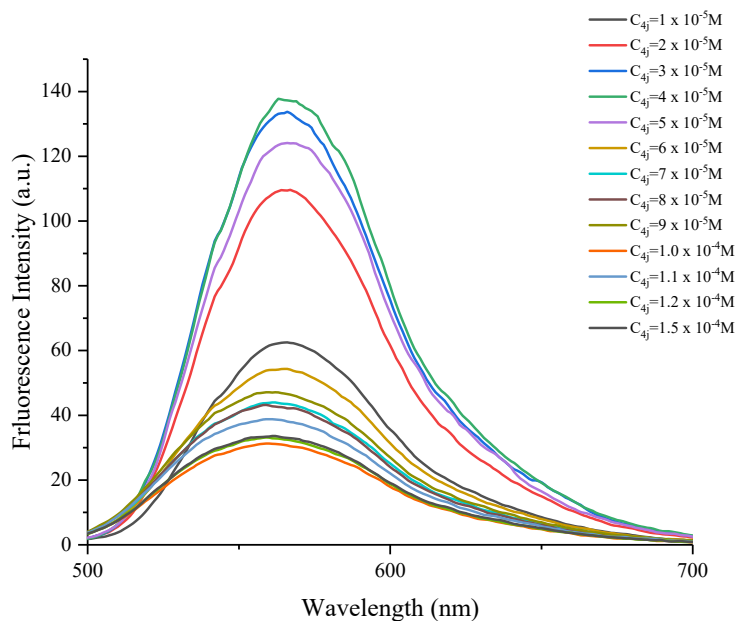

**Figure S19** The fluorescence emission spectrum of gradient concentration of **4j** and  $\text{Cs}_2\text{CO}_3$  (DMF:H<sub>2</sub>O=5:1, n(**4j**) : n ( $\text{Cs}_2\text{CO}_3$ ) = 1:7)

### 3.5 Physical datas of products

#### 5-methyl-7,17-diphenyl-5b,8a-dihydro-5H,6H-5a,8b-[3,4]epipyrrolonaphtho[2,3-c]pyrrolo[3,4-a]carbazole-6,8,9,14,16,18(7H)-hexaone (**4a**)

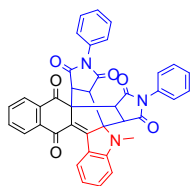

Yield: 78 %, 74 mg; red solid; m.p. 282-283 °C; R<sub>f</sub> = 0.26 (PE:EA=1:1).

**<sup>1</sup>H NMR (400 MHz, DMSO-*d*<sub>6</sub>):**  $\delta$  9.14 (d,  $J$  = 8.0 Hz, 1H), 8.21 – 8.15 (m, 2H), 7.88 – 7.81 (m, 2H), 7.47 (ddd,  $J$  = 8.3, 7.2, 1.2 Hz, 1H), 7.33 – 7.22 (m, 6H), 6.89 (d,  $J$  = 8.4 Hz, 1H), 6.75 (t,  $J$  = 7.6 Hz, 1H), 6.65 – 6.57 (m, 4H), 4.28 (d,  $J$  = 8.5 Hz, 2H), 4.05 (d,  $J$  = 8.5 Hz, 2H), 3.42 (s, 3H).

**<sup>13</sup>C NMR (101 MHz, DMSO-*d*<sub>6</sub>):**  $\delta$  194.1, 178.5, 174.7, 172.0, 159.0, 153.5, 137.3,

136.0, 135.4, 135.2, 134.1, 131.7, 129.7, 129.5, 129.1, 127.8, 126.7, 126.6, 119.5, 117.2, 116.4, 107.8, 72.7, 51.9, 46.0, 41.8, 28.6.

**HRMS (ESI): m/z:**  $[M+Na]^+$  Calcd. for  $C_{39}H_{25}N_3NaO_6^+$ : 654.1635; Found: 654.1633.

**7,17-diphenyl-5b,8a-dihydro-5H,6H-5a,8b-[3,4]epipyrrolonaphtho[2,3-c]pyrrolo[3,4-a]carbazole-6,8,9,14,16,18(7H)-hexaone (4b)**

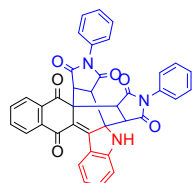

Yield: 54 %, 50 mg; orange soild; m.p. 208-210 °C; Rf=0.15 (PE:EA=1:1).

**$^1H$  NMR (400 MHz,  $CDCl_3$ ):**  $\delta$  9.22 (d,  $J = 8.2$  Hz, 1H), 8.37 – 8.32 (m, 1H), 8.29 – 8.24 (m, 1H), 7.77 – 7.71 (m, 2H), 7.46 (t,  $J = 7.7$  Hz, 1H), 7.23 (dd,  $J = 6.8, 4.4$  Hz, 6H), 7.01 (d,  $J = 8.2$  Hz, 1H), 6.95 (t,  $J = 7.7$  Hz, 1H), 6.70 (dd,  $J = 6.7, 2.9$  Hz, 4H), 5.93 (s, 1H), 4.14 (d,  $J = 8.7$  Hz, 2H), 3.58 (d,  $J = 8.7$  Hz, 2H).

**$^{13}C$  NMR (101 MHz,  $CDCl_3$ ):**  $\delta$  193.9, 179.0, 173.3, 171.1, 158.6, 153.3, 136.9, 135.8, 135.0, 134.9, 133.8, 130.6, 130.1, 129.2, 129.1, 128.3, 126.7, 126.1, 120.7, 120.2, 118.1, 111.6, 69.7, 51.8, 45.8, 45.2.

**HRMS (ESI): m/z:**  $[M+Na]^+$  Calcd. for  $C_{38}H_{23}N_3NaO_6^+$ : 640.1479; Found: 640.1509.

**5-benzyl-7,17-diphenyl-5b,8a-dihydro-5H,6H-5a,8b-[3,4]epipyrrolonaphtho[2,3-c]pyrrolo[3,4-a]carbazole-6,8,9,14,16,18(7H)-hexaone (4c)**

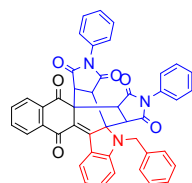

Yield: 70 %, 74 mg; red soild; m.p. 284-287 °C; Rf = 0.36 (PE:EA=1:1).

**$^1H$  NMR (400 MHz,  $DMSO-d_6$ ):**  $\delta$  9.19 – 9.16 (d, 1H), 8.21 – 8.15 (m, 2H), 7.87 – 7.80 (m, 4H), 7.39 – 7.25 (m, 10H), 6.82 – 6.78 (m, 1H), 6.66 – 6.58 (m, 4H), 6.50 (d,  $J = 8.4$  Hz, 1H), 5.21 (s, 2H), 4.39 (d,  $J = 8.5$  Hz, 2H), 4.06 (d,  $J = 8.5$  Hz, 2H).

**$^{13}C$  NMR (101 MHz,  $DMSO-d_6$ ):**  $\delta$  193.8, 178.8, 174.5, 172.4, 160.0, 154.3, 137.4,

136.8, 135.8, 135.3, 135.2, 134.2, 131.8, 129.6, 129.5, 129.2, 129.0, 128.7, 127.8, 127.7, 126.8, 126.7, 120.8, 118.2, 116.7, 110.0, 74.1, 52.0, 49.3, 46.2, 42.2.

**HRMS (ESI): m/z:**  $[M+H]^+$  Calcd. for  $C_{45}H_{30}N_3O_6^+$ : 708.2135; Found: 708.2132.

**5-butyl-7,17-diphenyl-5b,8a-dihydro-5H,6H-5a,8b-[3,4]epipyrrolonaphtho[2,3-c]pyrrolo[3,4-a]carbazole-6,8,9,14,16,18(7H)-hexaone (4d)**

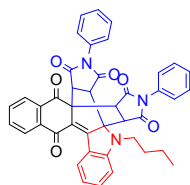

Yield: 71 %, 72 mg; red soild; m.p. 260-263 °C; Rf = 0.66 (PE:EA=1:1).

**$^1H$  NMR (400 MHz, DMSO- $d_6$ ):**  $\delta$  9.15 (d,  $J$  = 7.4 Hz, 1H), 8.24 – 8.11 (m, 2H), 7.88 – 7.79 (m, 2H), 7.47 (ddd,  $J$  = 8.4, 7.1, 1.3 Hz, 1H), 7.32 – 7.24(m, 5H), 6.87 (d,  $J$  = 8.4 Hz, 1H), 6.76 (t,  $J$  = 7.4 Hz, 1H), 6.62 – 6.59 (m, 3H), 4.33 (d,  $J$  = 8.5 Hz, 2H), 4.01 (d,  $J$  = 8.5 Hz, 2H), 3.86 – 3.75 (m, 2H), 1.98 (dt,  $J$  = 15.9, 8.0 Hz, 2H), 1.50 (dq,  $J$  = 14.8, 7.4 Hz, 2H), 0.99 (t,  $J$  = 7.4 Hz, 3H).

**$^{13}C$  NMR (101 MHz, DMSO- $d_6$ ):**  $\delta$  194.1, 178.5, 174.5, 172.0, 159.4, 154.1, 137.2, 136.0, 135.3, 135.1, 134.0, 131.8, 129.8, 129.5, 129.1, 127.8, 126.7, 126.6, 119.8, 117.3, 116.0, 108.4, 73.2, 51.9, 46.0, 44.3, 42.1, 30.5, 20.8, 14.5.

**HRMS (ESI): m/z:**  $[M+H]^+$  Calcd. for  $C_{42}H_{32}N_3O_6^+$ : 674.2291; Found: 674.2291.

**5-allyl-7,17-diphenyl-5b,8a-dihydro-5H,6H-5a,8b-[3,4]epipyrrolonaphtho[2,3-c]pyrrolo[3,4-a]carbazole-6,8,9,14,16,18(7H)-hexaone (4f)**

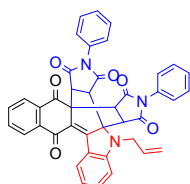

Yield: 76 %, 75 mg; red soild; m.p. 246-248 °C;Rf = 0.4 (PE:EA=1:1).

**$^1H$  NMR (400 MHz, DMSO- $d_6$ ):**  $\delta$  9.15 (d,  $J$  = 7.5 Hz, 1H), 8.21 – 8.15 (m, 2H), 7.87 – 7.82 (m, 2H), 7.45 (ddd,  $J$  = 8.5, 7.2, 1.3 Hz, 1H), 7.33 – 7.23 (m, 6H), 6.90 (d,  $J$  = 8.4 Hz, 1H), 6.81 – 6.76 (m, 1H), 6.66 – 6.58 (m, 4H), 6.48-6.40 (m, 1H), 5.61 (dd,  $J$



= 17.4, 1.4 Hz, 1H), 5.31 (dd,  $J = 10.3, 1.4$  Hz, 1H), 4.57 (d,  $J = 6.4$  Hz, 2H), 4.31 (d,  $J = 8.5$  Hz, 2H), 4.04 (d,  $J = 8.5$  Hz, 2H).

**$^{13}\text{C}$  NMR (101 MHz, DMSO- $d_6$ ):**  $\delta$  194.0, 178.7, 174.6, 172.1, 159.2, 153.6, 137.0, 136.1, 135.9, 135.3, 135.2, 134.2, 131.7, 129.7, 129.5, 129.1, 127.8, 126.7, 126.6, 120.0, 118.2, 117.6, 116.5, 108.9, 73.2, 51.9, 47.2, 45.9, 42.1.

**HRMS (ESI):  $m/z$ :**  $[\text{M}+\text{H}]^+$  Calcd. for  $\text{C}_{41}\text{H}_{28}\text{N}_3\text{O}_6^+$ : 658.1978; Found: 658.1981.

**2-methoxy-5-methyl-7,17-diphenyl-5b,8a-dihydro-5H,6H-5a,8b-[3,4]epipyrrolo-naphtho[2,3-c]pyrrolo[3,4-a]carbazole-6,8,9,14,16,18(7H)-hexaone (4g)**

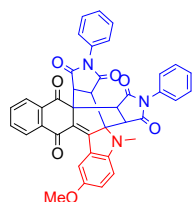

Yield: 92 %, 91 mg; purple soild; m.p. 271-271 °C;  $R_f = 0.29$  (PE:EA=1:1).

**$^1\text{H}$  NMR (400 MHz, DMSO- $d_6$ ):**  $\delta$  8.76 (d,  $J = 2.7$  Hz, 1H), 8.21 – 8.15 (m, 2H), 7.83 (m, 2H), 7.33 – 7.20 (m, 7H), 6.88 (d,  $J = 9.1$  Hz, 1H), 6.68 – 6.60 (m, 4H), 4.26 (d,  $J = 8.6$  Hz, 2H), 4.02 (d,  $J = 8.6$  Hz, 2H), 3.77 (s, 3H), 3.40 (s, 3H).

**$^{13}\text{C}$  NMR (101 MHz, DMSO- $d_6$ ):**  $\delta$  194.2, 178.2, 174.7, 172.0, 155.2, 153.7, 150.9, 136.1, 135.3, 135.1, 133.9, 131.7, 129.5, 129.1, 127.9, 127.4, 126.7, 126.6, 119.6, 115.7, 111.4, 108.6, 73.1, 56.2, 51.9, 45.8, 41.8, 28.7.

**HRMS (ESI):  $m/z$ :**  $[\text{M}+\text{H}]^+$  Calcd. for  $\text{C}_{40}\text{H}_{28}\text{N}_3\text{O}_7^+$ : 662.1927; Found: 662.1926.

**2-chloro-5-methyl-7,17-diphenyl-5b,8a-dihydro-5H,6H-5a,8b-[3,4]epipyrrolo-naphtho[2,3-c]pyrrolo[3,4-a]carbazole-6,8,9,14,16,18(7H)-hexaone (4h)**

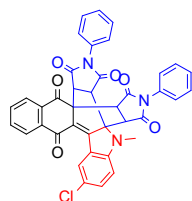

Yield: 87 %, 87 mg; red soild; m.p. 298-302 °C;  $R_f = 0.23$  (PE:EA= 1:1).

**$^1\text{H}$  NMR (400 MHz, DMSO- $d_6$ ):**  $\delta$  9.22 (d,  $J = 1.8$  Hz, 1H), 8.31 – 8.25 (m, 2H), 7.98 – 7.92 (m, 2H), 7.57 (dd,  $J = 8.9, 1.7$  Hz, 1H), 7.37 (dq,  $J = 14.4, 7.2$  Hz, 6H), 7.04 (d,

$J = 8.9$  Hz, 1H), 6.70 (d,  $J = 7.4$  Hz, 4H), 4.38 (d,  $J = 8.5$  Hz, 2H), 3.50 (s, 3H).

**$^{13}\text{C}$  NMR (101 MHz, DMSO- $d_6$ ):**  $\delta$  193.7, 178.9, 174.6, 171.9, 157.5, 152.0, 136.8, 135.6, 135.4, 135.3, 134.5, 131.6, 129.6, 129.2, 128.1, 127.9, 126.7, 126.6, 120.4, 120.1, 117.8, 109.4, 73.2, 52.0, 45.7, 41.7, 28.8.

**HRMS (ESI): m/z:**  $[\text{M}+\text{Na}]^+$  Calcd. for  $\text{C}_{39}\text{H}_{24}\text{ClN}_3\text{NaO}_6^+$ : 688.1246; Found: 688.1284.

**2-bromo-5-methyl-7,17-diphenyl-5b,8a-dihydro-5H,6H-5a,8b-[3,4]epipyrrolo-naphtho[2,3-c]pyrrolo[3,4-a]carbazole-6,8,9,14,16,18(7H)-hexaone (4i)**

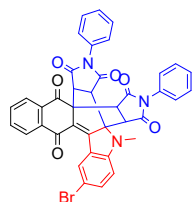

Yield: 83 %, 88 mg; red soild; m.p. 288-291 °C;  $R_f = 0.2$  (PE:EA= 1:1).

**$^1\text{H}$  NMR (400 MHz, DMSO- $d_6$ ):**  $\delta$  9.30 (d,  $J = 2.1$  Hz, 1H), 8.25 – 8.17 (m, 2H), 7.90 – 7.85 (m, 2H), 7.59 (dd,  $J = 8.9, 2.2$  Hz, 1H), 7.36 – 7.25 (m, 6H), 6.92 (d,  $J = 8.9$  Hz, 1H), 6.68 – 6.60 (m, 4H), 4.31 (d,  $J = 8.6$  Hz, 2H), 4.06 (d,  $J = 8.5$  Hz, 2H), 3.42 (s, 3H).

**$^{13}\text{C}$  NMR (101 MHz, DMSO- $d_6$ ):**  $\delta$  193.7, 179.0, 174.6, 171.9, 157.8, 151.9, 139.3, 135.6, 135.4, 135.3, 134.5, 131.6, 131.1, 129.6, 129.2, 128.0, 126.7, 126.6, 120.9, 117.8, 109.9, 107.9, 73.1, 52.0, 45.8, 41.8, 28.8.

**HRMS (ESI): m/z:**  $[\text{M}+\text{H}]^+$  Calcd. for  $\text{C}_{39}\text{H}_{25}\text{BrN}_3\text{O}_6^+$ : 710.0927; Found: 710.0923.

**5-methyl-2-nitro-7,17-diphenyl-5b,8a-dihydro-5H,6H-5a,8b-[3,4]epipyrrolo-naphtho[2,3-c]pyrrolo[3,4-a]carbazole-6,8,9,14,16,18(7H)-hexaone (4j)**

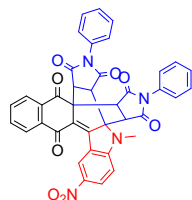

Yield: 46 %, 47 mg; orange soild; m.p. 297-300 °C;  $R_f = 0.14$  (PE:EA=1:1).

**$^1\text{H}$  NMR (400 MHz, DMSO- $d_6$ ):**  $\delta$  10.07 (d,  $J = 2.4$  Hz, 1H), 8.35 (dd,  $J = 9.3, 2.5$  Hz,

1H), 8.29 – 8.21 (m, 2H), 7.94 – 7.88 (m, 2H), 7.33 – 7.24 (m, 6H), 7.12 (d,  $J = 9.4$  Hz, 1H), 6.68 – 6.61 (m, 4H), 4.42 (d,  $J = 8.5$  Hz, 2H), 4.13 (d,  $J = 8.5$  Hz, 2H), 3.55 (s, 3H).

$^{13}\text{C}$  NMR (101 MHz, DMSO- $d_6$ ):  $\delta$  193.1, 179.5, 174.5, 171.9, 161.3, 150.7, 137.8, 135.5, 135.5, 135.2, 135.0, 132.3, 131.4, 129.6, 129.2, 128.2, 126.9, 126.6, 126.2, 120.4, 118.6, 107.9, 74.2, 52.1, 46.0, 41.8, 29.5.

HRMS (ESI):  $m/z$ :  $[\text{M}+\text{H}]^+$  Calcd. for  $\text{C}_{39}\text{H}_{25}\text{N}_4\text{O}_8^+$ : 677.1672; Found: 677.1667.

**5-methyl-6,8,9,14,16,18-hexaoxo-7,17-diphenyl-5b,7,8,8a,9,14-hexahydro-5H,6H-5a,8b-[3,4]epipyrrolonaphtho[2,3-c]pyrrolo[3,4-a]carbazole-2-carbonitrile (4k)**

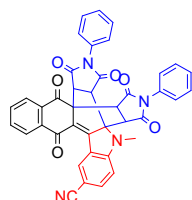

Yield: 53 %, 52 mg; orange soild; m.p. 278-281 °C;  $R_f = 0.16$  (PE:EA=1:1).

$^1\text{H}$  NMR (400 MHz, DMSO- $d_6$ ):  $\delta$  9.47 (d,  $J = 1.5$  Hz, 1H), 8.26 – 8.19 (m, 2H), 7.90 (dd,  $J = 5.8, 3.3$  Hz, 2H), 7.83 (dd,  $J = 8.8, 1.7$  Hz, 1H), 7.34 – 7.25 (m, 6H), 7.10 (d,  $J = 8.8$  Hz, 1H), 6.66 – 6.60 (m, 4H), 4.37 (d,  $J = 8.5$  Hz, 2H), 4.10 (d,  $J = 8.5$  Hz, 2H), 3.49 (s, 3H).

$^{13}\text{C}$  NMR (101 MHz, DMSO- $d_6$ ):  $\delta$  193.3, 179.4, 174.5, 171.9, 160.0, 150.8, 139.4, 135.5, 135.3, 134.8, 134.0, 131.5, 129.6, 129.3, 128.1, 126.9, 126.6, 120.1, 119.6, 119.2, 109.1, 98.5, 73.4, 52.0, 45.9, 41.7, 29.1.

HRMS (ESI):  $m/z$ :  $[\text{M}+\text{H}]^+$  Calcd. for  $\text{C}_{40}\text{H}_{25}\text{N}_4\text{O}_6^+$ : 657.1774; Found: 657.1774.

**2,3-dichloro-5-methyl-7,17-diphenyl-5b,8a-dihydro-5H,6H-5a,8b-[3,4]epipyrrolo-naphtho[2,3-c]pyrrolo[3,4-a]carbazole-6,8,9,14,16,18(7H)-hexaone (4l)**

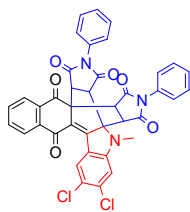

Yield: 74 %, 78 mg; red soild; m.p. 306-308 °C; Rf = 0.2 (PE:EA=1:1).

**<sup>1</sup>H NMR (400 MHz, DMSO-*d*<sub>6</sub>):** δ 9.31 (s, 1H), 8.24 – 8.19 (m, 2H), 7.91 – 7.86 (m, 2H), 7.36 – 7.26 (m, 7H), 6.67 – 6.63 (m, 4H), 4.32 (d, *J* = 8.5 Hz, 2H), 4.07 (d, *J* = 8.5 Hz, 2H), 3.43 (s, 3H).

**<sup>13</sup>C NMR (101 MHz, DMSO-*d*<sub>6</sub>):** δ 193.4, 179.2, 174.5, 172.0, 157.5, 150.9, 139.7, 135.4, 135.4, 134.7, 131.5, 129.7, 129.6, 129.2, 128.0, 126.8, 126.6, 119.1, 118.7, 118.5, 109.3, 73.5, 52.0, 45.8, 41.8, 29.0.

**HRMS (ESI): m/z:** [M+Na]<sup>+</sup> Calcd. for C<sub>39</sub>H<sub>23</sub>Cl<sub>2</sub>N<sub>3</sub>NaO<sub>6</sub><sup>+</sup>: 722.0856; Found: 722.0883.

**3-methoxy-5-methyl-7,17-diphenyl-5b,8a-dihydro-5H,6H-5a,8b-[3,4]epipyrrolo-naphtho[2,3-c]pyrrolo[3,4-a]carbazole-6,8,9,14,16,18(7H)-hexaone (4m)**

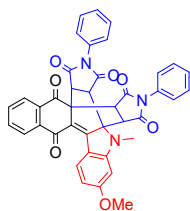

Yield: 76 %, 75 mg; orange soild; m.p. 289-293 °C; Rf = 0.14 (PE:EA=1:1).

**<sup>1</sup>H NMR (400 MHz, DMSO-*d*<sub>6</sub>):** δ 9.12 (d, *J* = 9.0 Hz, 1H), 8.19 – 8.13 (m, 2H), 7.85 – 7.77 (m, 2H), 7.34 – 7.24 (m, 6H), 6.64 (d, *J* = 7.2 Hz, 4H), 6.40 – 6.33 (m, 2H), 4.24 (d, *J* = 8.6 Hz, 2H), 4.01 (d, *J* = 8.6 Hz, 2H), 3.84 (s, 3H), 3.43 (s, 3H).

**<sup>13</sup>C NMR (101 MHz, DMSO-*d*<sub>6</sub>):** δ 194.6, 177.7, 174.7, 172.2, 167.7, 161.7, 152.6, 136.4, 135.2, 135.0, 133.5, 131.8, 131.4, 129.5, 129.1, 127.6, 126.7, 126.5, 113.7, 112.5, 107.5, 90.4, 73.6, 56.2, 51.5, 46.5, 41.9, 28.7.

**HRMS (ESI): m/z:** [M+H]<sup>+</sup> Calcd. for C<sub>40</sub>H<sub>28</sub>N<sub>3</sub>O<sub>7</sub><sup>+</sup>: 662.1927; Found: 662.1926.

**3-chloro-5-methyl-7,17-diphenyl-5b,8a-dihydro-5H,6H-5a,8b-[3,4]epipyrrolo-naphtho[2,3-c]pyrrolo[3,4-a]carbazole-6,8,9,14,16,18(7H)-hexaone (4n)**

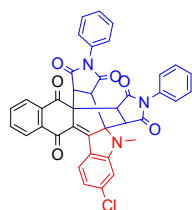

Yield: 66 %, 66 mg; orange soild; m.p. 313-316 °C; Rf = 0.34 (PE:EA=1:1).

**<sup>1</sup>H NMR (400 MHz, DMSO-*d*<sub>6</sub>):** δ 9.13 (d, *J* = 8.7 Hz, 1H), 8.21 – 8.16 (m, 2H), 7.88 – 7.84 (m, 2H), 7.34 – 7.25 (m, 6H), 7.05 (d, *J* = 1.9 Hz, 1H), 6.78 (dd, *J* = 8.7, 1.9 Hz, 1H), 6.64 – 6.59 (m, 4H), 4.30 (d, *J* = 8.5 Hz, 2H), 4.06 (d, *J* = 8.5 Hz, 2H), 3.42 (s, 3H).

**<sup>13</sup>C NMR (101 MHz, DMSO-*d*<sub>6</sub>):** δ 193.8, 178.8, 174.6, 172.0, 159.4, 152.0, 142.3, 135.7, 135.4, 135.3, 134.3, 131.6, 131.0, 129.6, 129.2, 127.8, 126.7, 126.6, 118.3, 117.5, 117.3, 110.0, 107.5, 73.3, 51.9, 46.0, 41.8, 28.8.

**HRMS (ESI):** *m/z*: [M+H]<sup>+</sup> Calcd. for C<sub>39</sub>H<sub>25</sub>ClN<sub>3</sub>O<sub>6</sub><sup>+</sup>: 666.1432; Found: 666.1428.

**3-fluoro-5-methyl-7,17-diphenyl-5b,8a-dihydro-5H,6H-5a,8b-[3,4]epipyrrolo-naphtho[2,3-c]pyrrolo[3,4-a]carbazole-6,8,9,14,16,18(7H)-hexaone (4o)**

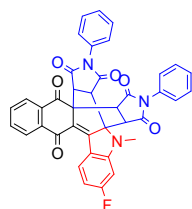

Yield: 69 %, 67 mg; orange soild; m.p. 285-287 °C; Rf = 0.28 (PE:EA=1:1).

**<sup>1</sup>H NMR (400 MHz, DMSO-*d*<sub>6</sub>):** δ 9.22 (dd, *J* = 9.0, 6.2 Hz, 1H), 8.20 – 8.15 (m, 2H), 7.88 – 7.83 (m, 2H), 7.33 – 7.24 (m, 6H), 6.81 (dd, *J* = 10.6, 2.3 Hz, 1H), 6.64 – 6.60 (m, 4H), 6.57 (dd, *J* = 9.1, 2.3 Hz, 1H), 4.28 (d, *J* = 8.6 Hz, 2H), 4.05 (d, *J* = 8.5 Hz, 2H), 3.41 (s, 3H).

**<sup>13</sup>C NMR (101 MHz, DMSO-*d*<sub>6</sub>):** δ 193.9, 178.6, 174.6, 172.0, δ 168.9 (d, *J* = 253.3

Hz), 160.9 (d,  $J = 14.7$  Hz), 152.2, 135.8, 135.4, 135.2, 134.2, 132.3 (d,  $J = 12.1$  Hz), 131.7, 129.5, 129.2, 127.8, 126.6, 116.4, 116.1 (d,  $J = 2.3$  Hz), 110.0, 105.4 (d,  $J = 23.9$  Hz), 94.4 (d,  $J = 26.3$  Hz), 73.7, 51.8, 46.1, 41.8, 28.9;  $^{19}\text{F}$  NMR (376 MHz, dmsO)  $\delta$  -100.17.

**HRMS (ESI): m/z:**  $[\text{M}+\text{H}]^+$  Calcd. for  $\text{C}_{39}\text{H}_{25}\text{FN}_3\text{O}_6^+$ : 650.1727; Found: 650.1730.

**4,5-dimethyl-7,17-diphenyl-5b,8a-dihydro-5H,6H-5a,8b-[3,4]epipyrrolo-naphtho[2,3-c]pyrrolo[3,4-a]carbazole-6,8,9,14,16,18(7H)-hexaone (4p)**

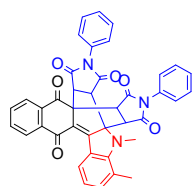

Yield: 90 %, 74 mg; red soild; m.p. 276-278 °C;  $R_f = 0.4$  (PE:EA=1:1).

**$^1\text{H}$  NMR (400 MHz,  $\text{CDCl}_3$ ):**  $\delta$  9.22 (d,  $J = 8.2$  Hz, 1H), 8.29 (t,  $J = 8.6$  Hz, 2H), 7.75 – 7.67 (m, 2H), 7.25 – 7.21 (m, 6H), 7.17 (d,  $J = 7.1$  Hz, 1H), 6.75 – 6.67 (m, 5H), 4.07 (d,  $J = 8.8$  Hz, 2H), 3.74 (s, 3H), 3.63 (d,  $J = 8.8$  Hz, 2H), 2.62 (s, 3H).

**$^{13}\text{C}$  NMR (101 MHz,  $\text{CDCl}_3$ ):**  $\delta$  194.2, 178.4, 173.4, 170.6, 157.5, 152.8, 140.5, 136.4, 134.9, 134.8, 133.4, 130.7, 129.3, 129.0, 128.3, 126.4, 126.2, 120.4, 118.8, 118.1, 115.3, 72.5, 51.8, 45.3, 42.0, 31.8, 20.4.

**HRMS (ESI): m/z:**  $[\text{M}+\text{H}]^+$  Calcd. for  $\text{C}_{40}\text{H}_{28}\text{N}_3\text{O}_6^+$ : 646.1973; Found: 646.2003.

**5-methyl-7,19-diphenyl-5b,8a-dihydro-5H,6H-5a,8b-[3,4]epipyrroloanthra[2,3-c]pyrrolo[3,4-a]carbazole-6,8,9,16,18,20(7H)-hexaone (4s)**

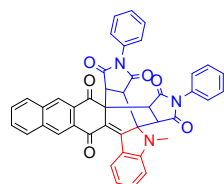

Yield: 70 %, 71 mg; red soild; m.p. 289-292 °C;  $R_f = 0.23$  (PE:EA=1:1).

**$^1\text{H}$  NMR (400 MHz,  $\text{DMSO-d}_6$ ):**  $\delta$  9.21 (d,  $J = 8.0$  Hz, 1H), 8.82 (d,  $J = 9.2$  Hz, 2H), 8.30 (dd,  $J = 6.1, 3.4$  Hz, 1H), 8.21 (dd,  $J = 6.1, 3.4$  Hz, 1H), 7.74 (dq,  $J = 6.8, 3.5$  Hz, 2H), 7.50 – 7.45 (m, 1H), 7.29 – 7.19 (m, 6H), 6.89 (d,  $J = 8.4$  Hz, 1H), 6.76 (t,  $J = 7.6$

Hz, 1H), 6.63 – 6.58 (m, 4H), 4.29 (d,  $J = 8.5$  Hz, 2H), 4.10 (d,  $J = 8.5$  Hz, 2H), 3.43 (s, 3H).

**$^{13}\text{C}$  NMR (101 MHz, DMSO- $d_6$ ):**  $\delta$  194.1, 178.4, 174.8, 172.0, 159.0, 153.8, 137.2, 135.3, 134.7, 132.0, 131.7, 131.6, 130.4, 130.1, 130.1, 129.9, 129.9, 129.8, 129.4, 129.1, 128.5, 126.6, 119.7, 117.2, 116.8, 107.8, 72.8, 52.3, 45.9, 41.8, 28.6.

**HRMS (ESI):  $m/z$ :**  $[\text{M}+\text{H}]^+$  Calcd. for  $\text{C}_{43}\text{H}_{28}\text{N}_3\text{O}_6^+$ : 682.1973; Found: 682.2005.

**10,13-dihydroxy-5-methyl-7,17-diphenyl-5b,8a-dihydro-5H,6H-5a,8b-[3,4]epipyrrolonaphtho[2,3-c]pyrrolo[3,4-a]carbazole-6,8,9,14,16,18(7H)-hexaone (4r)**

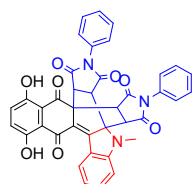

Yield: 77 %, 77 mg; purple solid; m.p. 211-213 °C;  $R_f = 0.22$  (PE:EA=1:2).

**$^1\text{H}$  NMR (400 MHz, DMSO- $d_6$ ):**  $\delta$  13.48 (s, 1H), 12.36 (s, 1H), 9.06 (d,  $J = 8.2$  Hz, 1H), 7.55 (t,  $J = 7.7$  Hz, 1H), 7.37 – 7.27 (m, 8H), 6.99 (d,  $J = 8.5$  Hz, 1H), 6.81 (t,  $J = 7.6$  Hz, 1H), 6.70 – 6.62 (m, 4H), 4.37 (d,  $J = 8.6$  Hz, 2H), 4.09 (d,  $J = 8.6$  Hz, 2H), 3.47 (s, 3H).

**$^{13}\text{C}$  NMR (101 MHz, DMSO- $d_6$ ):**  $\delta$  200.2, 183.0, 174.3, 171.8, 159.8, 156.9, 155.4, 155.2, 138.3, 131.6, 130.4, 129.6, 129.4, 129.2, 127.6, 126.6, 119.3, 117.9, 116.2, 115.2, 114.3, 108.4, 73.2, 51.7, 45.8, 41.5, 28.7.

**HRMS (ESI):  $m/z$ :**  $[\text{M}+\text{H}]^+$  Calcd. for  $\text{C}_{39}\text{H}_{26}\text{N}_3\text{O}_8^+$ : 664.1714; Found: 664.1744.

**11,12-dibromo-5-methyl-7,17-diphenyl-5b,8a-dihydro-5H,6H-5a,8b-[3,4]epipyrrolonaphtho[2,3-c]pyrrolo[3,4-a]carbazole-6,8,9,14,16,18(7H)-hexaone (4u)**

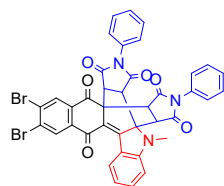

Yield: 58 %, 69 mg; red soild; m.p. 316-320 °C; Rf = 0.34 (PE:EA=1:1).

**<sup>1</sup>H NMR (400 MHz, CDCl<sub>3</sub>):** δ 9.24 (d, *J* = 8.2 Hz, 1H), 8.52 (s, 1H), 8.51 (s, 1H), 7.52 (t, *J* = 7.6 Hz, 1H), 7.25 (d, *J* = 1.9 Hz, 4H), 6.88 – 6.79 (m, 2H), 6.74 – 6.67 (m, 4H), 4.08 (d, *J* = 8.8 Hz, 2H), 3.67 (d, *J* = 8.8 Hz, 2H), 3.47 (s, 3H).

**<sup>13</sup>C NMR (101 MHz, CDCl<sub>3</sub>):** δ 192.6, 176.5, 173.4, 170.3, 159.1, 153.2, 138.0, 135.4, 134.1, 133.7, 133.1, 131.6, 131.6, 130.5, 130.3, 129.3, 129.1, 126.0, 119.3, 118.3, 115.2, 107.5, 72.3, 51.9, 45.4, 42.1, 28.3.

**HRMS (ESI): m/z:** [M+H]<sup>+</sup> Calcd. for C<sub>39</sub>H<sub>24</sub>Br<sub>2</sub>N<sub>3</sub>O<sub>6</sub><sup>+</sup>: 788.0032; Found: 788.0029.

**5-methyl-5b,8a-dihydro-5H,6H-5a,8b-[3,4]epipyrrolonaphtho[2,3-c]pyrrolo[3,4-a]carbazole-6,8,9,14,16,18(7H)-hexaone (5a)**

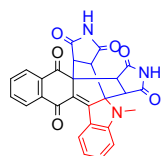

Yield: 60 %, 43 mg; red soild; m.p. 278-281 °C; Rf = 0.15(PE:EA=1:1).

**<sup>1</sup>H NMR (400 MHz, DMSO-d<sub>6</sub>):** δ 11.10 (s, 2H), 9.07 (d, *J* = 8.1 Hz, 1H), 8.23 – 8.12 (m, 2H), 7.88 (dd, *J* = 9.1, 5.6 Hz, 2H), 7.46 (t, *J* = 7.6 Hz, 1H), 6.88 (d, *J* = 8.4 Hz, 1H), 6.69 (t, *J* = 7.6 Hz, 1H), 3.89 (d, *J* = 8.6 Hz, 2H), 3.75 (d, *J* = 8.6 Hz, 2H), 3.33 (s, 3H).

**<sup>13</sup>C NMR (101 MHz, DMSO-d<sub>6</sub>):** δ 194.3, 178.6, 176.9, 174.3, 158.9, 153.6, 136.8, 136.2, 135.4, 134.9, 134.0, 130.1, 127.7, 126.6, 119.5, 116.6, 107.7, 72.2, 51.2, 47.1, 42.9, 28.5.

**HRMS (ESI): m/z:** [M+H]<sup>+</sup> Calcd. for C<sub>27</sub>H<sub>18</sub>N<sub>3</sub>O<sub>6</sub><sup>+</sup>: 480.1190; Found: 480.1212.

**5,7,17-trimethyl-5b,8a-dihydro-5H,6H-5a,8b-[3,4]epipyrrolonaphtho[2,3-c]pyrrolo[3,4-a]carbazole-6,8,9,14,16,18(7H)-hexaone (5b)**

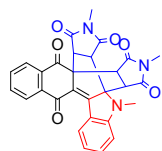

Yield: 75 %, 57 mg; red soild; m.p. 273-275 °C; Rf = 0.17 (PE:EA=1:1).



**<sup>1</sup>H NMR (400 MHz, DMSO-*d*<sub>6</sub>):** δ 8.98 (d, *J* = 8.1 Hz, 1H), 8.22 – 8.14 (m, 2H), 7.91 – 7.85 (m, 2H), 7.48 – 7.43 (m, 1H), 6.88 (d, *J* = 8.4 Hz, 1H), 6.67 (t, *J* = 7.6 Hz, 1H), 4.02 (d, *J* = 8.6 Hz, 2H), 3.80 (d, *J* = 8.6 Hz, 2H), 3.38 (s, 3H), 2.38 (s, 6H).

**<sup>13</sup>C NMR (101 MHz, DMSO-*d*<sub>6</sub>):** δ 194.1, 178.3, 175.4, 172.9, 158.8, 153.3, 137.0, 136.1, 135.2, 135.1, 134.0, 130.0, 127.8, 126.7, 119.3, 116.8, 116.2, 107.6, 72.2, 51.3, 45.8, 41.7, 28.5, 24.8.

**HRMS (ESI): *m/z*:** [M+Na]<sup>+</sup> Calcd. for C<sub>29</sub>H<sub>21</sub>N<sub>3</sub>NaO<sub>6</sub><sup>+</sup>: 530.1323; Found: 530.1350.

**5-methyl-7,17-dipropyl-5b,8a-dihydro-5H,6H-5a,8b-[3,4]epipyrrolonaphtho[2,3-c]pyrrolo[3,4-a]carbazole-6,8,9,14,16,18(7H)-hexaone (5c)**

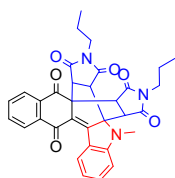

Yield: 67 %, 57 mg; red soild; m.p. 291-293 °C; R<sub>f</sub> = 0.43 (PE:EA=1:1).

**<sup>1</sup>H NMR (400 MHz, DMSO-*d*<sub>6</sub>):** δ 9.00 (d, *J* = 7.9 Hz, 1H), 8.23 – 8.15 (m, 2H), 7.91 – 7.86 (m, 2H), 7.48 – 7.43 (m, 1H), 6.88 (d, *J* = 8.4 Hz, 1H), 6.67 (t, *J* = 7.3 Hz, 1H), 4.00 (d, *J* = 8.5 Hz, 2H), 3.81 (d, *J* = 8.5 Hz, 2H), 3.39 (s, 3H), 2.91 (t, *J* = 6.9 Hz, 4H), 0.89 – 0.81 (m, 4H), 0.32 (t, *J* = 7.5 Hz, 6H).

**<sup>13</sup>C NMR (101 MHz, DMSO-*d*<sub>6</sub>):** δ 194.2, 178.2, 175.4, 172.8, 158.8, 153.3, 136.9, 136.2, 135.3, 135.1, 133.9, 130.0, 127.6, 126.6, 119.7, 116.7, 116.3, 107.5, 72.3, 51.5, 45.6, 41.6, 39.8, 28.5, 20.4, 10.9.

**HRMS (ESI): *m/z*:** [M+H]<sup>+</sup> Calcd. for C<sub>33</sub>H<sub>30</sub>N<sub>3</sub>O<sub>6</sub><sup>+</sup>: 564.2135; Found: 564.2132.

**7,17-dicyclohexyl-5-methyl-5b,8a-dihydro-5H,6H-5a,8b-[3,4]epipyrrolo-naphtho[2,3-c]pyrrolo[3,4-a]carbazole-6,8,9,14,16,18(7H)-hexaone (5d)**

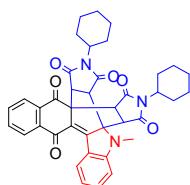

Yield: 72 %, 70 mg; red soild; m.p. 296-300 °C; R<sub>f</sub> = 0.63 (PE:EA=1:1).

**<sup>1</sup>H NMR (400 MHz, DMSO-*d*<sub>6</sub>):** δ 8.97 (d, *J* = 8.0 Hz, 1H), 8.17 (td, *J* = 4.4, 2.4 Hz, 2H), 7.90 – 7.84 (m, 2H), 7.47 – 7.42 (m, 1H), 6.86 (d, *J* = 8.4 Hz, 1H), 6.66 (t, *J* = 7.6 Hz, 1H), 3.90 (d, *J* = 8.5 Hz, 2H), 3.75 (d, *J* = 8.5 Hz, 2H), 3.35 (s, 3H), 1.53 – 1.26 (m, 11H), 1.02 – 0.73 (m, 11H).

**<sup>13</sup>C NMR (101 MHz, DMSO-*d*<sub>6</sub>):** δ 194.4, 178.3, 175.4, 172.6, 158.8, 153.0, 136.9, 136.0, 135.5, 135.0, 133.9, 129.7, 127.7, 126.5, 119.7, 116.7, 116.2, 107.5, 72.4, 51.7, 50.9, 45.3, 41.1, 28.4, 28.1, 27.9, 25.4, 24.9.

**HRMS (ESI): m/z:** [M+H]<sup>+</sup> Calcd. for C<sub>39</sub>H<sub>38</sub>N<sub>3</sub>O<sub>6</sub><sup>+</sup>: 644.2761; Found: 644.2758.

**7,17-bis(4-methoxyphenyl)-5-methyl-5b,8a-dihydro-5H,6H-5a,8b-**

**[3,4]epipyrrolonaphtho[2,3-*c*]pyrrolo[3,4-*a*]carbazole-6,8,9,14,16,18(7H)-hexaone (5e)**

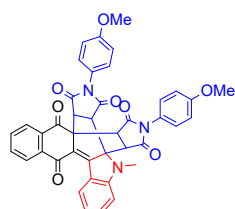

Yield: 57 %, 59 mg; red solid; m.p. 220-222 °C; R<sub>f</sub> = 0.14 (PE:EA=1:1).

**<sup>1</sup>H NMR (400 MHz, DMSO-*d*<sub>6</sub>):** δ 9.13 (d, *J* = 7.9 Hz, 1H), 8.18 (ddd, *J* = 4.9, 2.3, 0.9 Hz, 2H), 7.87 – 7.82 (m, 2H), 7.47 (ddd, *J* = 8.4, 7.1, 1.3 Hz, 1H), 6.88 (d, *J* = 8.4 Hz, 1H), 6.86 – 6.80 (m, 4H), 6.76 – 6.72 (m, 1H), 6.54 – 6.47 (m, 4H), 4.23 (d, *J* = 8.5 Hz, 2H), 4.01 (d, *J* = 8.5 Hz, 2H), 3.63 (s, 6H), 3.41 (s, 3H).

**<sup>13</sup>C NMR (101 MHz, DMSO-*d*<sub>6</sub>):** δ 194.2, 178.5, 174.9, 172.2, 159.5, 159.0, 153.5, 137.2, 136.0, 135.4, 135.1, 134.0, 129.7, 127.8, 127.8, 126.6, 124.2, 119.5, 117.1, 116.4, 114.8, 107.8, 72.7, 55.8, 51.9, 45.8, 41.7, 28.6.

**HRMS (ESI): m/z:** [M+Na]<sup>+</sup> Calcd. for C<sub>41</sub>H<sub>29</sub>N<sub>3</sub>NaO<sub>8</sub><sup>+</sup>: 714.1847; Found: 714.1881.

**5-methyl-7,17-bis(4-(methylthio)phenyl)-5b,8a-dihydro-5H,6H-5a,8b-**

**[3,4]epipyrrolonaphtho[2,3-*c*]pyrrolo[3,4-*a*]carbazole-6,8,9,14,16,18(7H)-hexaone (5f)**

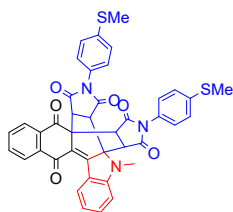

Yield: 51 %, 55 mg; red soild; m.p. 241-244 °C; Rf = 0.16 (PE:EA=1:1).

**<sup>1</sup>H NMR (400 MHz, DMSO-*d*<sub>6</sub>):** δ 9.12 (d, *J* = 8.1 Hz, 1H), 8.18 (dd, *J* = 5.5, 2.6 Hz, 2H), 7.85 (p, *J* = 7.2 Hz, 2H), 7.48 (t, *J* = 7.6 Hz, 1H), 7.17 (d, *J* = 8.6 Hz, 4H), 6.89 (d, *J* = 8.4 Hz, 1H), 6.74 (t, *J* = 7.6 Hz, 1H), 6.53 (d, *J* = 8.6 Hz, 4H), 4.26 (d, *J* = 8.5 Hz, 2H), 4.02 (d, *J* = 8.5 Hz, 2H), 3.41 (s, 3H), 2.36 (s, 6H).

**<sup>13</sup>C NMR (101 MHz, DMSO-*d*<sub>6</sub>):** δ 194.1, 178.5, 174.7, 172.0, 159.0, 153.5, 139.8, 137.3, 136.0, 135.3, 135.1, 134.1, 129.7, 128.2, 127.8, 127.0, 126.6, 126.5, 119.4, 117.2, 116.3, 107.8, 72.7, 51.9, 45.9, 41.7, 28.6, 14.9.

**HRMS (ESI):** *m/z*: [M+H]<sup>+</sup> Calcd. for C<sub>41</sub>H<sub>30</sub>N<sub>3</sub>O<sub>6</sub>S<sub>2</sub><sup>+</sup>: 724.1576; Found: 724.1575.

**7,17-bis(4-bromophenyl)-5-methyl-5b,8a-dihydro-5H,6H-5a,8b-[3,4]epipyrrolo-naphtho[2,3-c]pyrrolo[3,4-a]carbazole-6,8,9,14,16,18(7H)-hexaone (5g)**

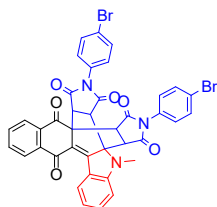

Yield: 80 %, 95 mg; red soild; m.p. 233-237 °C; Rf = 0.34 (PE:EA=1:1).

**<sup>1</sup>H NMR (400 MHz, DMSO-*d*<sub>6</sub>):** δ 9.10 (d, *J* = 8.1 Hz, 1H), 8.22 – 8.14 (m, 2H), 7.89 – 7.83 (m, 2H), 7.59 – 7.50 (m, 4H), 7.50 – 7.45 (m, 1H), 6.90 (d, *J* = 8.4 Hz, 1H), 6.74 (t, *J* = 7.6 Hz, 1H), 6.62 – 6.52 (m, 4H), 4.29 (d, *J* = 8.6 Hz, 2H), 4.03 (d, *J* = 8.6 Hz, 2H), 3.41 (s, 3H).

**<sup>13</sup>C NMR (101 MHz, DMSO-*d*<sub>6</sub>):** δ 194.0, 178.5, 174.4, 171.7, 159.0, 153.4, 137.4, 135.9, 135.3, 135.2, 134.1, 132.6, 130.9, 129.7, 128.6, 127.8, 126.6, 122.2, 119.3, 117.3, 116.3, 107.8, 72.6, 51.8, 46.0, 41.8, 28.6.

**HRMS (ESI): m/z:**  $[M+H]^+$  Calcd. for  $C_{39}H_{24}Br_2N_3O_6^+$ : 790.0006; Found: 790.0038.

**4,4'-(5-methyl-6,8,9,14,16,18-hexaoxo-5b,6,8,8a,9,14-hexahydro-5H,7H-5a,8b-[3,4]epipyrrolonaphtho[2,3-c]pyrrolo[3,4-a]carbazole-7,17-diyl)dibenzonitrile (5h)**

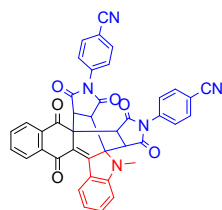

Yield: 72 %, 74 mg; red soild; m.p. 260-263 °C; Rf = 0.11 (PE:EA=1:1).

**$^1H$  NMR (400 MHz, DMSO- $d_6$ ):**  $\delta$  9.10 (d,  $J$  = 8.1 Hz, 1H), 8.20 (ddd,  $J$  = 6.7, 3.6, 1.5 Hz, 2H), 7.89 (m, 7.92-7.87 Hz, 2H), 7.83 (d,  $J$  = 8.5 Hz, 4H), 7.51 (t,  $J$  = 7.7 Hz, 1H), 6.93 (d,  $J$  = 8.4 Hz, 1H), 6.84 (d,  $J$  = 8.5 Hz, 4H), 6.76 (t,  $J$  = 7.6 Hz, 1H), 4.36 (d,  $J$  = 8.6 Hz, 2H), 4.08 (d,  $J$  = 8.6 Hz, 2H), 3.44 (s, 3H).

**$^{13}C$  NMR (101 MHz, DMSO- $d_6$ ):**  $\delta$  193.9, 178.4, 174.2, 171.5, 159.0, 153.4, 137.5, 135.9, 135.5, 135.3, 135.2, 134.2, 133.8, 129.7, 127.9, 127.3, 126.7, 119.2, 118.4, 117.4, 116.2, 111.8, 107.9, 72.6, 51.8, 46.0, 41.8, 28.6.

**HRMS (ESI): m/z:**  $[M+H]^+$  Calcd. for  $C_{41}H_{24}N_5O_6^+$ : 682.1727; Found: 682.1726.

**dimethyl 4,4'-(5-methyl-6,8,9,14,16,18-hexaoxo-5b,6,8,8a,9,14-hexahydro-5H,7H-5a,8b-[3,4]epipyrrolonaphtho[2,3-c]pyrrolo[3,4-a]carbazole-7,17-diyl)dibenzoate (5i)**

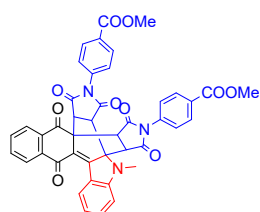

Yield: 69 %, 77 mg; red soild; m.p. 252-256 °C; Rf = 0.18 (PE:EA=1:1).

**$^1H$  NMR (400 MHz, DMSO- $d_6$ ):**  $\delta$  9.12 (d,  $J$  = 8.1 Hz, 1H), 8.22 – 8.18 (m, 2H), 7.93 – 7.85 (m, 6H), 7.50 (ddd,  $J$  = 8.3, 7.1, 1.3 Hz, 1H), 6.92 (d,  $J$  = 8.4 Hz, 1H), 6.85 –

6.79 (m, 4H), 6.76 (dd,  $J = 11.3, 4.0$  Hz, 1H), 4.35 (d,  $J = 8.6$  Hz, 2H), 4.08 (d,  $J = 8.6$  Hz, 2H), 3.79 (s, 6H), 3.45 (s, 3H).

$^{13}\text{C}$  NMR (101 MHz, DMSO- $d_6$ ):  $\delta$  194.0, 178.4, 174.3, 171.7, 165.7, 159.0, 153.5, 137.4, 135.9, 135.7, 135.3, 134.2, 130.4, 130.0, 129.8, 127.9, 126.8, 126.6, 119.3, 117.3, 116.3, 107.9, 72.7, 52.8, 51.8, 46.1, 41.9, 28.6.

HRMS (ESI):  $m/z$ :  $[\text{M}+\text{H}]^+$  Calcd. for  $\text{C}_{43}\text{H}_{30}\text{N}_3\text{O}_{10}^+$ : 748.1931; Found: 748.1929.

**5-methyl-7,17-di-*o*-tolyl-5b,8a-dihydro-5H,6H-5a,8b-[3,4]epipyrrolonaphtho[2,3-c]pyrrolo[3,4-a]carbazole-6,8,9,14,16,18(7H)-hexaone (5j)**

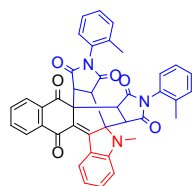

Yield: 68 %, 68 mg; red soild; m.p. 287-289 °C;  $R_f = 0.26$  (PE:EA=1:1).

$^1\text{H}$  NMR (400 MHz,  $\text{CDCl}_3$ ):  $\delta$  9.48 – 9.16 (m, 1H), 8.33 (dd,  $J = 14.1, 7.7$  Hz, 2H), 7.85 – 7.76 (m, 1H), 7.75 – 7.67 (m, 1H), 7.47 (t,  $J = 7.7$  Hz, 1H), 7.22 – 6.98 (m, 6H), 6.94 – 6.24 (m, 4H), 4.20 – 4.06 (m, 2H), 3.69 – 3.57 (m, 2H), 3.34 – 3.20 (m, 3H), 2.09 – 1.43 (m, 6H).

$^{13}\text{C}$  NMR (101 MHz,  $\text{CDCl}_3$ ):  $\delta$  194.6, 194.6, 178.6, 178.6, 174.1, 173.8, 170.7, 170.6, 158.7, 153.2, 137.4, 137.3, 136.4, 136.3, 136.1, 136.0, 135.1, 135.1, 135.0, 133.6, 131.2, 131.0, 130.8, 130.6, 130.1, 130.1, 129.9, 129.7, 128.3, 127.5, 127.4, 127.3, 126.8, 126.8, 126.3, 120.0, 119.7, 117.9, 117.8, 116.5, 116.3, 107.2, 107.2, 77.4, 77.0, 76.7, 72.1, 71.9, 51.8, 51.7, 45.8, 45.6, 45.5, 42.6, 42.5, 42.5, 28.2, 28.1, 28.1, 17.4, 17.2, 17.2.

HRMS (ESI):  $m/z$ :  $[\text{M}+\text{H}]^+$  Calcd. for  $\text{C}_{41}\text{H}_{30}\text{N}_3\text{O}_6^+$ : 660.2135; Found: 660.2134.

**methyl 4-(7-(3-(methoxycarbonyl)thiophen-2-yl)-5-methyl-6,8,9,14,16,18-hexaoxo-5b,7,8,8a,9,14-hexahydro-5H,6H-5a,8b-[3,4]epipyrrolonaphtho[2,3-c]pyrrolo[3,4-a]carbazol-17-yl)thiophene-3-carboxylate (5k)**

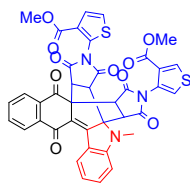

Yield: 54 %, 62 mg; red soild; m.p. 208-219 °C; Rf = 0.2 (PE:EA=1:1).

**<sup>1</sup>H NMR (400 MHz, CDCl<sub>3</sub>):** δ 9.27 (d, *J* = 8.1 Hz, 1H), 8.36 – 8.31 (m, 1H), 8.31 – 8.26 (m, 1H), 7.76 – 7.69 (m, 2H), 7.46 (t, *J* = 7.5 Hz, 1H), 7.33 (d, *J* = 5.3 Hz, 2H), 6.84 – 6.75 (m, 2H), 6.35 (d, *J* = 5.0 Hz, 2H), 4.16 (d, *J* = 8.9 Hz, 2H), 3.76 (d, *J* = 8.9 Hz, 2H), 3.68 (s, 6H), 3.44 (s, 3H).

**<sup>13</sup>C NMR (101 MHz, CDCl<sub>3</sub>):** δ 193.5, 178.9, 172.2, 169.7, 160.0, 158.6, 152.2, 137.1, 136.3, 134.9, 134.6, 133.4, 132.5, 130.5, 130.5, 128.0, 127.0, 126.8, 126.7, 117.8, 116.8, 107.1, 72.0, 52.2, 51.6, 45.7, 42.6, 28.3.

**HRMS (ESI): m/z:** [M+H]<sup>+</sup> Calcd. for C<sub>39</sub>H<sub>26</sub>N<sub>3</sub>O<sub>10</sub>S<sub>2</sub><sup>+</sup>: 760.1060; Found: 760.1063.

**7,17-bis(2-(2,5-dioxo-2,5-dihydro-1H-pyrrol-1-yl)ethyl)-5-methyl-5b,8a-dihydro-5H,6H-5a,8b-[3,4]epipyrrolonaphtho[2,3-c]pyrrolo[3,4-a]carbazole-6,8,9,14,16,18(7H)-hexaone (5I)**

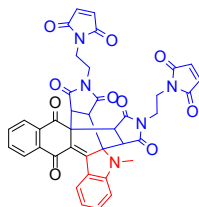

Yield: 51 %, 55 mg; red soild; m.p. 283-287 °C; Rf = 0.13 (PE:EA=1:1).

**<sup>1</sup>H NMR (400 MHz, DMSO-*d*<sub>6</sub>):** δ 8.96 (d, *J* = 7.9 Hz, 1H), 8.20 – 8.14 (m, 2H), 7.91 – 7.86 (m, 2H), 7.47 – 7.42 (m, 1H), 6.87 (d, *J* = 10.5 Hz, 5H), 6.67 (t, *J* = 7.4 Hz, 1H), 4.03 (d, *J* = 8.7 Hz, 2H), 3.73 (d, *J* = 8.7 Hz, 2H), 3.35 (s, 3H), 3.15 – 3.05 (m, 8H).

**<sup>13</sup>C NMR (101 MHz, DMSO-*d*<sub>6</sub>):** δ 193.8, 178.1, 175.0, 172.5, 171.0, 158.7, 152.9, 137.0, 136.2, 135.2, 135.0, 134.9, 134.0, 130.3, 127.9, 126.6, 119.3, 117.0, 115.9, 107.6, 71.9, 51.1, 45.5, 41.4, 36.9, 34.5, 28.5.

**HRMS (ESI): m/z:** [M+H]<sup>+</sup> Calcd. for C<sub>39</sub>H<sub>28</sub>N<sub>5</sub>O<sub>10</sub><sup>+</sup>: 726.1836; Found: 726.1830.

**7,17-bis(2-(2-(2-methoxyethoxy)ethoxy)ethyl)-5-methyl-5b,8a-dihydro-5H,6H-5a,8b-[3,4]epipyrrolonaphtho[2,3-c]pyrrolo[3,4-a]carbazole-6,8,9,14,16,18(7H)-hexaone (5m)**

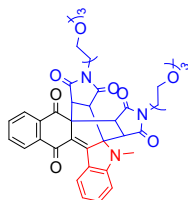

Yield: 44 %, 51 mg; red soild; m.p. 200-202 °C; Rf = 0.14 (PE:EA=1:3).

**<sup>1</sup>H NMR (400 MHz, CDCl<sub>3</sub>):** δ 9.16 (d, *J* = 8.1 Hz, 1H), 8.39 – 8.34 (m, 1H), 8.30 – 8.26 (m, 1H), 7.79 (p, *J* = 5.7 Hz, 2H), 7.47 (t, *J* = 7.7 Hz, 1H), 6.76 (dd, *J* = 14.5, 7.7 Hz, 2H), 3.87 (d, *J* = 8.7 Hz, 2H), 3.53 – 3.45 (m, 10H), 3.43 (s, 3H), 3.40 – 3.32 (m, 10H), 3.32 – 3.23 (m, 8H), 3.12 (t, *J* = 5.6 Hz, 4H).

**<sup>13</sup>C NMR (101 MHz, CDCl<sub>3</sub>):** δ 193.8, 178.4, 173.8, 171.3, 158.5, 152.1, 136.9, 136.1, 135.0, 134.6, 133.5, 130.5, 127.9, 126.7, 119.6, 117.4, 116.2, 106.8, 71.8, 71.7, 70.3, 69.9, 66.5, 59.0, 51.3, 45.2, 42.1, 38.3, 28.2.

**HRMS (ESI): m/z:** [M+H]<sup>+</sup> Calcd. for C<sub>41</sub>H<sub>46</sub>N<sub>3</sub>O<sub>12</sub><sup>+</sup>: 772.3081; Found: 772.3080.

**7-cyclohexyl-5-methyl-17-phenyl-5b,8a-dihydro-5H,6H-5a,8b-[3,4]epipyrrolonaphtho[2,3-c]pyrrolo[3,4-a]carbazole-6,8,9,14,16,18(7H)-hexaone (5n)**

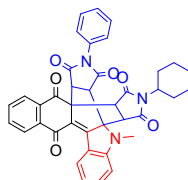

Yield: 30 %, 57 mg; red soild; m.p. 294-296 °C; Rf = 0.4 (PE:EA=1:1).

**<sup>1</sup>H NMR (400 MHz, DMSO-*d*<sub>6</sub>):** δ 9.07 (d, *J* = 8.1 Hz, 1H), 8.23 – 8.16 (m, 2H), 7.91 – 7.84 (m, 2H), 7.48 (ddd, *J* = 8.3, 7.1, 1.2 Hz, 1H), 7.32 – 7.22 (m, 3H), 6.89 (d, *J* = 8.4 Hz, 1H), 6.72 (dd, *J* = 11.3, 4.0 Hz, 1H), 6.62 – 6.55 (m, 2H), 4.18 (d, *J* = 8.5 Hz, 1H), 4.03 (d, *J* = 8.5 Hz, 1H), 3.97 (d, *J* = 8.5 Hz, 1H), 3.86 (d, *J* = 8.4 Hz, 1H), 3.40 (s, 3H), 1.53 – 1.36 (m, 5H), 1.08 – 0.71 (m, 6H).

**<sup>13</sup>C NMR (101 MHz, DMSO-*d*<sub>6</sub>):** δ 194.2, 178.4, 175.4, 174.7, 172.7, 172.0, 158.9,

153.3, 137.1, 136.0, 135.4, 135.1, 134.0, 131.7, 129.7, 129.4, 129.1, 127.8, 126.6, 126.5, 119.6, 117.0, 116.3, 107.7, 72.6, 51.8, 50.9, 45.9, 45.3, 41.8, 41.1, 28.5, 28.1, 27.9, 25.4, 24.9.

**HRMS (ESI): m/z:** [M+H]<sup>+</sup> Calcd. for C<sub>39</sub>H<sub>32</sub>N<sub>3</sub>O<sub>6</sub><sup>+</sup>: 638.2291; Found: 638.2291.

**7-cyclohexyl-5-methyl-5b,8a-dihydro-5H,6H-5a,8b-[3,4]epipyrrolonaphtho[2,3-c]pyrrolo[3,4-a]carbazole-6,8,9,14,16,18(7H)-hexaone (5o)**

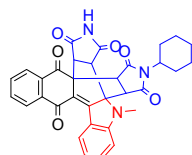

Yield: 37 %, 62 mg; red solid; m.p. 212-217 °C; R<sub>f</sub> = 0.34 (PE:EA=1:1).

**<sup>1</sup>H NMR (400 MHz, DMSO-d<sub>6</sub>):** δ 11.14 (s, 1H), 9.07 (d, *J* = 7.9 Hz, 1H), 8.25 – 8.18 (m, 2H), 7.95 – 7.89 (m, 2H), 7.52 – 7.47 (m, 1H), 6.91 (d, *J* = 8.4 Hz, 1H), 6.72 (t, *J* = 7.4 Hz, 1H), 3.94 (dd, *J* = 15.9, 8.5 Hz, 2H), 3.79 (dd, *J* = 8.5, 3.7 Hz, 2H), 3.38 (s, 3H), 1.55 – 1.37 (m, 5H), 1.11 – 0.75 (m, 6H).

**<sup>13</sup>C NMR (101 MHz, DMSO-d<sub>6</sub>):** δ 194.3, 178.5, 176.8, 175.4, 174.3, 172.7, 158.9, 153.3, 136.9, 136.1, 135.4, 134.9, 133.9, 129.8, 127.7, 126.5, 119.6, 116.7, 116.4, 107.6, 72.3, 51.4, 50.9, 46.8, 45.6, 42.7, 41.3, 28.5, 28.0, 27.9, 25.4, 24.9.

**HRMS (ESI): m/z:** [M+H]<sup>+</sup> Calcd. for C<sub>33</sub>H<sub>28</sub>N<sub>3</sub>O<sub>6</sub><sup>+</sup>: 562.1978; Found: 562.1976.

### 3.6 X-Ray Diffraction Analysis

Compound **4a** X-Ray crystal diffraction data: Single crystals of **4a** were grown in slowly diffusion with acetone as red needle-shaped crystals. A suitable crystal was collected on a Xcalibur, Eos diffractometer. The crystal was kept at 293.15 K during data collection. Using Olex2, the structure was solved with the ShelXT structure solution program using Intrinsic Phasing and refined with the ShelXL refinement package using Least Squares minimisation. Crystallographic data for the structure reported in this paper have been deposited at the Cambridge Crystallographic Data Center and allocated



with the deposition numbers: CCDC 2091590 for compounds **4a**.

Crystal structure determination of **4a**:

Crystal Data for **4a** ( $C_{42}H_{31}N_3O_7$ ,  $M = 689.70$  g/mol): triclinic, space group P-1 (no. 2),  $a = 10.0108(6)$  Å,  $b = 12.3924(11)$  Å,  $c = 15.3068(16)$  Å,  $\alpha = 70.467(9)^\circ$ ,  $\beta = 88.314(7)^\circ$ ,  $\gamma = 74.969(6)^\circ$ ,  $V = 1725.0(3)$  Å<sup>3</sup>,  $Z = 2$ ,  $T = 293.15$  K,  $\mu(\text{MoK}\alpha) = 0.091$  mm<sup>-1</sup>,  $D_{\text{calc}} = 1.328$  g/cm<sup>3</sup>, 14135 reflections measured ( $6.022^\circ \leq 2\theta \leq 52.734^\circ$ ), 7039 unique ( $R_{\text{int}} = 0.0474$ ,  $R_{\text{sigma}} = 0.1227$ ) which were used in all calculations. The final  $R_1$  was 0.0620 ( $I > 2\sigma(I)$ ) and  $wR_2$  was 0.1572.

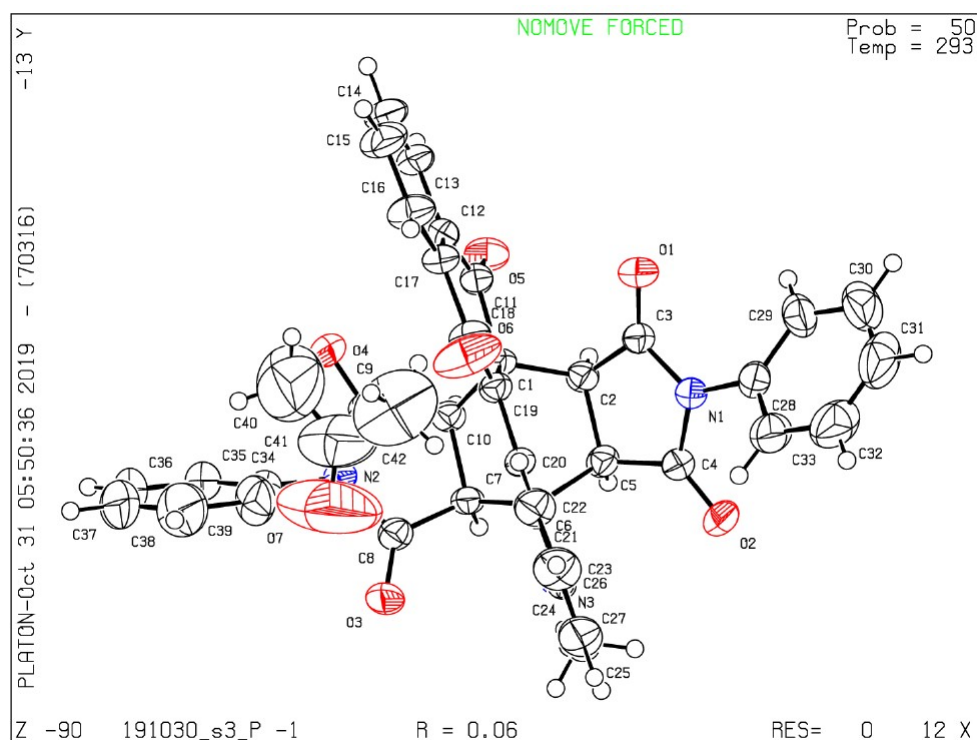

**Table S6** Crystal data and structure refinement for **4a**

|                     |                      |
|---------------------|----------------------|
| Identification code | <b>4a</b>            |
| Empirical formula   | $C_{42}H_{31}N_3O_7$ |
| Formula weight      | 689.70               |
| Temperature/K       | 293.15               |
| Crystal system      | triclinic            |
| Space group         | P-1                  |

|                                                |                                                               |
|------------------------------------------------|---------------------------------------------------------------|
| $a/\text{\AA}$                                 | 10.0108(6)                                                    |
| $b/\text{\AA}$                                 | 12.3924(11)                                                   |
| $c/\text{\AA}$                                 | 15.3068(16)                                                   |
| $\alpha/^\circ$                                | 70.467(9)                                                     |
| $\beta/^\circ$                                 | 88.314(7)                                                     |
| $\gamma/^\circ$                                | 74.969(6)                                                     |
| Volume/ $\text{\AA}^3$                         | 1725.0(3)                                                     |
| Z                                              | 2                                                             |
| $\rho_{\text{calc}}/\text{g/cm}^3$             | 1.328                                                         |
| $\mu/\text{mm}^{-1}$                           | 0.091                                                         |
| F(000)                                         | 720.0                                                         |
| Crystal size/ $\text{mm}^3$                    | $0.35 \times 0.3 \times 0.25$                                 |
| Radiation                                      | MoK $\alpha$ ( $\lambda = 0.71073$ )                          |
| 2 $\Theta$ range for data collection/ $^\circ$ | 6.022 to 52.734                                               |
| Index ranges                                   | $-12 \leq h \leq 12, -14 \leq k \leq 15, -19 \leq l \leq 19$  |
| Reflections collected                          | 14135                                                         |
| Independent reflections                        | 7039 [ $R_{\text{int}} = 0.0474, R_{\text{sigma}} = 0.1227$ ] |
| Data/restraints/parameters                     | 7039/0/472                                                    |
| Goodness-of-fit on $F^2$                       | 0.949                                                         |
| Final R indexes [ $I \geq 2\sigma(I)$ ]        | $R_1 = 0.0620, wR_2 = 0.1212$                                 |
| Final R indexes [all data]                     | $R_1 = 0.1408, wR_2 = 0.1572$                                 |
| Largest diff. peak/hole / $e \text{\AA}^{-3}$  | 0.24/-0.26                                                    |

**Table S7** Fractional Atomic Coordinates ( $\times 10^4$ ) and Equivalent Isotropic Displacement Parameters ( $\text{\AA}^2 \times 10^3$ ) for **4a**.  $U_{\text{eq}}$  is defined as 1/3 of of the trace of the orthogonalised UIJ tensor.

| Atom | $x$        | $y$        | $z$        | $U(\text{eq})$ |
|------|------------|------------|------------|----------------|
| O1   | 7163.0(19) | 5464.6(19) | 1752.8(16) | 58.5(6)        |
| O2   | 3291(2)    | 5024.0(19) | 573.7(15)  | 55.1(6)        |

|       |            |             |            |          |
|-------|------------|-------------|------------|----------|
| O3    | 402.7(19)  | 9606.5(19)  | 1197.3(15) | 55.0(6)  |
| O4    | 4591.3(19) | 10344.5(19) | 1386.2(15) | 51.9(6)  |
| O5    | 7065.7(18) | 8439.2(19)  | 710.8(14)  | 49.5(6)  |
| O6    | 4618(2)    | 6588(3)     | 3839.0(15) | 84.0(9)  |
| N1    | 5280(2)    | 4954(2)     | 1340.3(16) | 39.0(6)  |
| N2    | 2375(2)    | 10126(2)    | 1423.7(16) | 37.2(6)  |
| N3    | 1448(2)    | 7091(2)     | 1077.6(16) | 37.4(6)  |
| C1    | 5073(2)    | 7824(2)     | 1315.5(18) | 31.4(6)  |
| C2    | 5252(2)    | 6980(2)     | 743.7(18)  | 34.0(7)  |
| C3    | 6056(3)    | 5747(3)     | 1330(2)    | 38.0(7)  |
| C4    | 4051(3)    | 5522(3)     | 788(2)     | 39.3(7)  |
| C5    | 3854(2)    | 6845(2)     | 498.4(19)  | 35.3(7)  |
| C6    | 2727(2)    | 7432(2)     | 1048.5(19) | 32.3(7)  |
| C7    | 2589(2)    | 8774(2)     | 620.6(19)  | 33.3(7)  |
| C8    | 1622(3)    | 9516(3)     | 1105.2(19) | 36.9(7)  |
| C9    | 3744(3)    | 9896(3)     | 1200(2)    | 38.2(7)  |
| C10   | 4009(2)    | 8997(2)     | 713.2(18)  | 32.8(7)  |
| C11   | 6459(3)    | 8115(3)     | 1408(2)    | 36.1(7)  |
| C12   | 6993(3)    | 7973(2)     | 2331(2)    | 35.9(7)  |
| C13   | 8178(3)    | 8355(3)     | 2398(2)    | 48.4(8)  |
| C14   | 8723(3)    | 8209(3)     | 3256(3)    | 61.5(10) |
| C15   | 8119(3)    | 7703(3)     | 4050(3)    | 64.2(10) |
| C16   | 6946(3)    | 7323(3)     | 3993(2)    | 58.1(9)  |
| C17   | 6371(3)    | 7469(3)     | 3135(2)    | 40.0(7)  |
| C18   | 5097(3)    | 7048(3)     | 3112(2)    | 43.7(8)  |
| <hr/> |            |             |            |          |
| C19   | 4450(3)    | 7276(2)     | 2207.9(18) | 32.7(6)  |

|     |         |          |            |           |
|-----|---------|----------|------------|-----------|
| C20 | 3237(2) | 7009(2)  | 2063.9(18) | 31.8(6)   |
| C21 | 2278(3) | 6397(2)  | 2599(2)    | 35.2(7)   |
| C22 | 2226(3) | 5776(3)  | 3540(2)    | 48.6(8)   |
| C23 | 1161(3) | 5250(3)  | 3823(3)    | 62.2(10)  |
| C24 | 156(3)  | 5334(3)  | 3183(3)    | 61.8(10)  |
| C25 | 178(3)  | 5911(3)  | 2257(3)    | 49.2(8)   |
| C26 | 1246(3) | 6456(2)  | 1967(2)    | 36.9(7)   |
| C27 | 570(3)  | 7326(3)  | 267(2)     | 52.9(9)   |
| C28 | 5691(3) | 3696(3)  | 1802(2)    | 47.1(8)   |
| C29 | 7031(3) | 3053(3)  | 1761(2)    | 61.0(10)  |
| C30 | 7372(5) | 1836(4)  | 2175(3)    | 84.8(14)  |
| C31 | 6398(6) | 1284(4)  | 2599(3)    | 103.9(18) |
| C32 | 5067(5) | 1918(4)  | 2651(3)    | 92.2(15)  |
| C33 | 4721(4) | 3143(3)  | 2250(3)    | 66.3(10)  |
| C34 | 1807(3) | 10907(3) | 1927(2)    | 43.2(8)   |
| C35 | 1728(3) | 12100(3) | 1529(3)    | 57.4(9)   |
| C36 | 1185(4) | 12848(4) | 2021(3)    | 80.2(13)  |
| C37 | 736(4)  | 12422(5) | 2878(4)    | 98.5(17)  |
| C38 | 823(4)  | 11220(5) | 3270(3)    | 92.4(14)  |
| C39 | 1366(3) | 10455(4) | 2797(2)    | 65.5(10)  |
| O7  | 1169(5) | 7859(7)  | 4977(4)    | 267(4)    |
| C40 | 3202(8) | 8353(7)  | 5118(5)    | 190(3)    |
| C41 | 2323(7) | 7543(10) | 5267(5)    | 147(3)    |
| C42 | 3052(8) | 6300(7)  | 5827(4)    | 164(3)    |

**Table S7** Anisotropic Displacement Parameters ( $\text{\AA}^2 \times 10^3$ ) for **4a**. The Anisotropic displacement factor exponent takes the form:  $-2\pi^2[h^2a^{*2}U_{11}+2hka^*b^*U_{12}+\dots]$ .

| <b>Atom</b> | <b>U<sub>11</sub></b> | <b>U<sub>22</sub></b> | <b>U<sub>33</sub></b> | <b>U<sub>23</sub></b> | <b>U<sub>13</sub></b> | <b>U<sub>12</sub></b> |
|-------------|-----------------------|-----------------------|-----------------------|-----------------------|-----------------------|-----------------------|
| O1          | 33.1(12)              | 58.1(16)              | 88.6(17)              | -33.2(14)             | -13.3(11)             | -6.5(11)              |
| O2          | 49.1(13)              | 49.4(14)              | 75.3(16)              | -31.5(13)             | -16.1(11)             | -11.7(11)             |
| O3          | 27.5(11)              | 54.1(15)              | 92.7(18)              | -33.7(13)             | 13.2(11)              | -16.0(10)             |
| O4          | 38.3(12)              | 55.4(15)              | 78.1(16)              | -36.8(13)             | 5.9(11)               | -20.6(11)             |
| O5          | 33.5(11)              | 62.2(15)              | 54.9(14)              | -16.6(12)             | 12.1(10)              | -21.2(11)             |
| O6          | 82.5(17)              | 145(3)                | 43.0(14)              | -21.0(16)             | 11.2(12)              | -76.0(18)             |
| N1          | 32.4(13)              | 35.9(15)              | 50.2(15)              | -19.4(13)             | -6.4(11)              | -4.3(12)              |
| N2          | 28.1(13)              | 36.8(14)              | 49.9(15)              | -17.2(12)             | 2.8(11)               | -11.0(11)             |
| N3          | 27.9(12)              | 39.5(15)              | 50.8(15)              | -16.1(13)             | -1.1(11)              | -17.4(11)             |
| C1          | 24.9(14)              | 35.4(16)              | 35.8(16)              | -11.5(13)             | 3.7(11)               | -12.3(13)             |
| C2          | 28.8(15)              | 40.8(18)              | 38.1(16)              | -18.7(14)             | 8.5(12)               | -12.5(13)             |
| C3          | 29.3(16)              | 44.6(19)              | 48.1(18)              | -26.0(16)             | 3.8(14)               | -9.9(14)              |
| C4          | 32.8(16)              | 42.7(19)              | 47.8(19)              | -22.8(16)             | -0.6(14)              | -8.5(15)              |
| C5          | 34.2(16)              | 42.5(18)              | 35.7(16)              | -19.7(14)             | 3.3(12)               | -12.7(14)             |
| C6          | 21.1(14)              | 33.1(16)              | 44.2(17)              | -12.8(14)             | -1.6(12)              | -9.5(12)              |
| C7          | 25.1(14)              | 32.3(16)              | 41.4(16)              | -9.8(14)              | -1.0(12)              | -9.2(12)              |
| C8          | 34.1(17)              | 33.3(17)              | 43.1(17)              | -9.6(14)              | 4.0(13)               | -13.3(14)             |
| C9          | 32.0(16)              | 35.2(17)              | 47.7(18)              | -11.0(15)             | -0.4(13)              | -12.9(14)             |
| C10         | 29.0(15)              | 33.4(17)              | 36.5(16)              | -9.1(14)              | 6.5(12)               | -13.2(13)             |
| C11         | 29.3(15)              | 36.1(17)              | 47.0(18)              | -16.8(15)             | 8.1(14)               | -12.6(13)             |
| C12         | 24.2(14)              | 29.9(16)              | 53.8(19)              | -16.6(15)             | -0.7(13)              | -3.9(12)              |
| C13         | 33.8(17)              | 44(2)                 | 73(2)                 | -21.8(18)             | -2.7(16)              | -16.2(15)             |
| C14         | 41.1(19)              | 60(2)                 | 91(3)                 | -28(2)                | -13.2(19)             | -20.5(18)             |
| C15         | 55(2)                 | 73(3)                 | 70(3)                 | -26(2)                | -20.6(19)             | -21(2)                |
| C16         | 49(2)                 | 77(3)                 | 53(2)                 | -22(2)                | -7.9(16)              | -22.8(19)             |
| C17         | 30.9(16)              | 45.3(19)              | 45.6(18)              | -17.2(15)             | -5.9(13)              | -10.0(14)             |
| C18         | 36.5(17)              | 61(2)                 | 40.0(18)              | -18.9(16)             | 4.4(14)               | -21.3(16)             |

|     |          |          |          |           |           |           |
|-----|----------|----------|----------|-----------|-----------|-----------|
| C19 | 29.7(15) | 36.0(17) | 35.8(16) | -13.6(14) | 4.6(12)   | -12.9(13) |
| C20 | 25.9(14) | 32.7(16) | 41.3(17) | -15.8(13) | 3.7(12)   | -10.9(12) |
| C21 | 28.0(15) | 30.6(17) | 48.2(18) | -11.4(14) | 5.6(13)   | -12.6(13) |
| C22 | 43.8(18) | 43(2)    | 55(2)    | -7.8(16)  | 8.3(15)   | -17.2(16) |
| C23 | 55(2)    | 61(2)    | 69(2)    | -12(2)    | 19.4(18)  | -26.7(19) |
| C24 | 45(2)    | 52(2)    | 94(3)    | -21(2)    | 26(2)     | -28.2(18) |
| C25 | 32.6(17) | 40.6(19) | 86(3)    | -29.4(19) | 12.1(16)  | -19.3(15) |
| C26 | 29.8(15) | 28.3(16) | 54.0(19) | -15.7(15) | 5.0(14)   | -8.1(13)  |
| C27 | 39.7(18) | 60(2)    | 63(2)    | -23.4(19) | -10.1(16) | -16.5(16) |
| C28 | 47.3(19) | 36.9(19) | 60(2)    | -23.1(17) | -12.0(16) | -4.4(17)  |
| C29 | 59(2)    | 58(2)    | 67(2)    | -39(2)    | -14.1(18) | 8.6(19)   |
| C30 | 80(3)    | 68(3)    | 98(3)    | -44(3)    | -36(3)    | 21(3)     |
| C31 | 125(4)   | 47(3)    | 130(4)   | -31(3)    | -67(4)    | 4(3)      |
| C32 | 93(3)    | 53(3)    | 121(4)   | -12(3)    | -41(3)    | -21(3)    |
| C33 | 58(2)    | 41(2)    | 95(3)    | -15(2)    | -19(2)    | -11.1(19) |
| C34 | 32.1(16) | 45(2)    | 60(2)    | -27.0(18) | 5.5(14)   | -10.5(15) |
| C35 | 47.4(19) | 49(2)    | 82(3)    | -32(2)    | -0.4(17)  | -9.5(17)  |
| C36 | 62(3)    | 62(3)    | 134(4)   | -62(3)    | 1(3)      | -8(2)     |
| C37 | 72(3)    | 112(4)   | 153(5)   | -102(4)   | 20(3)     | -20(3)    |
| C38 | 88(3)    | 129(5)   | 90(3)    | -72(3)    | 33(2)     | -34(3)    |
| C39 | 73(2)    | 73(3)    | 64(2)    | -41(2)    | 26.3(19)  | -22(2)    |
| O7  | 96(3)    | 511(11)  | 242(6)   | -233(7)   | -22(3)    | -19(5)    |
| C40 | 207(8)   | 187(8)   | 182(7)   | -97(6)    | -49(6)    | -13(6)    |
| C41 | 95(5)    | 284(11)  | 100(5)   | -118(6)   | 12(4)     | -47(6)    |
| C42 | 201(7)   | 227(9)   | 81(4)    | -39(5)    | 35(4)     | -105(7)   |

---

**Table S8** Bond Lengths for **4a**

| Atom | Atom | Length/Å | Atom | Atom | Length/Å |
|------|------|----------|------|------|----------|
| O1   | C3   | 1.208(3) | C12  | C17  | 1.391(4) |
| O2   | C4   | 1.209(3) | C13  | C14  | 1.374(4) |
| O3   | C8   | 1.205(3) | C14  | C15  | 1.371(4) |
| O4   | C9   | 1.214(3) | C15  | C16  | 1.389(4) |
| O5   | C11  | 1.213(3) | C16  | C17  | 1.385(4) |
| O6   | C18  | 1.217(3) | C17  | C18  | 1.503(4) |
| N1   | C3   | 1.398(3) | C18  | C19  | 1.453(4) |
| N1   | C4   | 1.392(3) | C19  | C20  | 1.380(3) |
| N1   | C28  | 1.430(4) | C20  | C21  | 1.443(3) |
| N2   | C8   | 1.394(3) | C21  | C22  | 1.394(4) |
| N2   | C9   | 1.382(3) | C21  | C26  | 1.407(4) |
| N2   | C34  | 1.429(3) | C22  | C23  | 1.377(4) |
| N3   | C6   | 1.444(3) | C23  | C24  | 1.386(4) |
| N3   | C26  | 1.365(3) | C24  | C25  | 1.360(4) |
| N3   | C27  | 1.445(3) | C25  | C26  | 1.395(4) |
| C1   | C2   | 1.549(4) | C28  | C29  | 1.384(4) |
| C1   | C10  | 1.567(3) | C28  | C33  | 1.369(4) |
| C1   | C11  | 1.543(3) | C29  | C30  | 1.378(5) |
| C1   | C19  | 1.506(3) | C30  | C31  | 1.361(6) |
| C2   | C3   | 1.508(4) | C31  | C32  | 1.376(6) |
| C2   | C5   | 1.524(3) | C32  | C33  | 1.385(5) |
| C4   | C5   | 1.508(4) | C34  | C35  | 1.380(4) |
| C5   | C6   | 1.562(4) | C34  | C39  | 1.369(4) |
| C6   | C7   | 1.540(4) | C35  | C36  | 1.379(5) |
| C6   | C20  | 1.521(4) | C36  | C37  | 1.352(6) |
| C7   | C8   | 1.512(4) | C37  | C38  | 1.387(6) |

|     |     |          |     |     |          |
|-----|-----|----------|-----|-----|----------|
| C7  | C10 | 1.536(3) | C38 | C39 | 1.374(5) |
| C9  | C10 | 1.504(4) | O7  | C41 | 1.168(6) |
| C11 | C12 | 1.464(4) | C40 | C41 | 1.458(9) |
| C12 | C13 | 1.405(3) | C41 | C42 | 1.486(9) |

**Table S9** Bond Angles for **4a**

| Atom | Atom | Atom | Angle/°  | Atom | Atom | Atom | Angle/°  |
|------|------|------|----------|------|------|------|----------|
| C3   | N1   | C28  | 126.1(2) | C13  | C12  | C11  | 118.3(3) |
| C4   | N1   | C3   | 111.7(2) | C17  | C12  | C11  | 122.2(2) |
| C4   | N1   | C28  | 122.1(2) | C17  | C12  | C13  | 119.5(3) |
| C8   | N2   | C34  | 124.2(2) | C14  | C13  | C12  | 119.7(3) |
| C9   | N2   | C8   | 112.7(2) | C15  | C14  | C13  | 120.9(3) |
| C9   | N2   | C34  | 123.1(2) | C14  | C15  | C16  | 119.9(3) |
| C6   | N3   | C27  | 124.2(2) | C17  | C16  | C15  | 120.3(3) |
| C26  | N3   | C6   | 110.1(2) | C12  | C17  | C18  | 122.2(2) |
| C26  | N3   | C27  | 125.6(2) | C16  | C17  | C12  | 119.7(3) |
| C2   | C1   | C10  | 105.0(2) | C16  | C17  | C18  | 118.1(3) |
| C11  | C1   | C2   | 109.6(2) | O6   | C18  | C17  | 119.3(3) |
| C11  | C1   | C10  | 108.0(2) | O6   | C18  | C19  | 123.0(2) |
| C19  | C1   | C2   | 107.8(2) | C19  | C18  | C17  | 117.7(3) |
| C19  | C1   | C10  | 109.4(2) | C18  | C19  | C1   | 122.2(2) |
| C19  | C1   | C11  | 116.5(2) | C20  | C19  | C1   | 112.7(2) |
| C3   | C2   | C1   | 109.7(2) | C20  | C19  | C18  | 125.0(2) |
| C3   | C2   | C5   | 104.9(2) | C19  | C20  | C6   | 114.2(2) |
| C5   | C2   | C1   | 110.8(2) | C19  | C20  | C21  | 138.8(2) |
| O1   | C3   | N1   | 124.1(3) | C21  | C20  | C6   | 107.0(2) |
| O1   | C3   | C2   | 127.3(3) | C22  | C21  | C20  | 134.0(2) |
| N1   | C3   | C2   | 108.6(2) | C22  | C21  | C26  | 118.9(2) |



|     |     |     |          |     |     |     |           |
|-----|-----|-----|----------|-----|-----|-----|-----------|
| O2  | C4  | N1  | 125.0(3) | C26 | C21 | C20 | 107.1(2)  |
| O2  | C4  | C5  | 126.5(3) | C23 | C22 | C21 | 119.0(3)  |
| N1  | C4  | C5  | 108.5(2) | C22 | C23 | C24 | 120.5(3)  |
| C2  | C5  | C6  | 108.8(2) | C25 | C24 | C23 | 122.5(3)  |
| C4  | C5  | C2  | 104.5(2) | C24 | C25 | C26 | 117.2(3)  |
| C4  | C5  | C6  | 112.2(2) | N3  | C26 | C21 | 111.6(2)  |
| N3  | C6  | C5  | 114.0(2) | N3  | C26 | C25 | 126.6(3)  |
| N3  | C6  | C7  | 115.3(2) | C25 | C26 | C21 | 121.8(3)  |
| N3  | C6  | C20 | 104.0(2) | C29 | C28 | N1  | 120.1(3)  |
| C7  | C6  | C5  | 105.2(2) | C33 | C28 | N1  | 118.8(3)  |
| C20 | C6  | C5  | 109.5(2) | C33 | C28 | C29 | 121.0(3)  |
| C20 | C6  | C7  | 108.9(2) | C30 | C29 | C28 | 118.6(4)  |
| C8  | C7  | C6  | 114.2(2) | C31 | C30 | C29 | 120.4(4)  |
| C8  | C7  | C10 | 105.2(2) | C30 | C31 | C32 | 121.4(4)  |
| C10 | C7  | C6  | 108.8(2) | C31 | C32 | C33 | 118.6(4)  |
| O3  | C8  | N2  | 124.2(3) | C28 | C33 | C32 | 119.9(4)  |
| O3  | C8  | C7  | 127.6(3) | C35 | C34 | N2  | 119.2(3)  |
| N2  | C8  | C7  | 108.2(2) | C39 | C34 | N2  | 119.4(3)  |
| O4  | C9  | N2  | 124.7(3) | C39 | C34 | C35 | 121.5(3)  |
| O4  | C9  | C10 | 126.0(3) | C36 | C35 | C34 | 118.9(4)  |
| N2  | C9  | C10 | 109.3(2) | C37 | C36 | C35 | 120.7(4)  |
| C7  | C10 | C1  | 110.5(2) | C36 | C37 | C38 | 119.8(4)  |
| C9  | C10 | C1  | 110.1(2) | C39 | C38 | C37 | 120.7(4)  |
| C9  | C10 | C7  | 104.5(2) | C34 | C39 | C38 | 118.5(4)  |
| O5  | C11 | C1  | 118.3(2) | O7  | C41 | C40 | 122.5(10) |
| O5  | C11 | C12 | 123.0(2) | O7  | C41 | C42 | 124.7(9)  |
| C12 | C11 | C1  | 118.7(2) | C40 | C41 | C42 | 112.8(6)  |

**Table S10** Torsion Angles for **4a**

| <b>A</b> | <b>B</b> | <b>C</b> | <b>D</b> | <b>Angle/°</b> | <b>A</b> | <b>B</b> | <b>C</b> | <b>D</b> | <b>Angle/°</b> |
|----------|----------|----------|----------|----------------|----------|----------|----------|----------|----------------|
| O2       | C4       | C5       | C2       | -166.0(3)      | C10      | C1       | C11      | C12      | 116.6(3)       |
| O2       | C4       | C5       | C6       | 76.4(4)        | C10      | C1       | C19      | C18      | -121.6(3)      |
| O4       | C9       | C10      | C1       | 63.6(4)        | C10      | C1       | C19      | C20      | 59.3(3)        |
| O4       | C9       | C10      | C7       | -177.7(3)      | C10      | C7       | C8       | O3       | 179.9(3)       |
| O5       | C11      | C12      | C13      | 7.4(4)         | C10      | C7       | C8       | N2       | 1.4(3)         |
| O5       | C11      | C12      | C17      | -172.2(3)      | C11      | C1       | C2       | C3       | 74.3(3)        |
| O6       | C18      | C19      | C1       | -178.8(3)      | C11      | C1       | C2       | C5       | -170.3(2)      |
| O6       | C18      | C19      | C20      | 0.3(5)         | C11      | C1       | C10      | C7       | -178.2(2)      |
| N1       | C4       | C5       | C2       | 13.1(3)        | C11      | C1       | C10      | C9       | -63.2(3)       |
| N1       | C4       | C5       | C6       | -104.6(2)      | C11      | C1       | C19      | C18      | 1.1(4)         |
| N1       | C28      | C29      | C30      | -176.8(3)      | C11      | C1       | C19      | C20      | -178.1(2)      |
| N1       | C28      | C33      | C32      | 175.8(3)       | C11      | C12      | C13      | C14      | -178.5(3)      |
| N2       | C9       | C10      | C1       | -115.3(2)      | C11      | C12      | C17      | C16      | 178.0(3)       |
| N2       | C9       | C10      | C7       | 3.4(3)         | C11      | C12      | C17      | C18      | -0.8(4)        |
| N2       | C34      | C35      | C36      | -179.6(3)      | C12      | C13      | C14      | C15      | -0.5(5)        |
| N2       | C34      | C39      | C38      | 180.0(3)       | C12      | C17      | C18      | O6       | 178.2(3)       |
| N3       | C6       | C7       | C8       | 58.3(3)        | C12      | C17      | C18      | C19      | -5.1(4)        |
| N3       | C6       | C7       | C10      | 175.4(2)       | C13      | C12      | C17      | C16      | -1.6(4)        |
| N3       | C6       | C20      | C19      | -178.2(2)      | C13      | C12      | C17      | C18      | 179.6(3)       |
| N3       | C6       | C20      | C21      | 3.4(3)         | C13      | C14      | C15      | C16      | 0.4(5)         |
| C1       | C2       | C3       | O1       | -52.7(4)       | C14      | C15      | C16      | C17      | -0.9(5)        |
| C1       | C2       | C3       | N1       | 125.1(2)       | C15      | C16      | C17      | C12      | 1.5(5)         |
| C1       | C2       | C5       | C4       | -129.6(2)      | C15      | C16      | C17      | C18      | -179.7(3)      |
| C1       | C2       | C5       | C6       | -9.6(3)        | C16      | C17      | C18      | O6       | -0.6(5)        |
| C1       | C11      | C12      | C13      | -173.5(2)      | C16      | C17      | C18      | C19      | 176.1(3)       |

|    |     |     |     |           |     |     |     |     |           |
|----|-----|-----|-----|-----------|-----|-----|-----|-----|-----------|
| C1 | C11 | C12 | C17 | 6.8(4)    | C17 | C12 | C13 | C14 | 1.1(4)    |
| C1 | C19 | C20 | C6  | -5.6(3)   | C17 | C18 | C19 | C1  | 4.7(4)    |
| C1 | C19 | C20 | C21 | 172.0(3)  | C17 | C18 | C19 | C20 | -176.2(3) |
| C2 | C1  | C10 | C7  | 64.9(3)   | C18 | C19 | C20 | C6  | 175.3(3)  |
| C2 | C1  | C10 | C9  | 179.9(2)  | C18 | C19 | C20 | C21 | -7.1(5)   |
| C2 | C1  | C11 | O5  | 49.6(3)   | C19 | C1  | C2  | C3  | -53.4(3)  |
| C2 | C1  | C11 | C12 | -129.6(3) | C19 | C1  | C2  | C5  | 62.0(3)   |
| C2 | C1  | C19 | C18 | 124.7(3)  | C19 | C1  | C10 | C7  | -50.6(3)  |
| C2 | C1  | C19 | C20 | -54.4(3)  | C19 | C1  | C10 | C9  | 64.4(3)   |
| C2 | C5  | C6  | N3  | -164.0(2) | C19 | C1  | C11 | O5  | 172.3(3)  |
| C2 | C5  | C6  | C7  | 68.8(2)   | C19 | C1  | C11 | C12 | -6.8(4)   |
| C2 | C5  | C6  | C20 | -48.1(3)  | C19 | C20 | C21 | C22 | -1.4(6)   |
| C3 | N1  | C4  | O2  | 169.1(3)  | C19 | C20 | C21 | C26 | -178.7(3) |
| C3 | N1  | C4  | C5  | -9.9(3)   | C20 | C6  | C7  | C8  | -58.1(3)  |
| C3 | N1  | C28 | C29 | -42.7(4)  | C20 | C6  | C7  | C10 | 59.1(3)   |
| C3 | N1  | C28 | C33 | 139.9(3)  | C20 | C21 | C22 | C23 | -177.6(3) |
| C3 | C2  | C5  | C4  | -11.3(3)  | C20 | C21 | C26 | N3  | -2.1(3)   |
| C3 | C2  | C5  | C6  | 108.7(2)  | C20 | C21 | C26 | C25 | 177.7(2)  |
| C4 | N1  | C3  | O1  | -179.8(3) | C21 | C22 | C23 | C24 | 0.0(5)    |
| C4 | N1  | C3  | C2  | 2.3(3)    | C22 | C21 | C26 | N3  | -179.9(3) |
| C4 | N1  | C28 | C29 | 133.3(3)  | C22 | C21 | C26 | C25 | -0.1(4)   |
| C4 | N1  | C28 | C33 | -44.2(4)  | C22 | C23 | C24 | C25 | 1.2(6)    |
| C4 | C5  | C6  | N3  | -48.9(3)  | C23 | C24 | C25 | C26 | -1.8(5)   |
| C4 | C5  | C6  | C7  | -176.1(2) | C24 | C25 | C26 | N3  | -179.0(3) |
| C4 | C5  | C6  | C20 | 67.0(3)   | C24 | C25 | C26 | C21 | 1.2(4)    |
| C5 | C2  | C3  | O1  | -171.8(3) | C26 | N3  | C6  | C5  | 114.4(3)  |
| C5 | C2  | C3  | N1  | 6.0(3)    | C26 | N3  | C6  | C7  | -123.9(3) |

|     |     |     |     |           |     |     |     |     |           |
|-----|-----|-----|-----|-----------|-----|-----|-----|-----|-----------|
| C5  | C6  | C7  | C8  | -175.3(2) | C26 | N3  | C6  | C20 | -4.8(3)   |
| C5  | C6  | C7  | C10 | -58.2(3)  | C26 | C21 | C22 | C23 | -0.5(4)   |
| C5  | C6  | C20 | C19 | 59.7(3)   | C27 | N3  | C6  | C5  | -61.7(3)  |
| C5  | C6  | C20 | C21 | -118.7(2) | C27 | N3  | C6  | C7  | 60.0(4)   |
| C6  | N3  | C26 | C21 | 4.5(3)    | C27 | N3  | C6  | C20 | 179.2(3)  |
| C6  | N3  | C26 | C25 | -175.3(3) | C27 | N3  | C26 | C21 | -179.5(3) |
| C6  | C7  | C8  | O3  | -60.8(4)  | C27 | N3  | C26 | C25 | 0.7(5)    |
| C6  | C7  | C8  | N2  | 120.6(2)  | C28 | N1  | C3  | O1  | -3.5(5)   |
| C6  | C7  | C10 | C1  | -7.1(3)   | C28 | N1  | C3  | C2  | 178.7(3)  |
| C6  | C7  | C10 | C9  | -125.5(2) | C28 | N1  | C4  | O2  | -7.3(4)   |
| C6  | C20 | C21 | C22 | 176.4(3)  | C28 | N1  | C4  | C5  | 173.6(2)  |
| C6  | C20 | C21 | C26 | -1.0(3)   | C28 | C29 | C30 | C31 | 1.1(6)    |
| C7  | C6  | C20 | C19 | -54.8(3)  | C29 | C28 | C33 | C32 | -1.7(5)   |
| C7  | C6  | C20 | C21 | 126.8(2)  | C29 | C30 | C31 | C32 | -1.8(7)   |
| C8  | N2  | C9  | O4  | 178.3(3)  | C30 | C31 | C32 | C33 | 0.7(7)    |
| C8  | N2  | C9  | C10 | -2.7(3)   | C31 | C32 | C33 | C28 | 1.0(6)    |
| C8  | N2  | C34 | C35 | -114.7(3) | C33 | C28 | C29 | C30 | 0.6(5)    |
| C8  | N2  | C34 | C39 | 65.9(4)   | C34 | N2  | C8  | O3  | 2.2(4)    |
| C8  | C7  | C10 | C1  | 115.7(2)  | C34 | N2  | C8  | C7  | -179.2(2) |
| C8  | C7  | C10 | C9  | -2.8(3)   | C34 | N2  | C9  | O4  | -1.7(5)   |
| C9  | N2  | C8  | O3  | -177.8(3) | C34 | N2  | C9  | C10 | 177.3(2)  |
| C9  | N2  | C8  | C7  | 0.8(3)    | C34 | C35 | C36 | C37 | -0.1(5)   |
| C9  | N2  | C34 | C35 | 65.3(4)   | C35 | C34 | C39 | C38 | 0.7(5)    |
| C9  | N2  | C34 | C39 | -114.1(3) | C35 | C36 | C37 | C38 | 0.1(6)    |
| C10 | C1  | C2  | C3  | -169.9(2) | C36 | C37 | C38 | C39 | 0.3(7)    |
| C10 | C1  | C2  | C5  | -54.5(3)  | C37 | C38 | C39 | C34 | -0.7(6)   |
| C10 | C1  | C11 | O5  | -64.3(3)  | C39 | C34 | C35 | C36 | -0.3(5)   |

**Table S11** Hydrogen Atom Coordinates ( $\text{\AA}\times 10^4$ ) and Isotropic Displacement Parameters ( $\text{\AA}^2\times 10^3$ ) for **4a**

| Atom | <i>x</i> | <i>y</i> | <i>z</i> | U(eq) |
|------|----------|----------|----------|-------|
| H2   | 5727     | 7272     | 179      | 41    |
| H5   | 3620     | 7218     | -171     | 42    |
| H7   | 2280     | 9051     | -38      | 40    |
| H10  | 4351     | 9316     | 99       | 39    |
| H13  | 8592     | 8705     | 1864     | 58    |
| H14  | 9511     | 8458     | 3299     | 74    |
| H15  | 8495     | 7613     | 4627     | 77    |
| H16  | 6545     | 6969     | 4532     | 70    |
| H22  | 2901     | 5719     | 3970     | 58    |
| H23  | 1116     | 4834     | 4449     | 75    |
| H24  | -562     | 4982     | 3395     | 74    |
| H25  | -492     | 5940     | 1835     | 59    |
| H27A | 819      | 7916     | -252     | 79    |
| H27B | -381     | 7610     | 386      | 79    |
| H27C | 689      | 6608     | 128      | 79    |
| H29  | 7689     | 3433     | 1461     | 73    |
| H30  | 8272     | 1390     | 2164     | 102   |
| H31  | 6638     | 460      | 2860     | 125   |
| H32  | 4413     | 1532     | 2949     | 111   |
| H33  | 3831     | 3590     | 2286     | 80    |
| H35  | 2035     | 12395    | 939      | 69    |
| H36  | 1127     | 13654    | 1760     | 96    |
| H37  | 371      | 12934    | 3204     | 118   |
| H38  | 509      | 10930    | 3858     | 111   |
| H39  | 1433     | 9648     | 3061     | 79    |

|      |      |      |      |     |
|------|------|------|------|-----|
| H40A | 3563 | 8479 | 4515 | 284 |
| H40B | 3955 | 8015 | 5585 | 284 |
| H40C | 2666 | 9098 | 5158 | 284 |
| H42A | 3105 | 6225 | 6470 | 247 |
| H42B | 3971 | 6102 | 5622 | 247 |
| H42C | 2551 | 5772 | 5748 | 247 |

---

## 4 Reference

- [1] Y. Hong, J. Chen, Z. Zhang, Y. Liu, W. Zhang, *Org. Lett.*, 2016, **18**, 2640.
- [2] D. Xia, X. Guo, L. Chen, M. Baumgarten, A. Keerthi, K. Müllen, *Angew. Chem. Int. Ed.*, 2016, **55**, 941.
- [3] M. Delor, J. Dai, T. D. Roberts, J. R. Rogers, S. M. Hamed, J. B. Neaton, P. L. Geissler, M. B. Francis, N. S. Ginsberg, *J. Am. Chem. Soc.*, 2018, **140**, 6278.
- [4] R. Mandal, B. Emayavaramban, B. Sundararaju, *Org. Lett.*, 2018, **20**, 2835.
- [5] M. Fischer, J. Georges, *Chem. Phys. Lett.*, 1996, **260**, 115.
- [6] J. N. Demas, G. A. Crosby, *J. Phys. Chem.*, 1971, **75**, 991.

## 5 NMR spectra of products

5-methyl-7,17-diphenyl-5b,8a-dihydro-5*H*,6*H*-5a,8b-[3,4]epipyrrolonaphtho[2,3-*c*]pyrrolo[3,4-*a*]carbazole-6,8,9,14,16,18(7*H*)-hexaone (**4a**)

$^1\text{H}$  NMR (400 MHz)

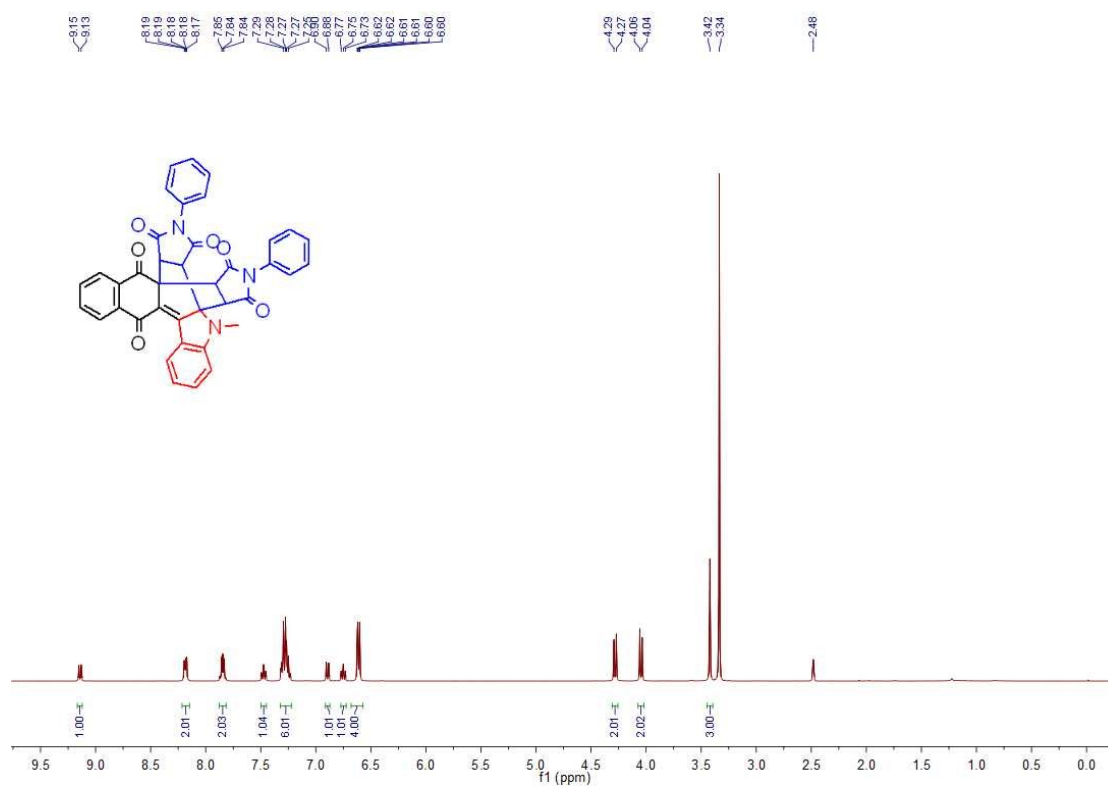

$^{13}\text{C}$  NMR (101 MHz)



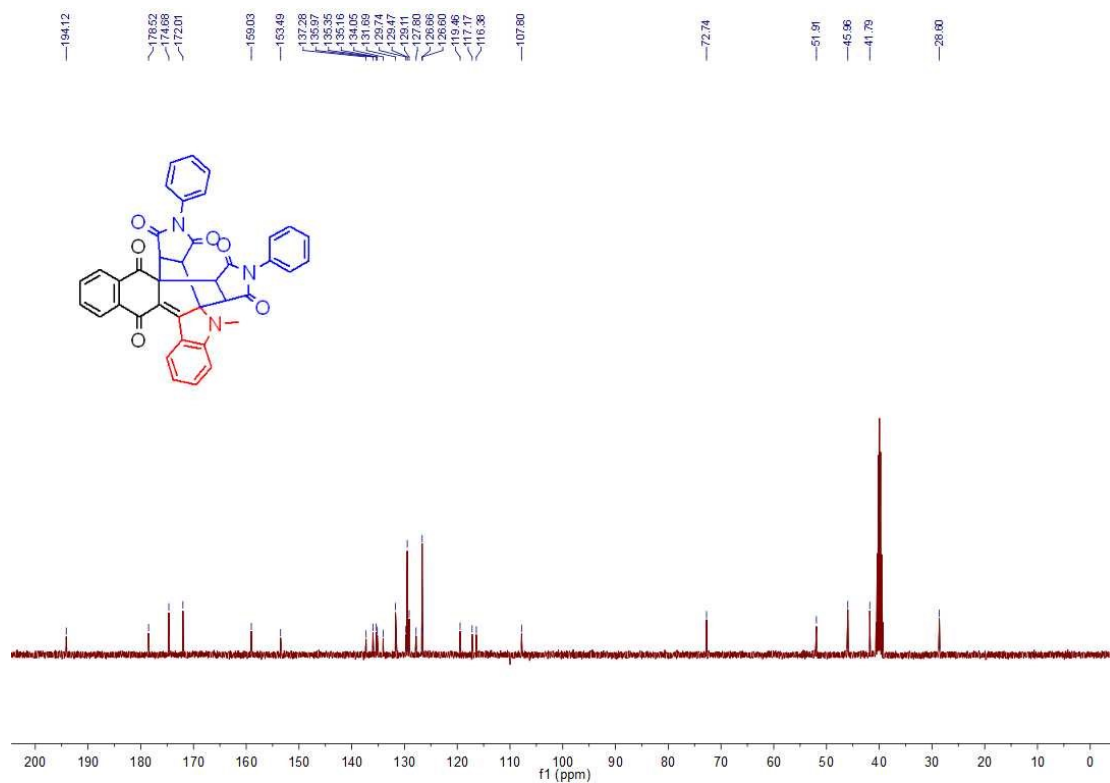

7,17-diphenyl-5b,8a-dihydro-5H,6H-5a,8b-[3,4]epipyrrolonaphtho[2,3-c]pyrrolo[3,4-a]carbazole-6,8,9,14,16,18(7H)-hexaone (**4b**)

$^{13}\text{C}$  NMR (400 MHz)

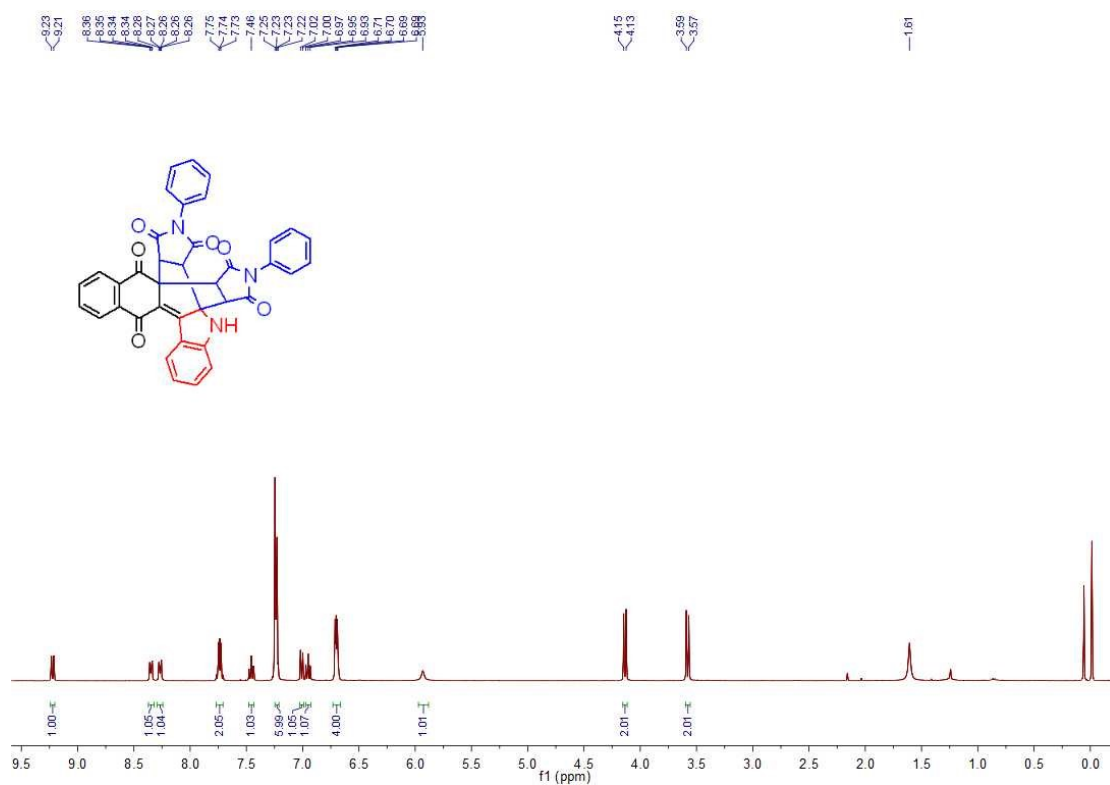

**<sup>13</sup>C NMR (101 MHz)**

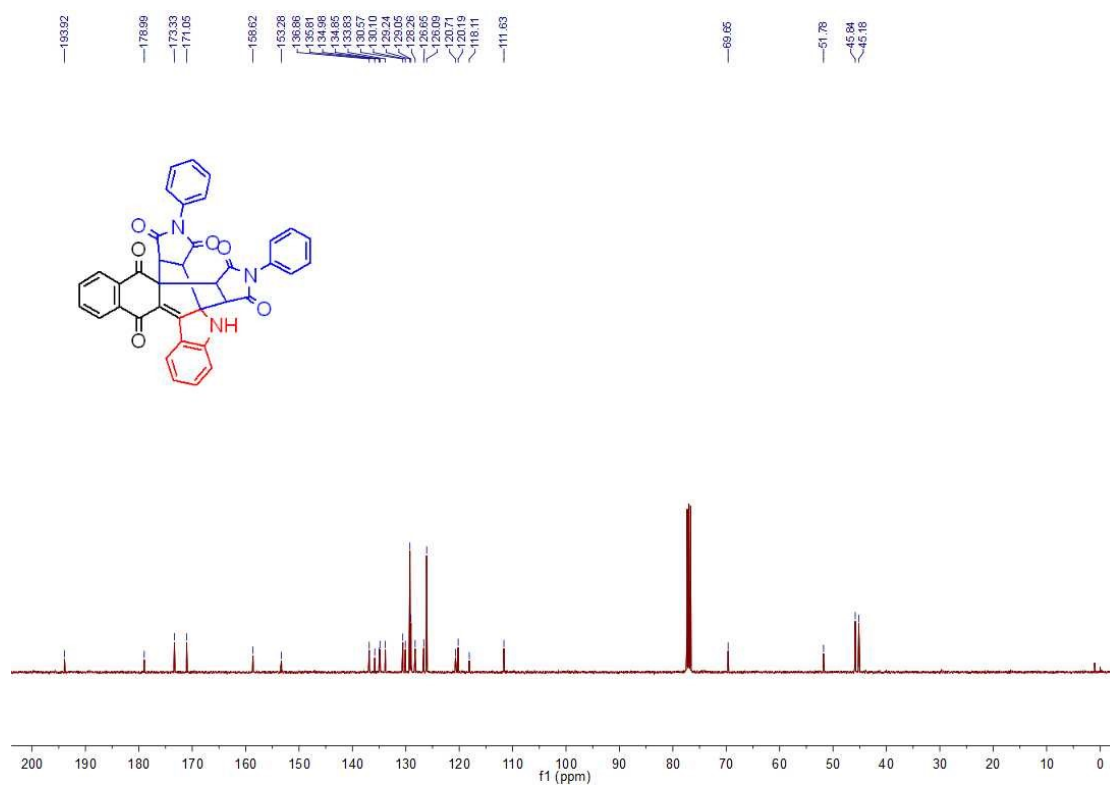

5-benzyl-7,17-diphenyl-5b,8a-dihydro-5H,6H-5a,8b-[3,4]epipyrrolonaphtho[2,3-

c]pyrrolo[3,4-a]carbazole-6,8,9,14,16,18(7H)-hexaone (**4c**)

<sup>1</sup>H NMR (400 MHz)

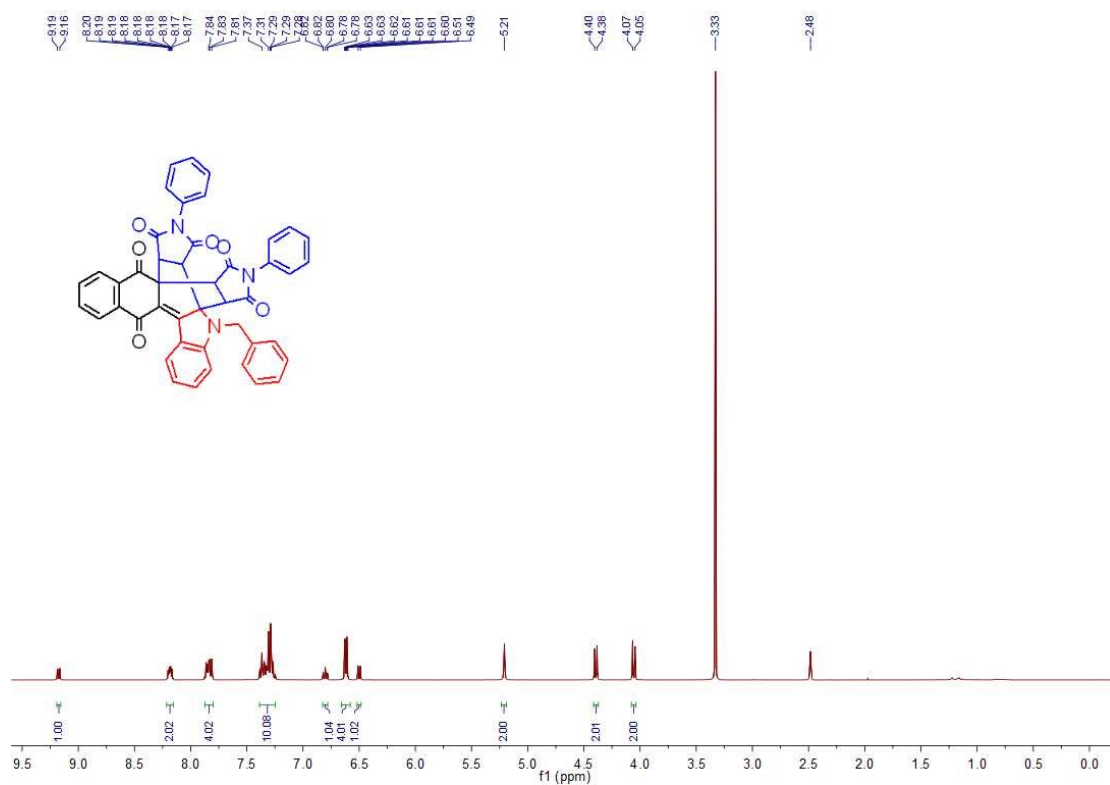

<sup>13</sup>C NMR (101 MHz)

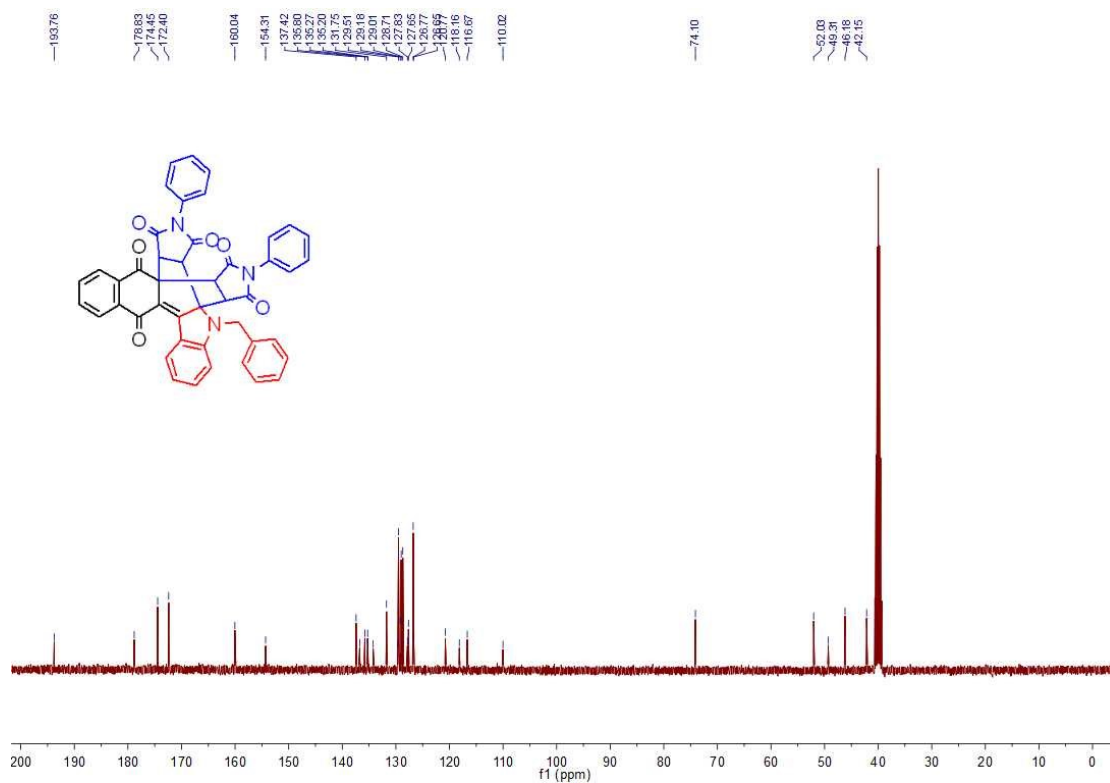

5-butyl-7,17-diphenyl-5b,8a-dihydro-5H,6H-5a,8b-[3,4]epipyrrolonaphtho[2,3-c]pyrrolo[3,4-a]carbazole-6,8,9,14,16,18(7H)-hexaone (**4d**)

$^{13}\text{C}$  NMR (400 MHz)

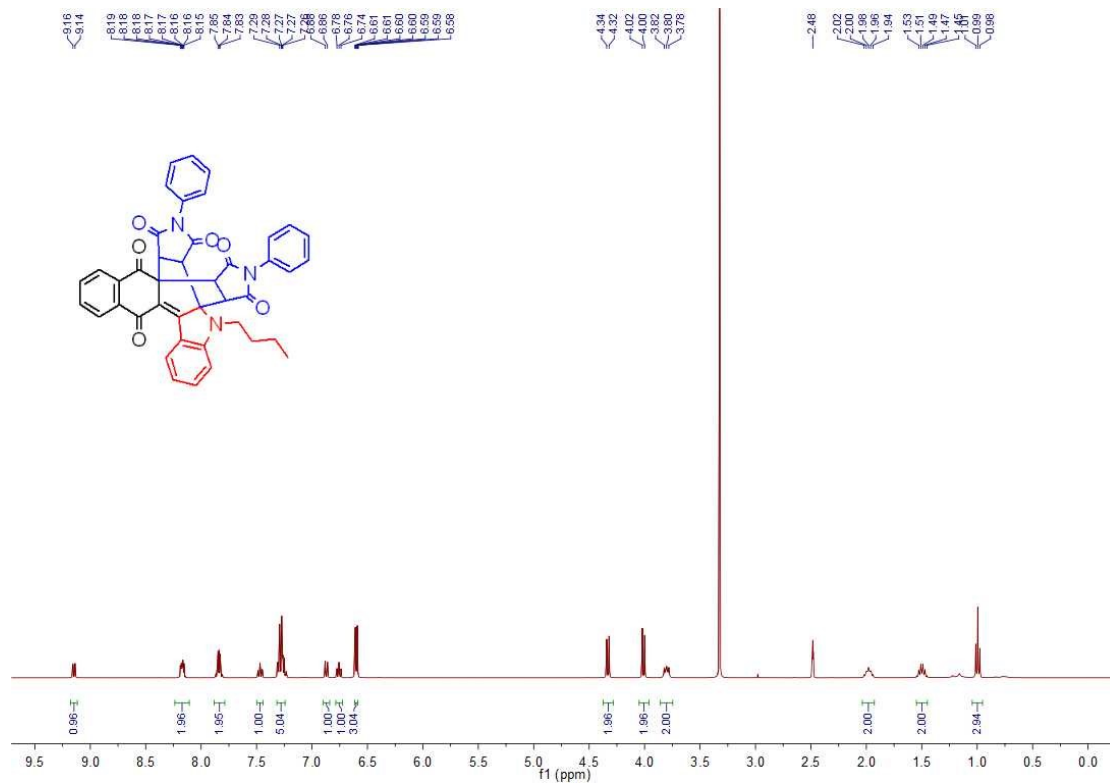

**<sup>13</sup>C NMR (101 MHz)**

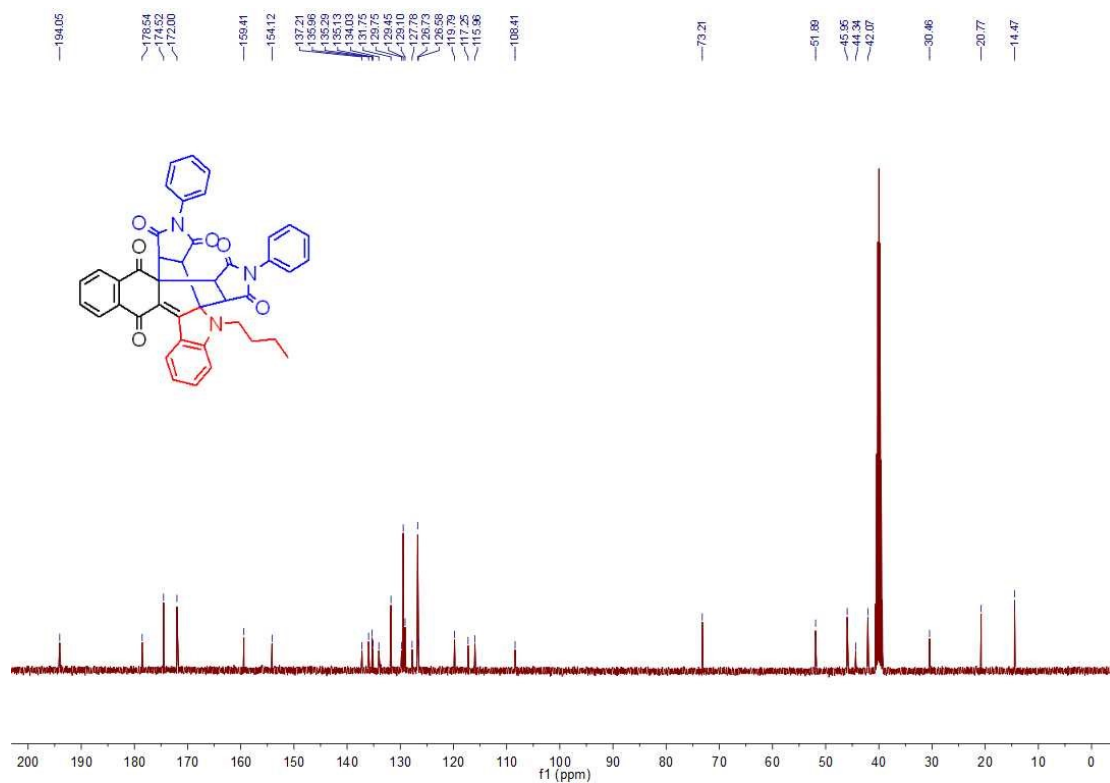

5-allyl-7,17-diphenyl-5b,8a-dihydro-5H,6H-5a,8b-[3,4]epipyrrolonaphtho[2,3-

c]pyrrolo[3,4-a]carbazole-6,8,9,14,16,18(7H)-hexaone (**4f**)

<sup>1</sup>H NMR (101 MHz)

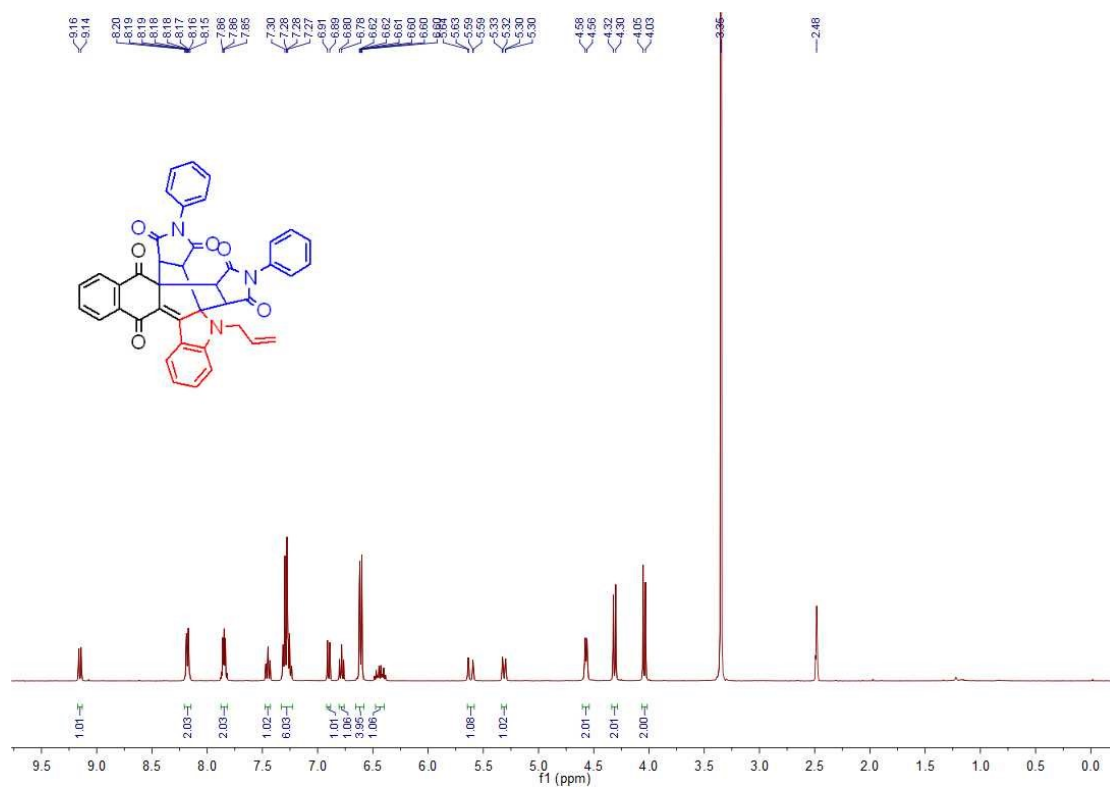

<sup>13</sup>C NMR (400 MHz)

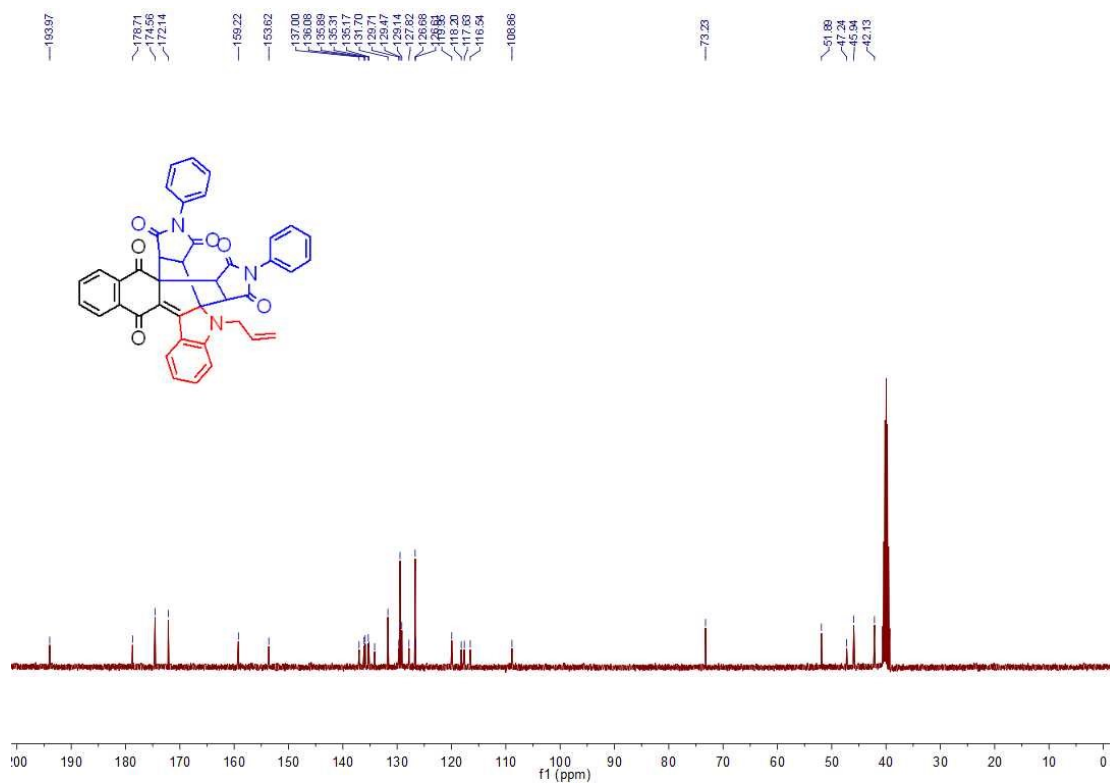

2-methoxy-5-methyl-7,17-diphenyl-5b,8a-dihydro-5H,6H-5a,8b-  
 [3,4]epipyrrolonaphtho[2,3-c]pyrrolo[3,4-a]carbazole-6,8,9,14,16,18(7H)-hexaone  
 (4g)

<sup>1</sup>H NMR (400 MHz)

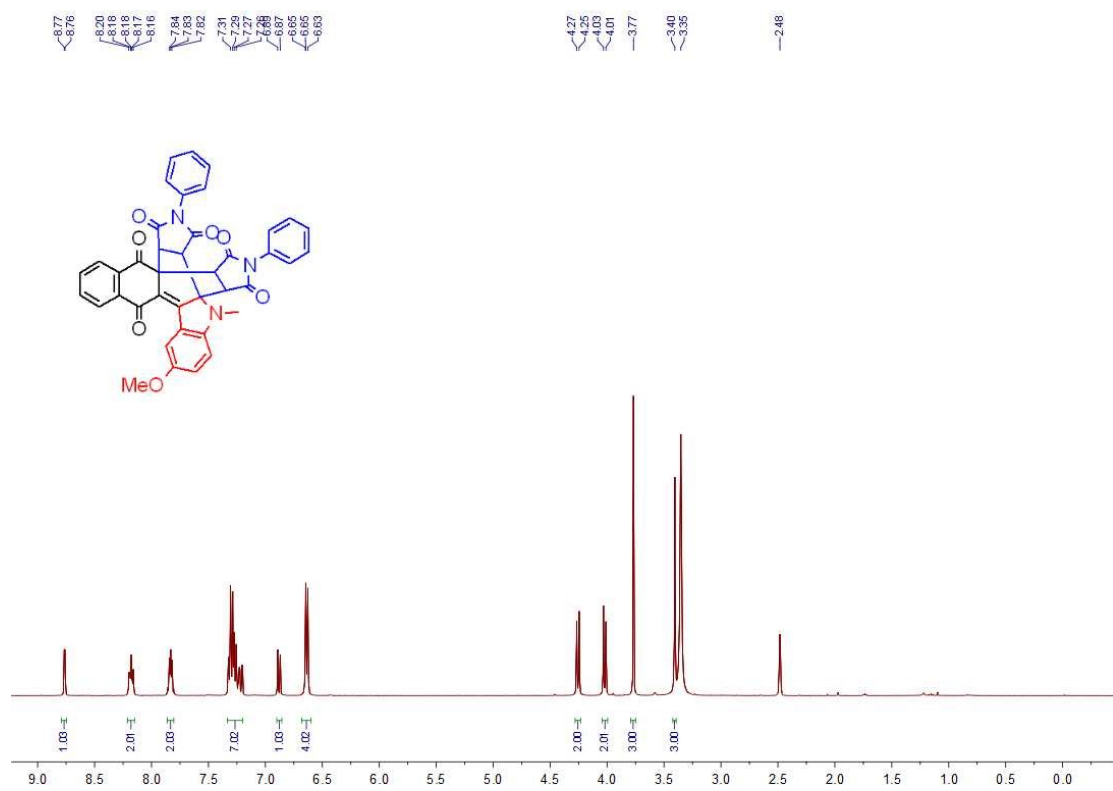

<sup>13</sup>C NMR (101 MHz)

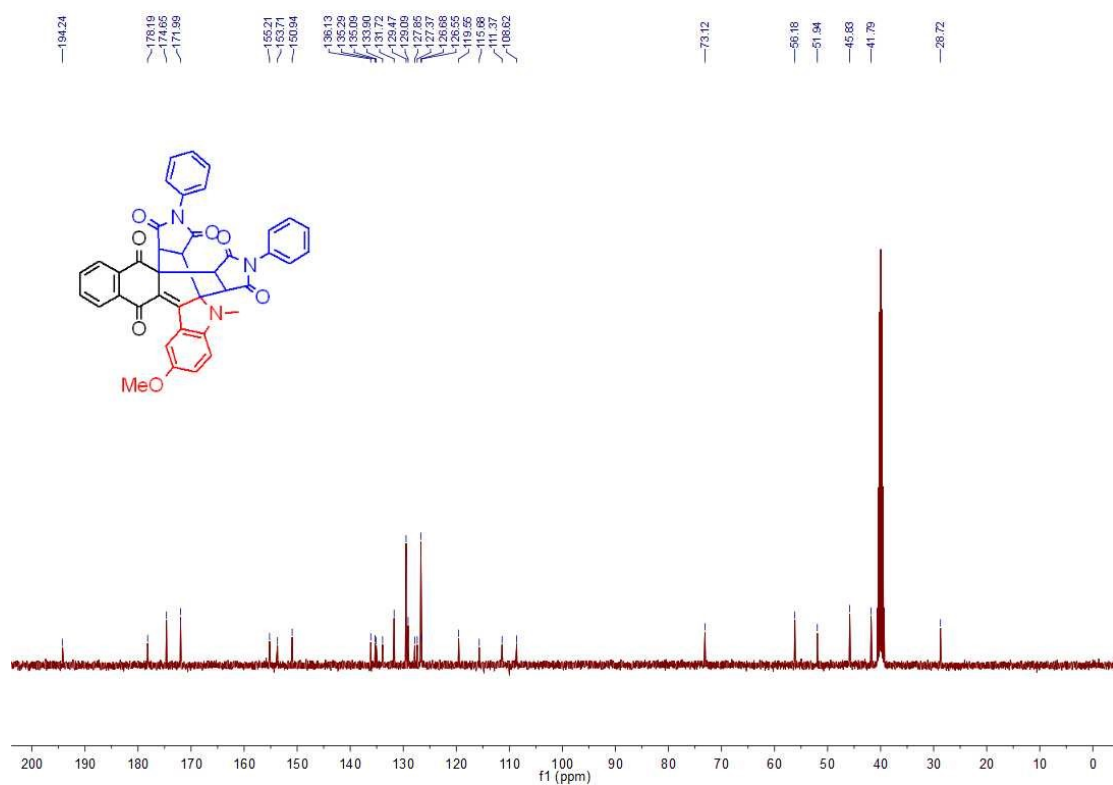

2-chloro-5-methyl-7,17-diphenyl-5b,8a-dihydro-5H,6H-5a,8b-



[3,4]epipyrrolonaphtho[2,3-c]pyrrolo[3,4-a]carbazole-6,8,9,14,16,18(7H)-hexaone

(4h)

$^1\text{H}$  NMR (400 MHz)

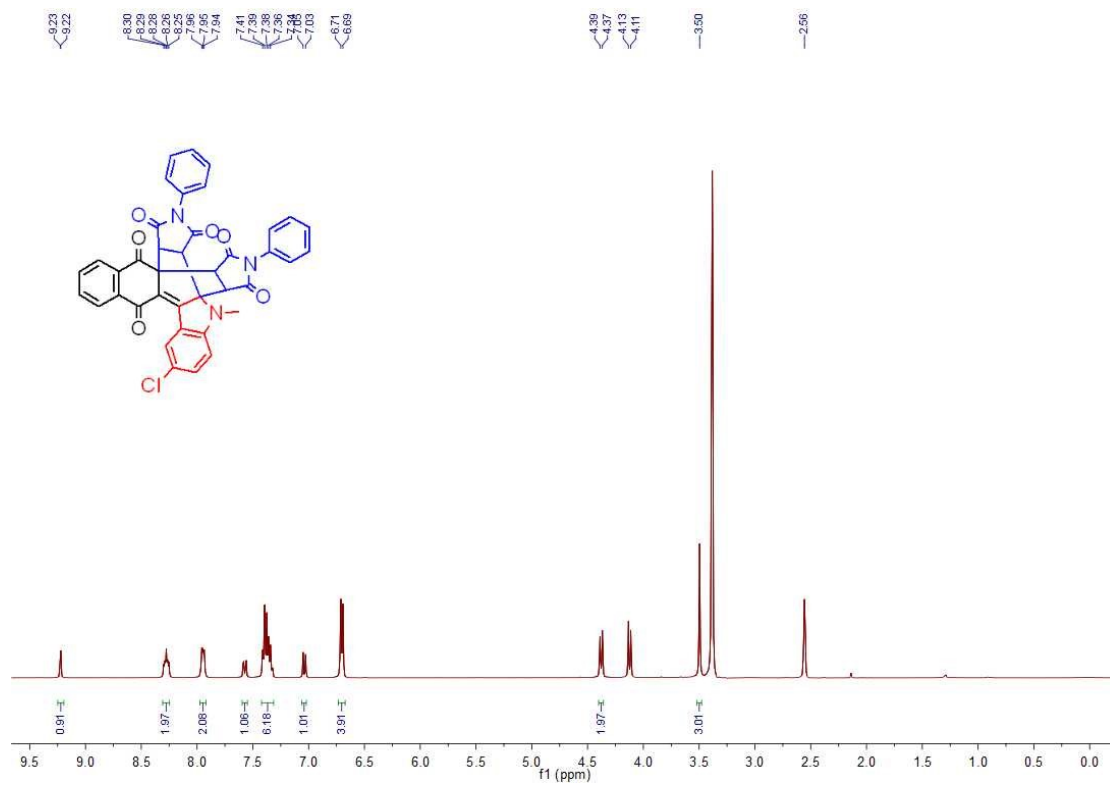

$^{13}\text{C}$  NMR (101 MHz)

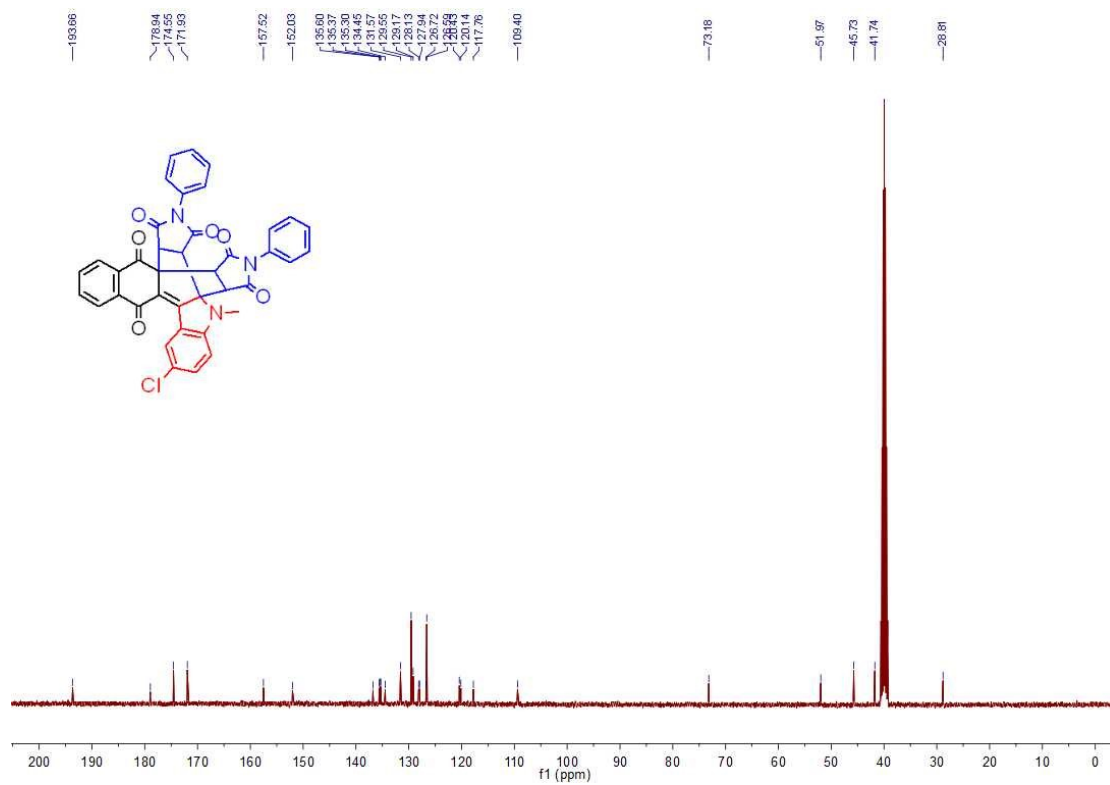

2-bromo-5-methyl-7,17-diphenyl-5b,8a-dihydro-5H,6H-5a,8b-  
[3,4]epipyrrolonaphtho[2,3-c]pyrrolo[3,4-a]carbazole-6,8,9,14,16,18(7H)-hexaone (**4i**)  
 $^{13}\text{C}$  NMR (101 MHz)

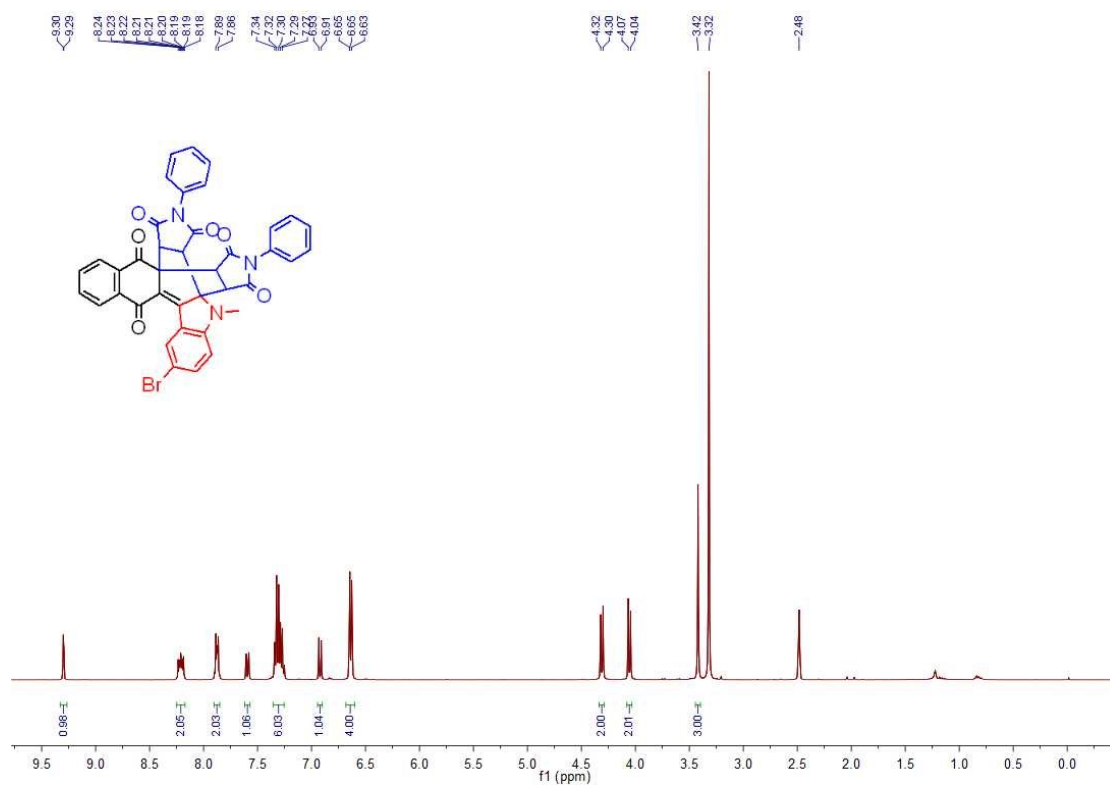

**<sup>13</sup>C NMR (101 MHz)**

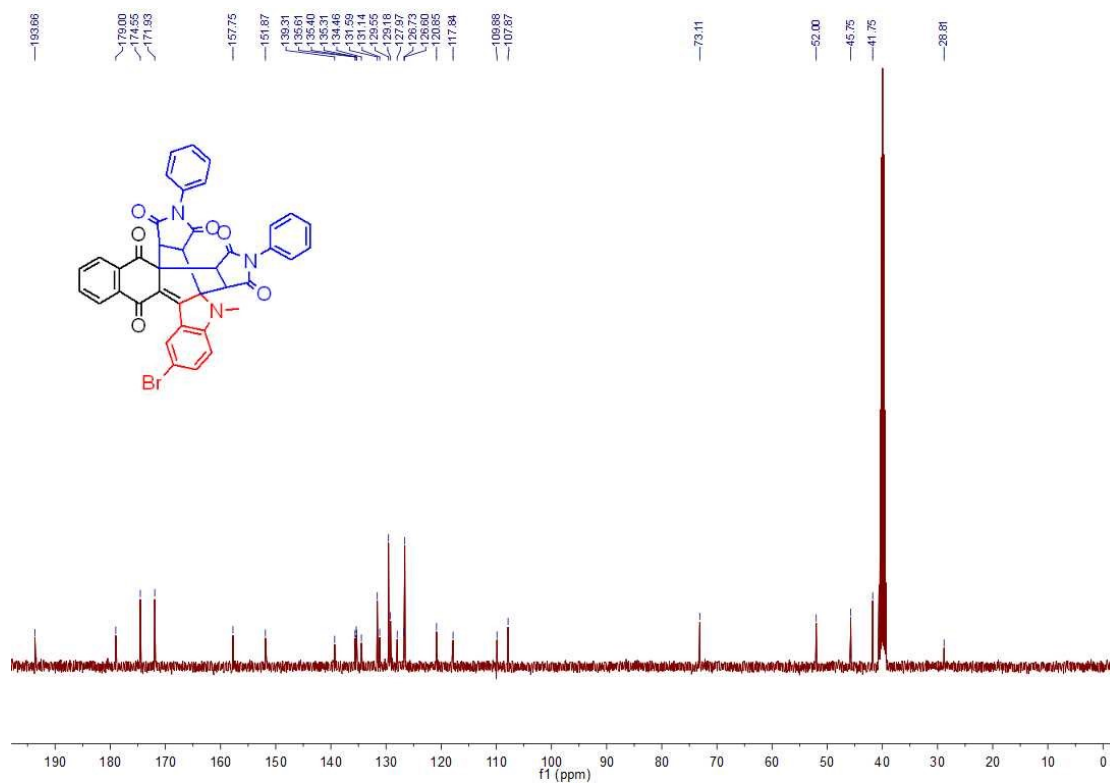

5-methyl-2-nitro-7,17-diphenyl-5b,8a-dihydro-5H,6H-5a,8b-

[3,4]epipyrrolonaphtho[2,3-c]pyrrolo[3,4-a]carbazole-6,8,9,14,16,18(7H)-hexaone (**4j**)

$^1\text{H}$  NMR (400 MHz)

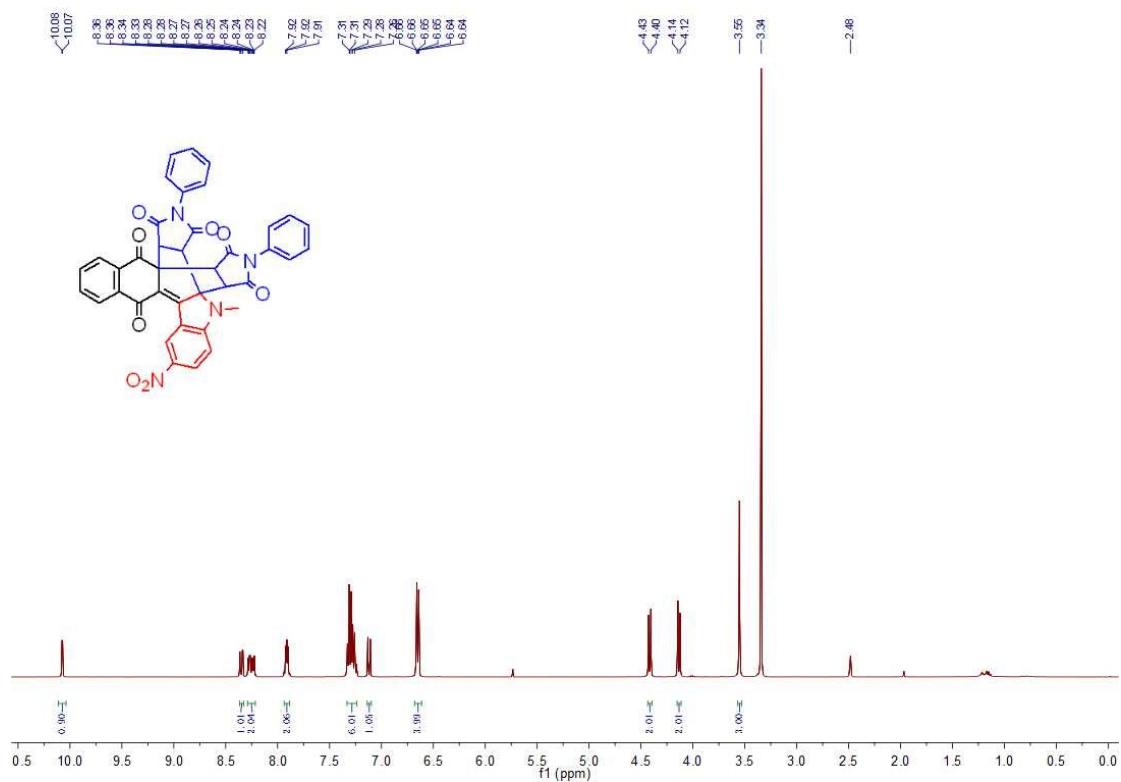

$^{13}\text{C}$  NMR (101 MHz)

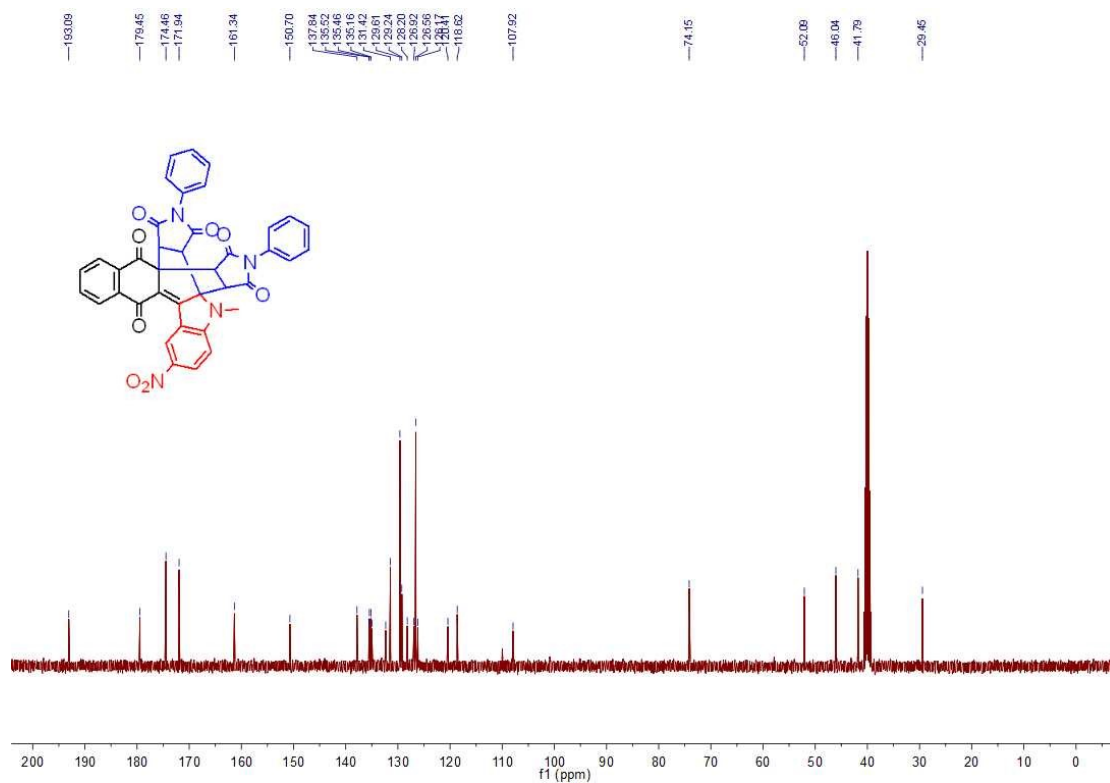

5-methyl-6,8,9,14,16,18-hexaoxo-7,17-diphenyl-5b,7,8,8a,9,14-hexahydro-5H,6H-5a,8b-[3,4]epipyrrolonaphtho[2,3-c]pyrrolo[3,4-a]carbazole-2-carbonitrile (**4k**)  
<sup>1</sup>H NMR (400 MHz)

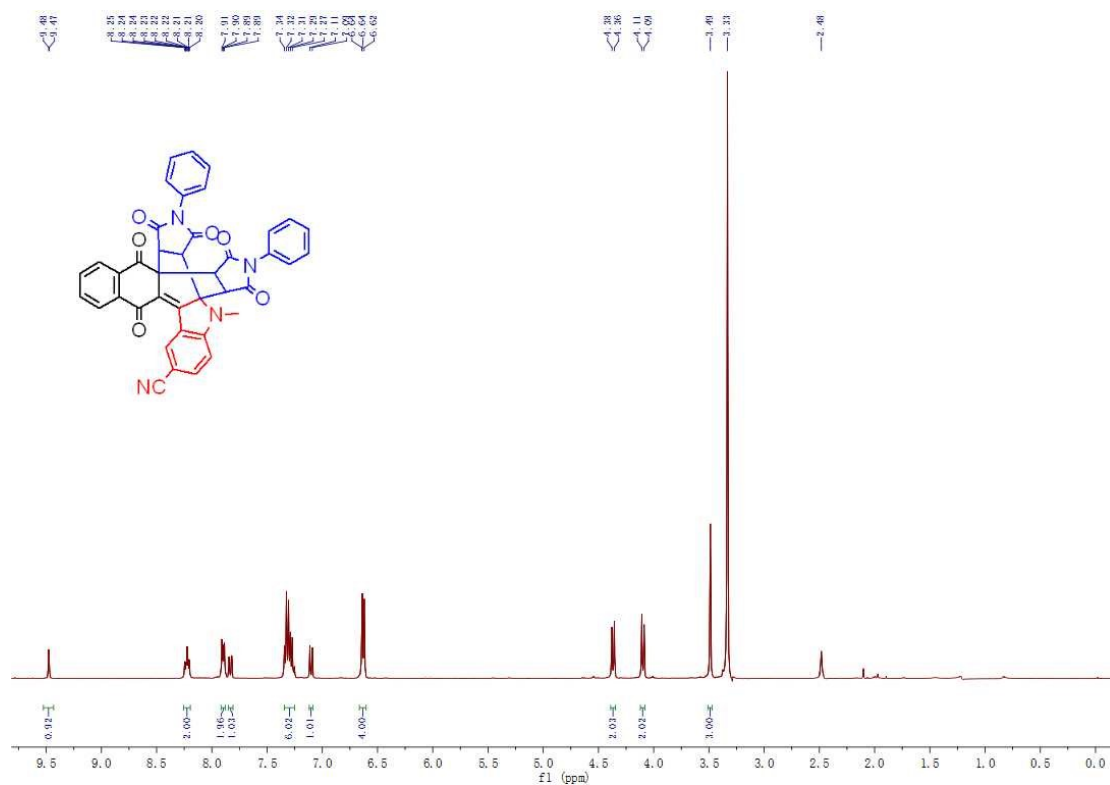

**<sup>13</sup>C NMR (101 MHz)**

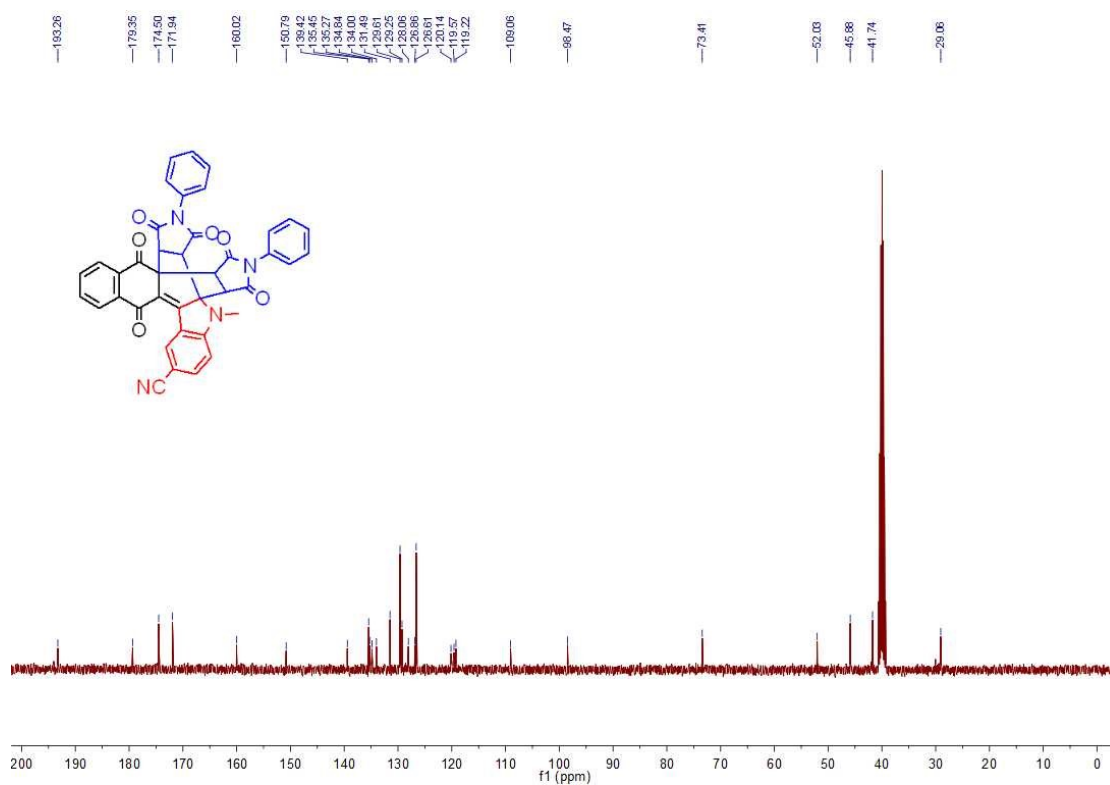

2,3-dichloro-5-methyl-7,17-diphenyl-5b,8a-dihydro-5H,6H-5a,8b-

[3,4]epipyrrolonaphtho[2,3-c]pyrrolo[3,4-a]carbazole-6,8,9,14,16,18(7H)-hexaone (**4I**)

$^1\text{H}$  NMR (400 MHz)

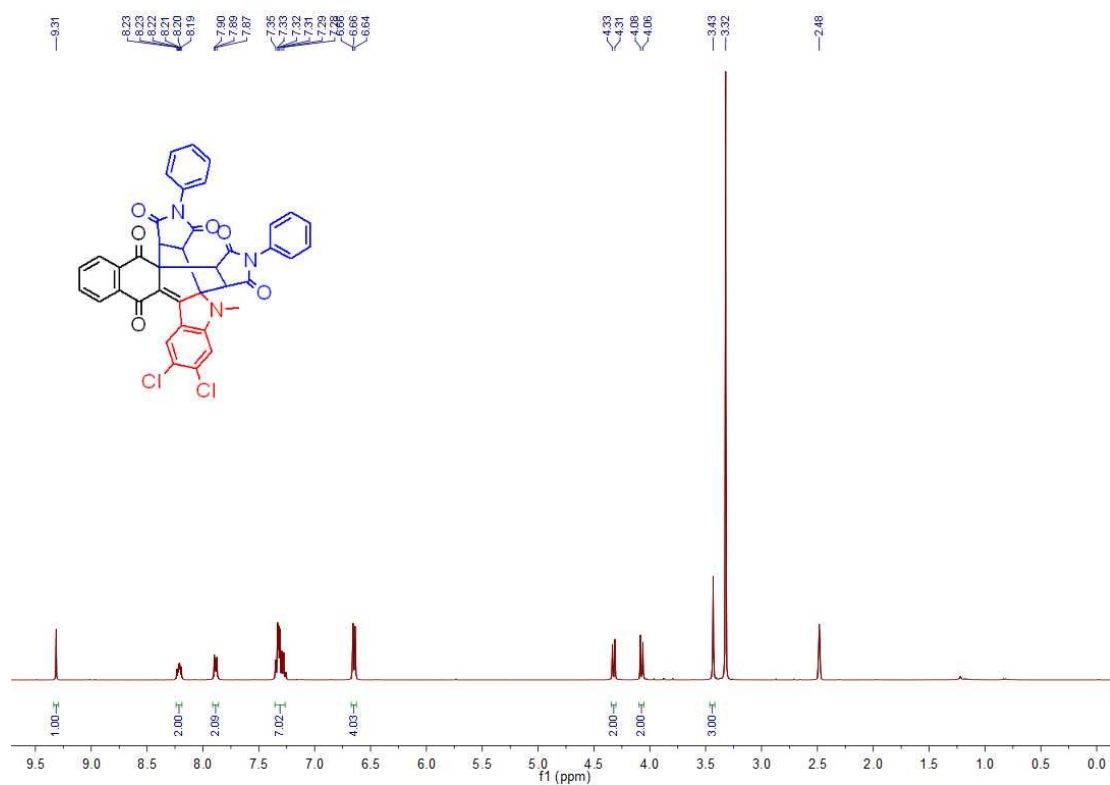

$^{13}\text{C}$  NMR (101 MHz)

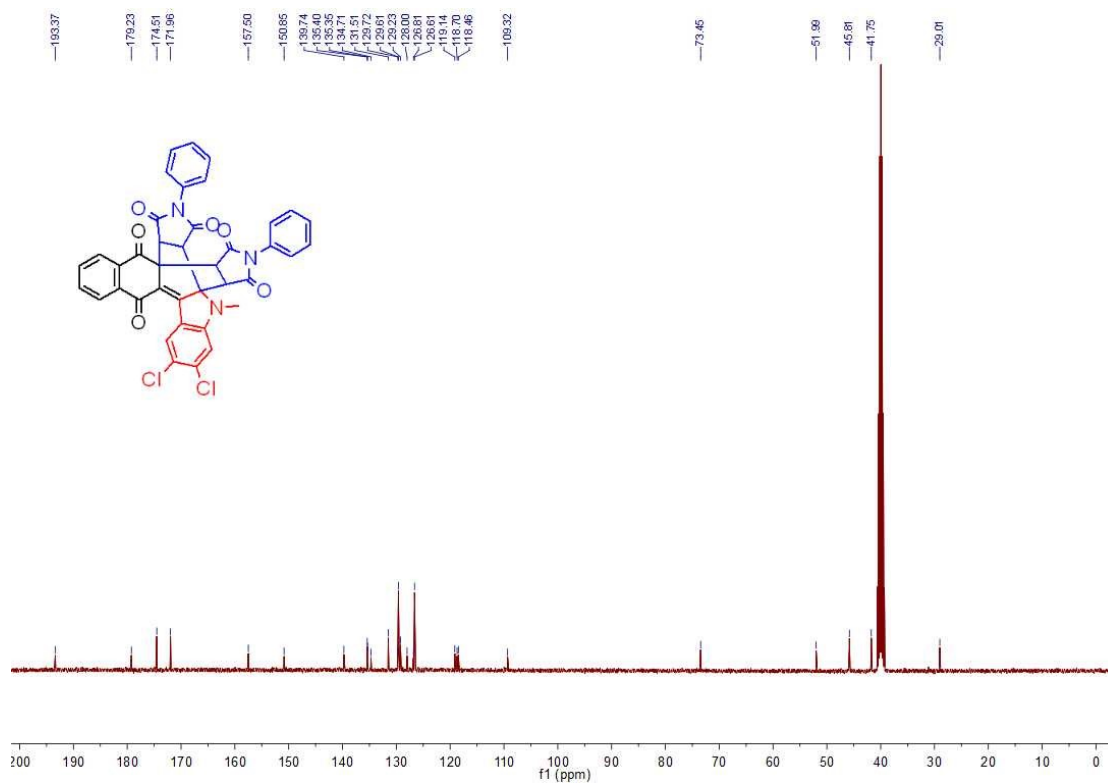

3-methoxy-5-methyl-7,17-diphenyl-5b,8a-dihydro-5H,6H-5a,8b-  
 [3,4]epipyrrolonaphtho[2,3-c]pyrrolo[3,4-a]carbazole-6,8,9,14,16,18(7H)-hexaone  
**(4m)**

<sup>1</sup>H NMR (400 MHz)



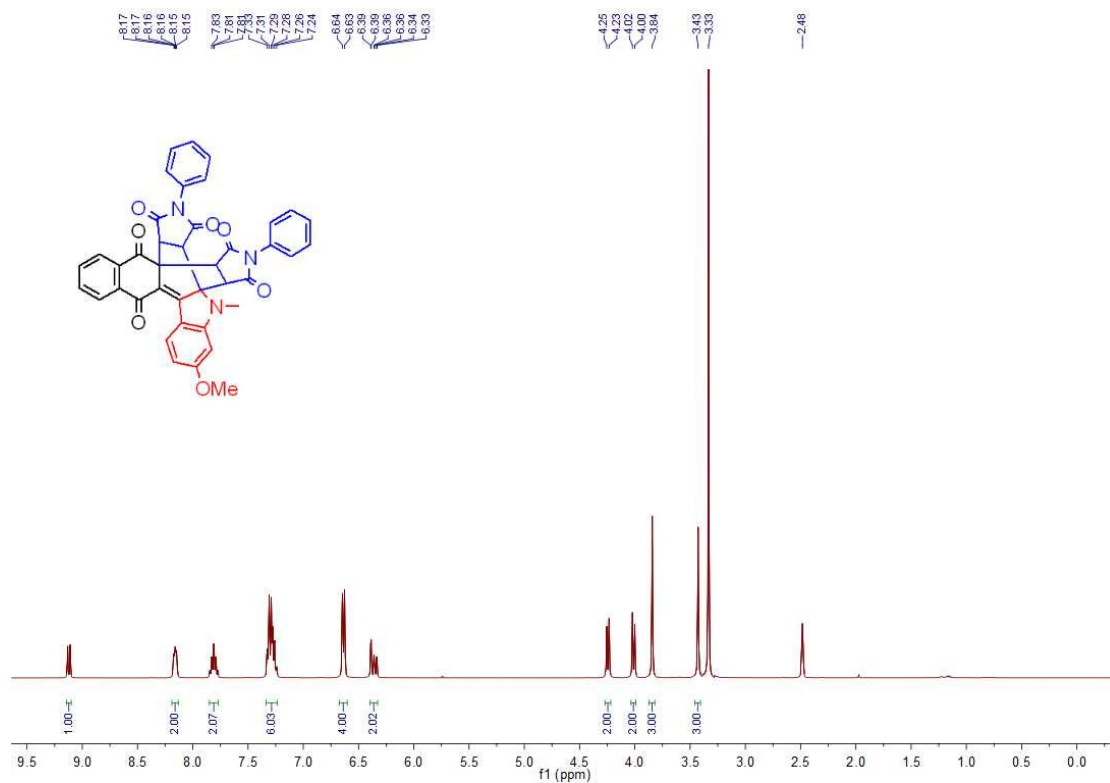

**<sup>13</sup>C NMR (101 MHz)**

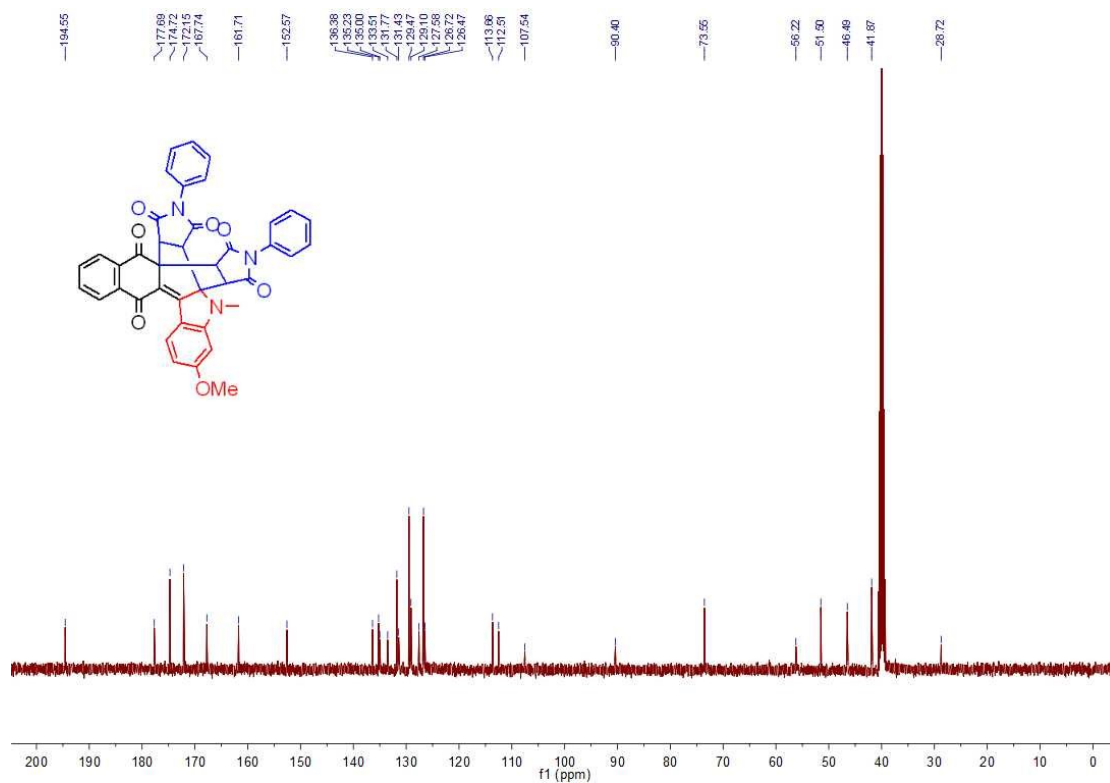

3-chloro-5-methyl-7,17-diphenyl-5b,8a-dihydro-5H,6H-5a,8b-

[3,4]epipyrrolonaphtho[2,3-c]pyrrolo[3,4-a]carbazole-6,8,9,14,16,18(7H)-hexaone

(4n)

<sup>1</sup>H NMR (400 MHz)

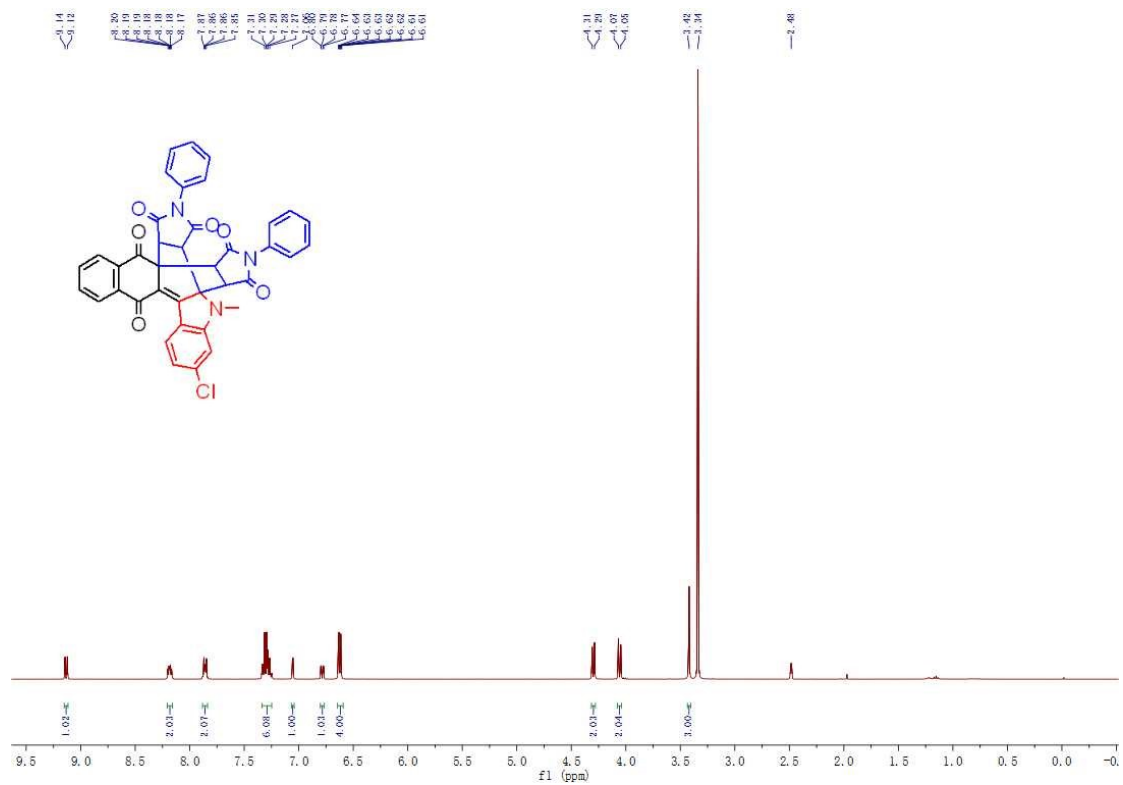

<sup>13</sup>C NMR (101 MHz)

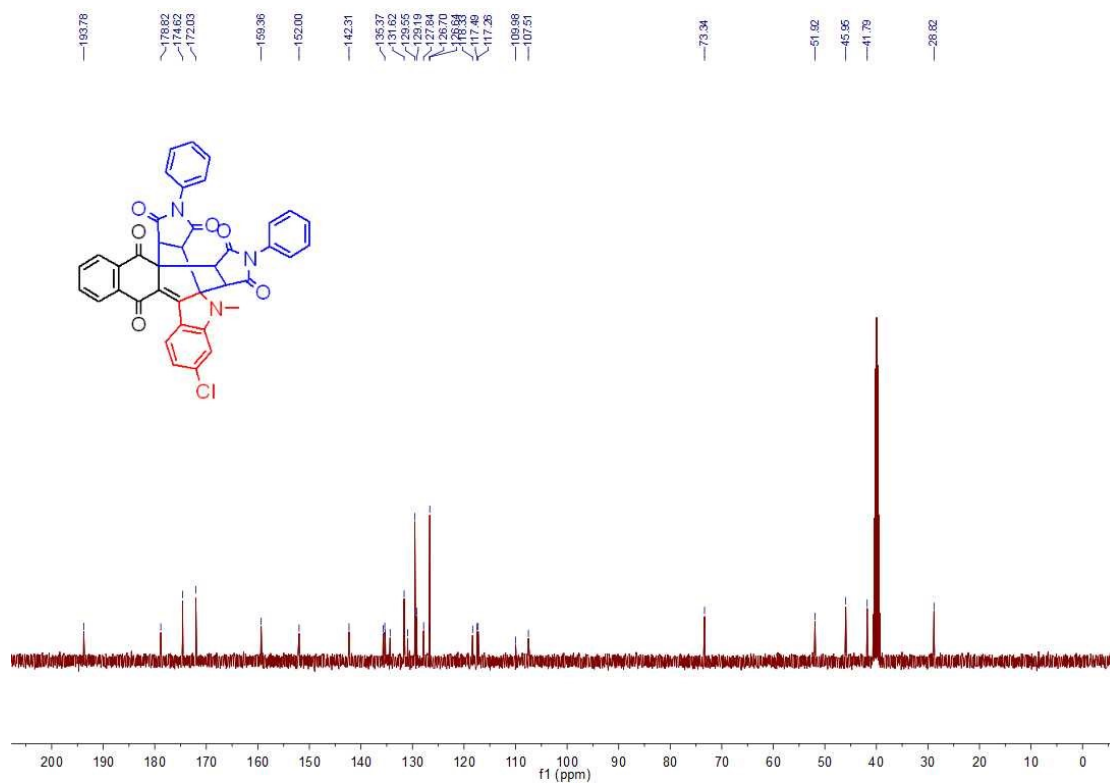

3-fluoro-5-methyl-7,17-diphenyl-5b,8a-dihydro-5H,6H-5a,8b-  
 [3,4]epipyrrolonaphtho[2,3-c]pyrrolo[3,4-a]carbazole-6,8,9,14,16,18(7H)-hexaone  
**(4o)**

<sup>1</sup>H NMR (400 MHz)

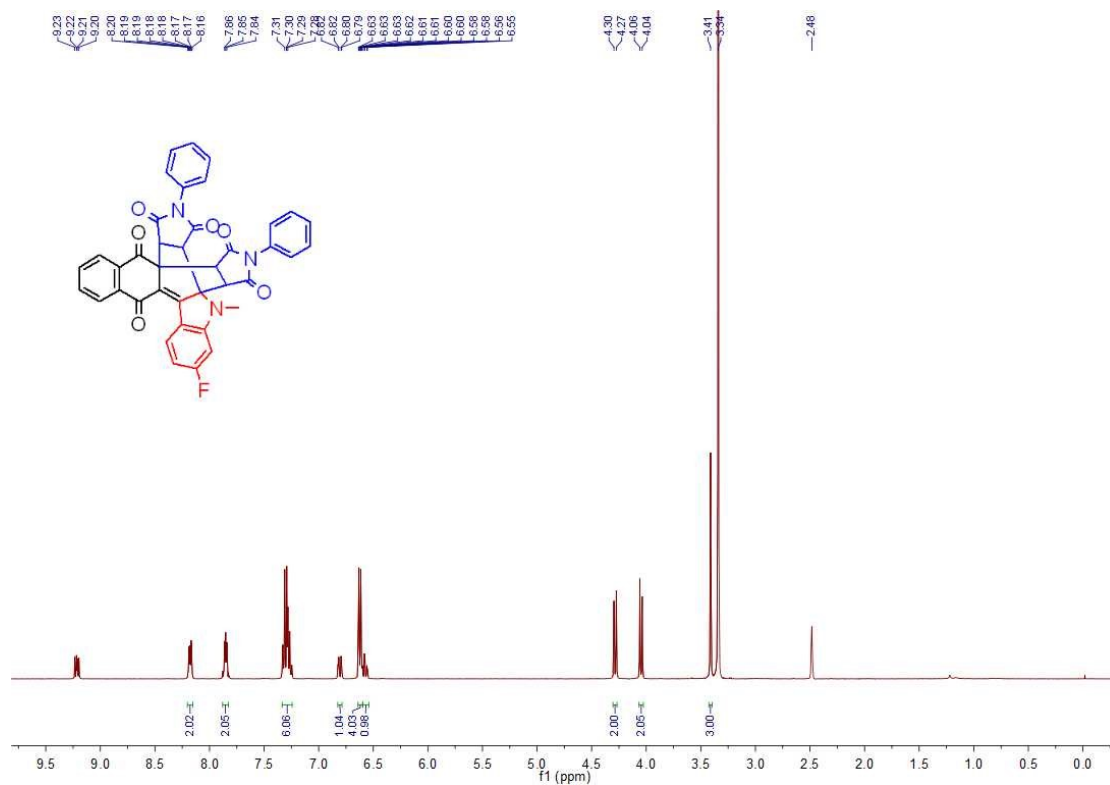

**<sup>13</sup>C NMR (101 MHz)**

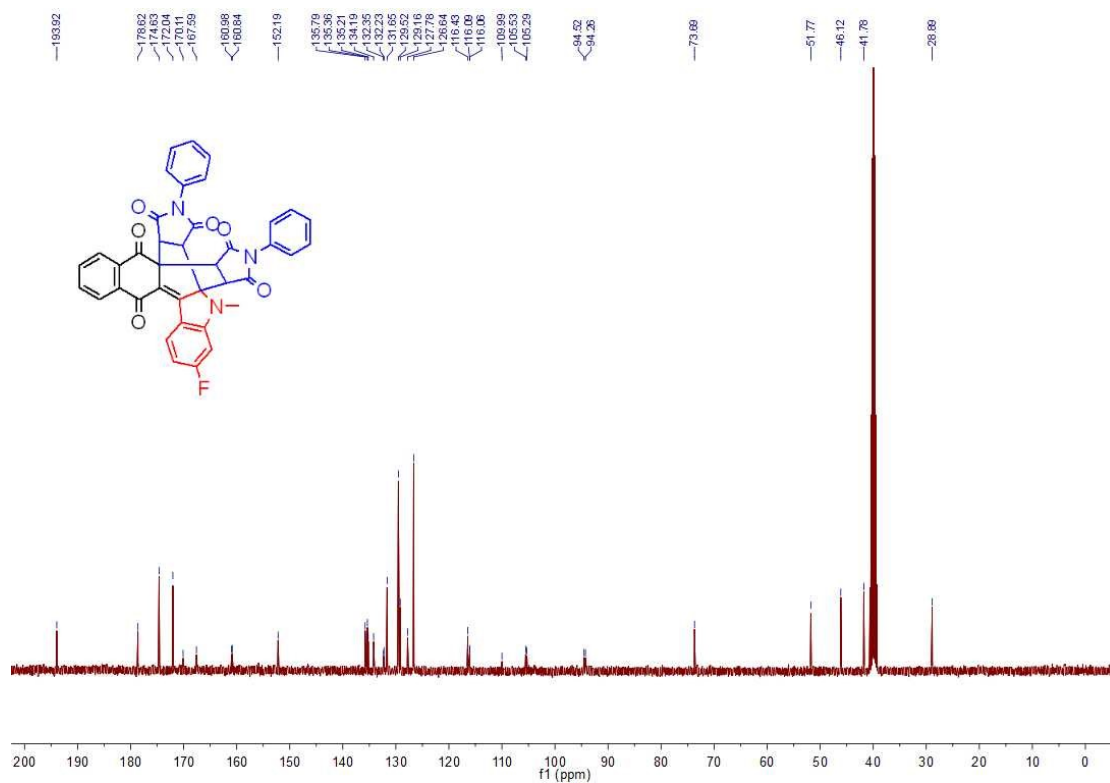

**<sup>19</sup>F NMR (376 MHz)**

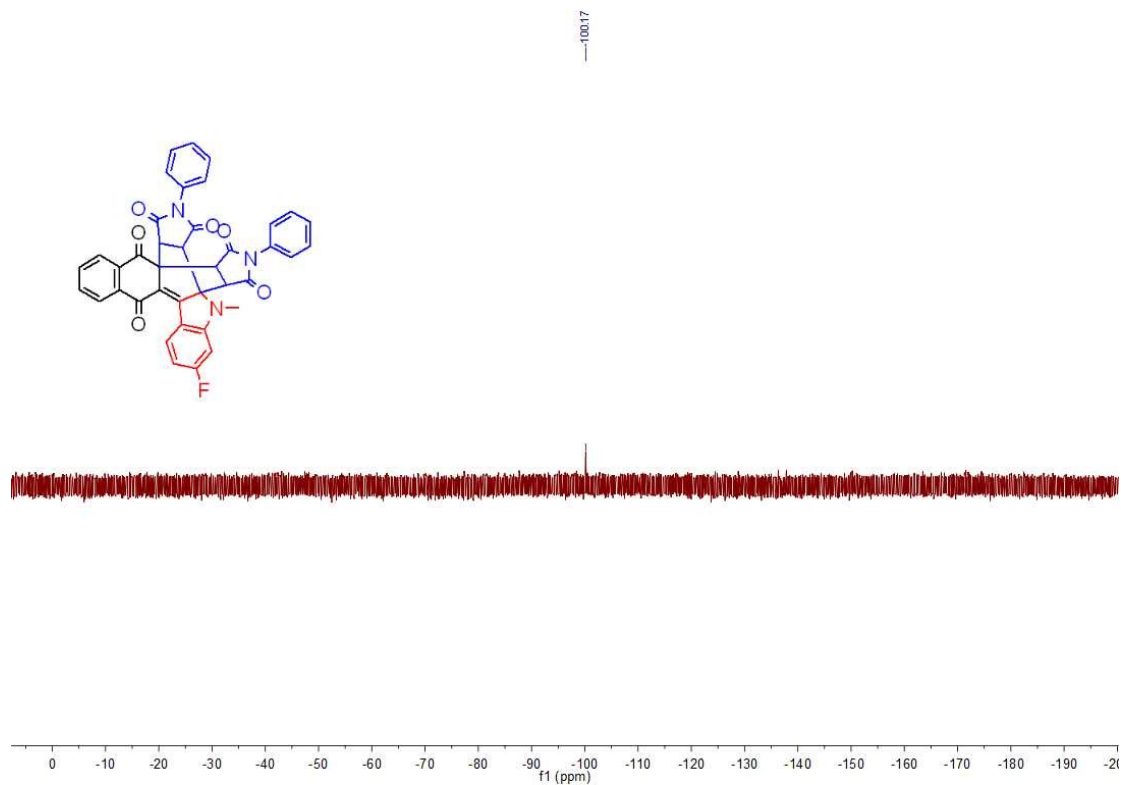

4,5-dimethyl-7,17-diphenyl-5b,8a-dihydro-5H,6H-5a,8b-[3,4]epipyrrolonaphtho[2,3-c]pyrrolo[3,4-a]carbazole-6,8,9,14,16,18(7H)-hexaone (**4p**)

<sup>1</sup>H NMR (400 MHz)

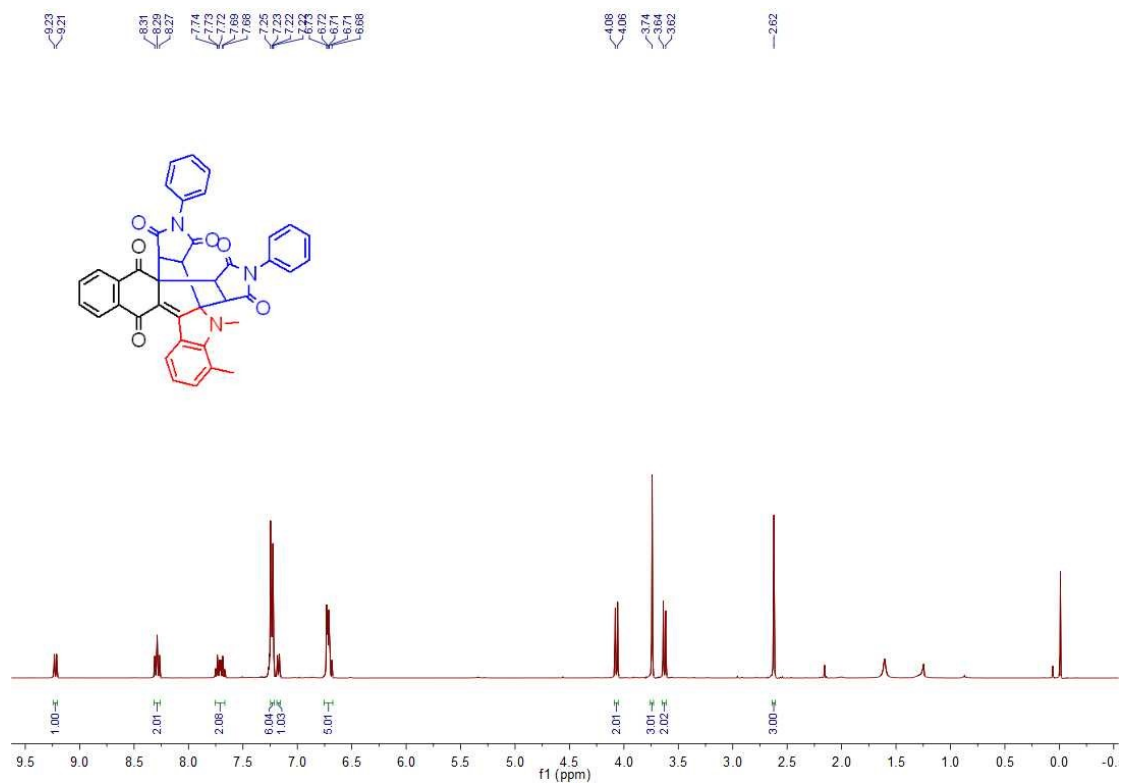

**<sup>13</sup>C NMR (101 MHz)**

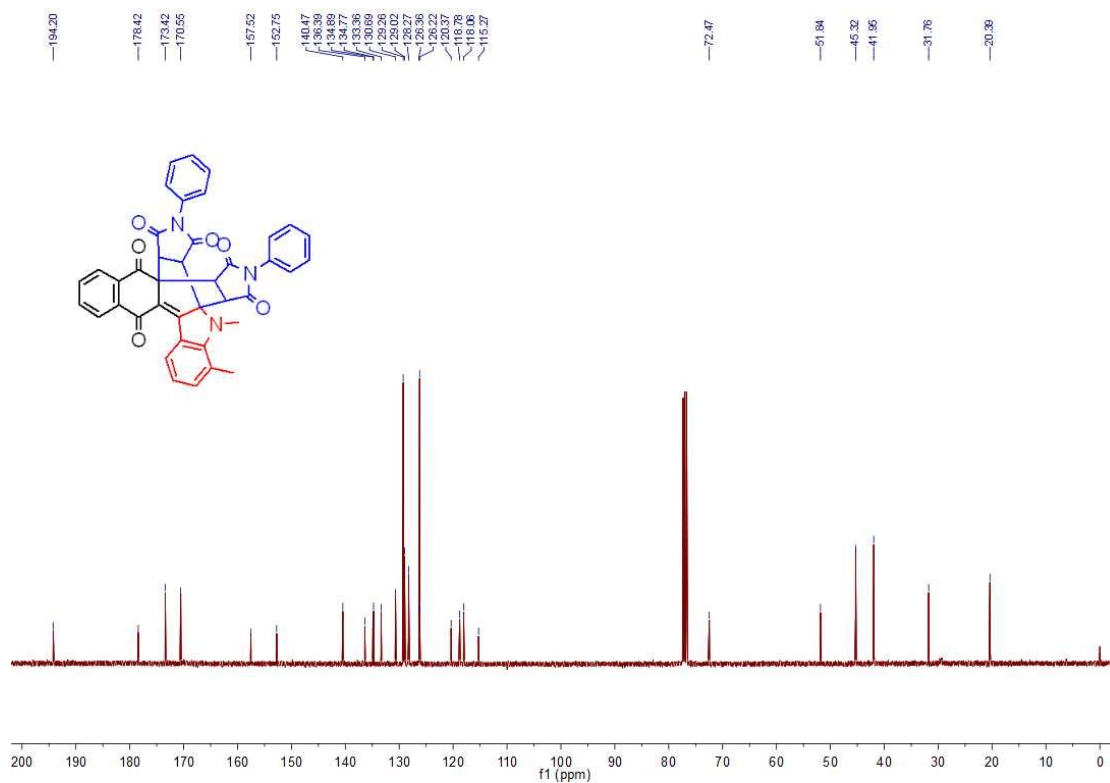

5-methyl-7,19-diphenyl-5b,8a-dihydro-5H,6H-5a,8b-[3,4]epipyrroloanthra[2,3-

c]pyrrolo[3,4-*a*]carbazole-6,8,9,16,18,20(7*H*)-hexaone (**4s**)

<sup>1</sup>H NMR (400 MHz)

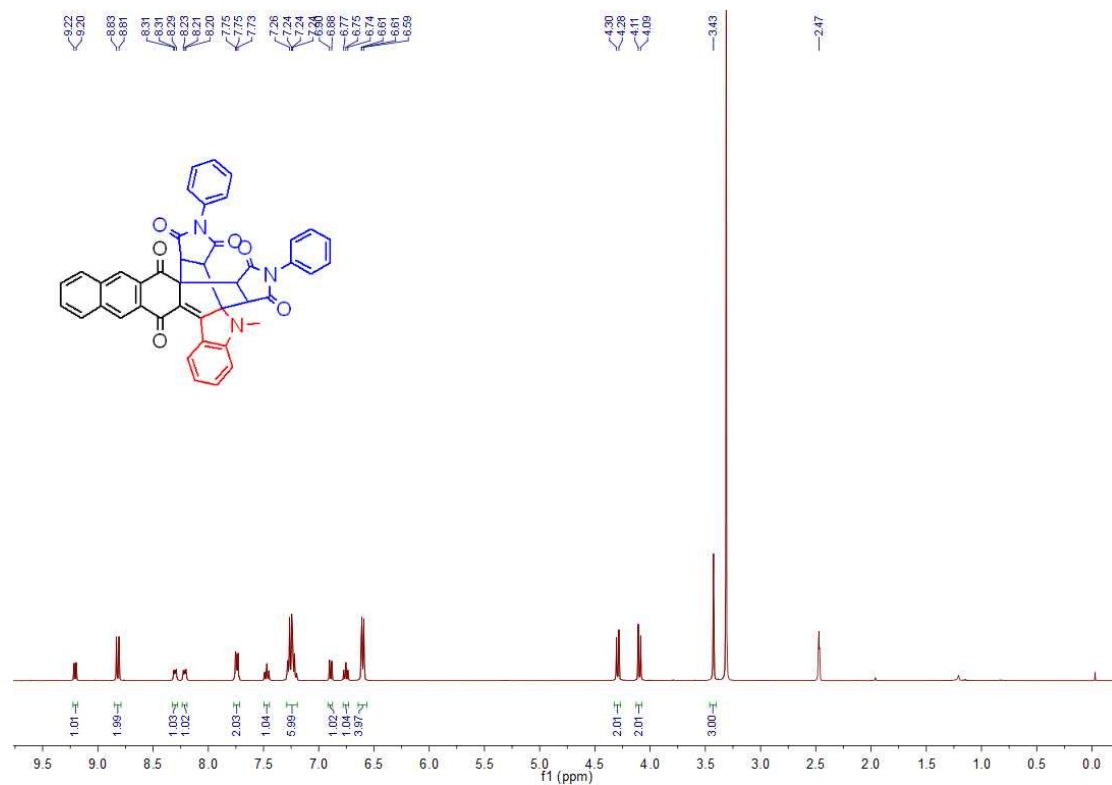

<sup>13</sup>C NMR (101 MHz)

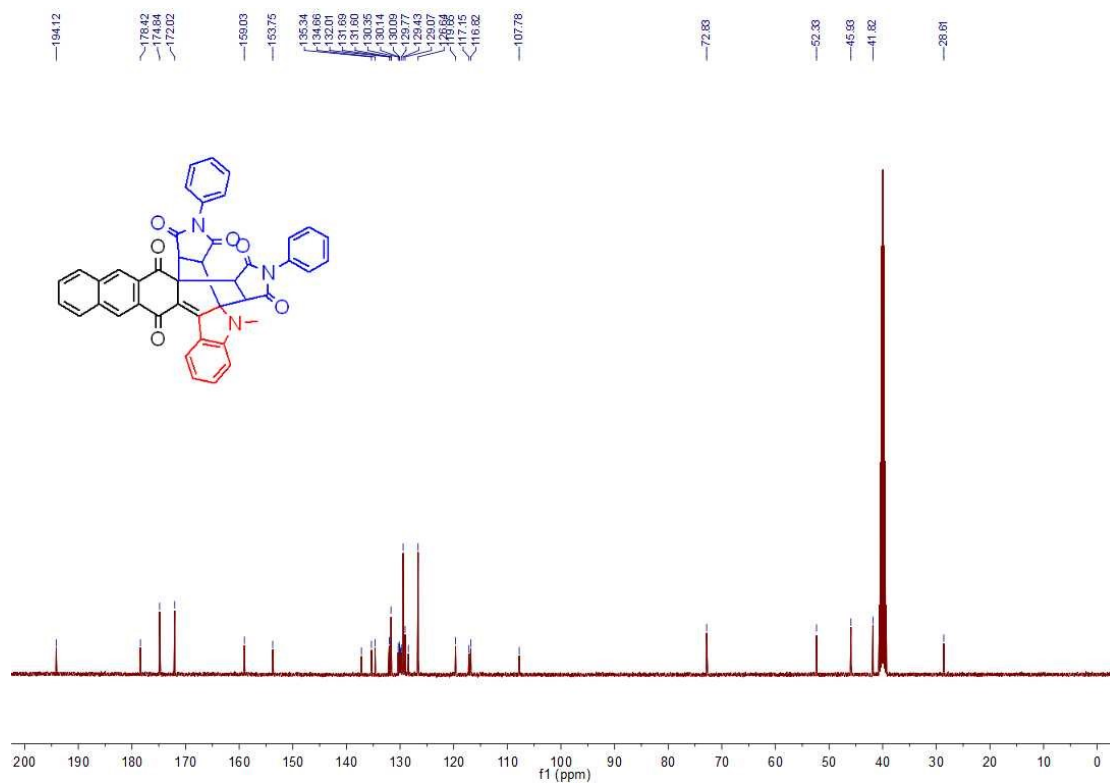

10,13-dihydroxy-5-methyl-7,17-diphenyl-5b,8a-dihydro-5H,6H-5a,8b-[3,4]epipyrrolonaphtho[2,3-c]pyrrolo[3,4-a]carbazole-6,8,9,14,16,18(7H)-hexaone (**4t**)  
<sup>1</sup>H NMR (400 MHz)



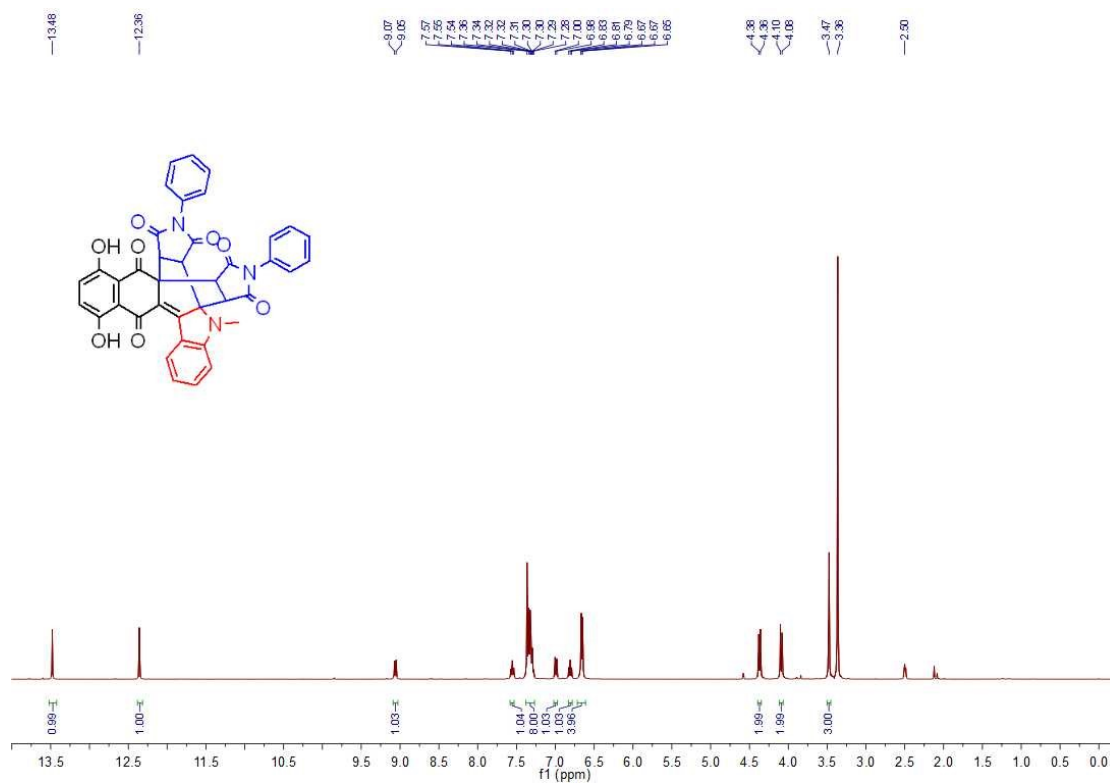

**<sup>13</sup>C NMR (101 MHz)**

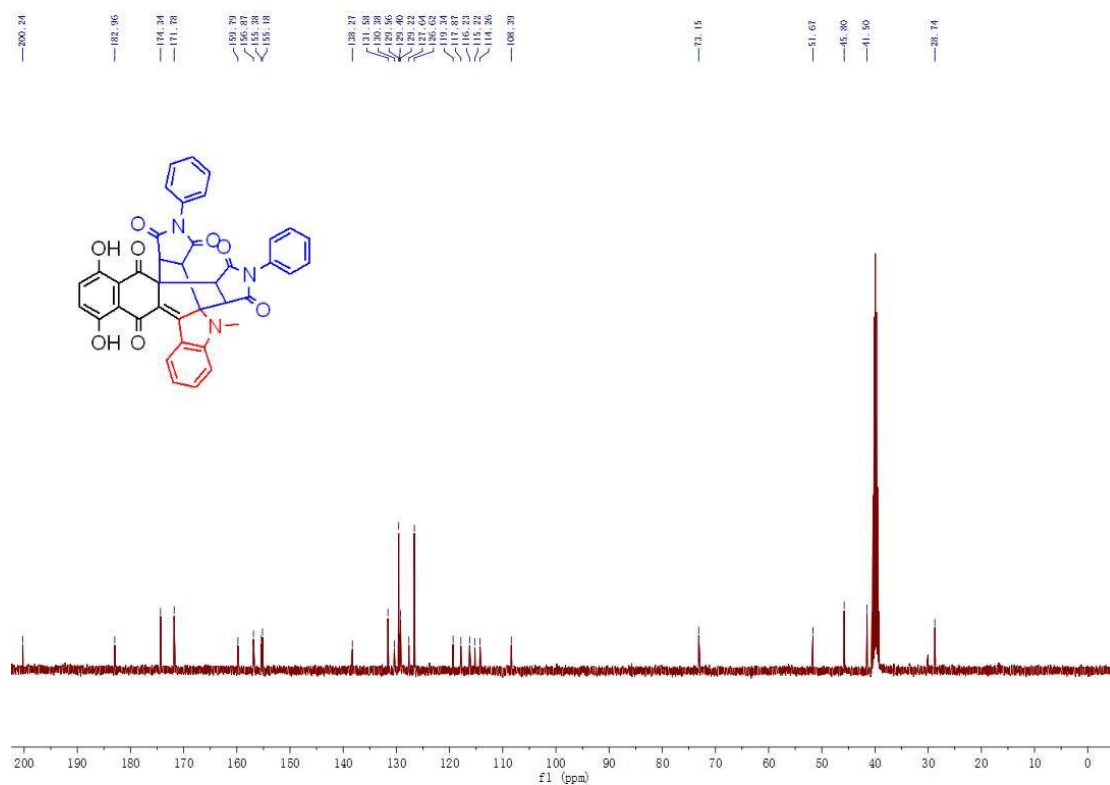

11,12-dibromo-5-methyl-7,17-diphenyl-5b,8a-dihydro-5H,6H-5a,8b-

[3,4]epipyrrolonaphtho[2,3-*c*]pyrrolo[3,4-*a*]carbazole-6,8,9,14,16,18(7*H*)-hexaone

(4u)

<sup>1</sup>H NMR (400 MHz)

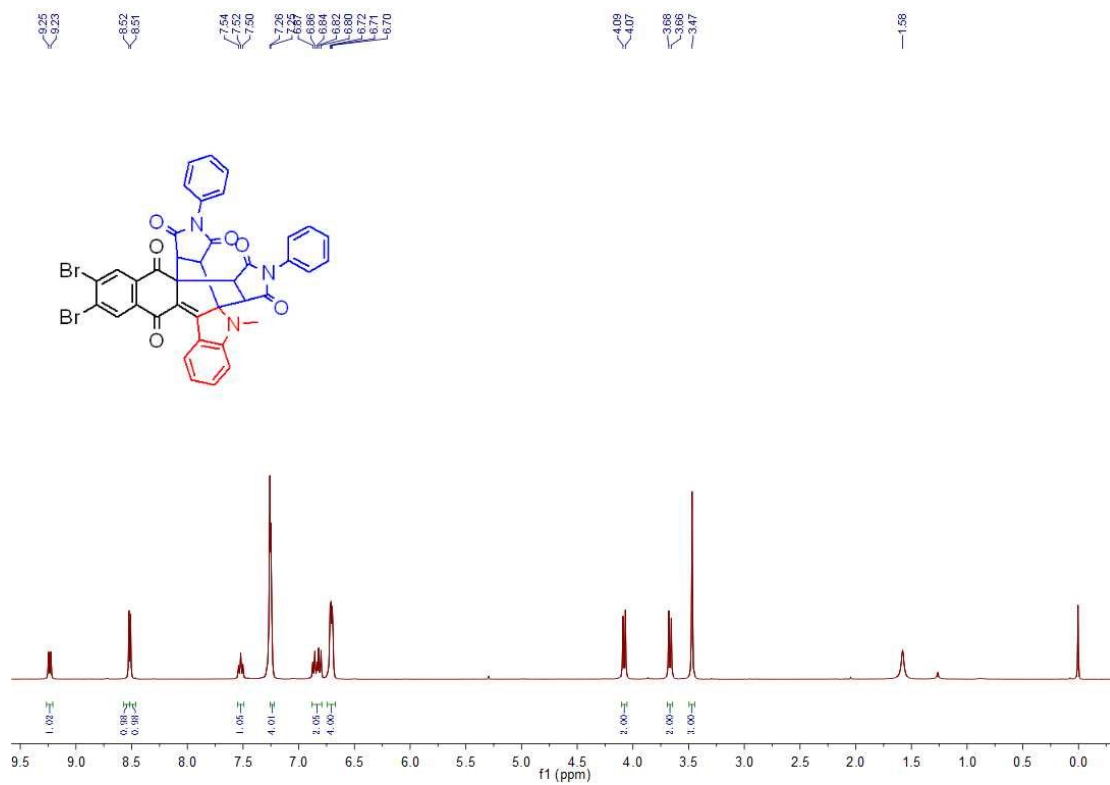

<sup>13</sup>C NMR (101 MHz)

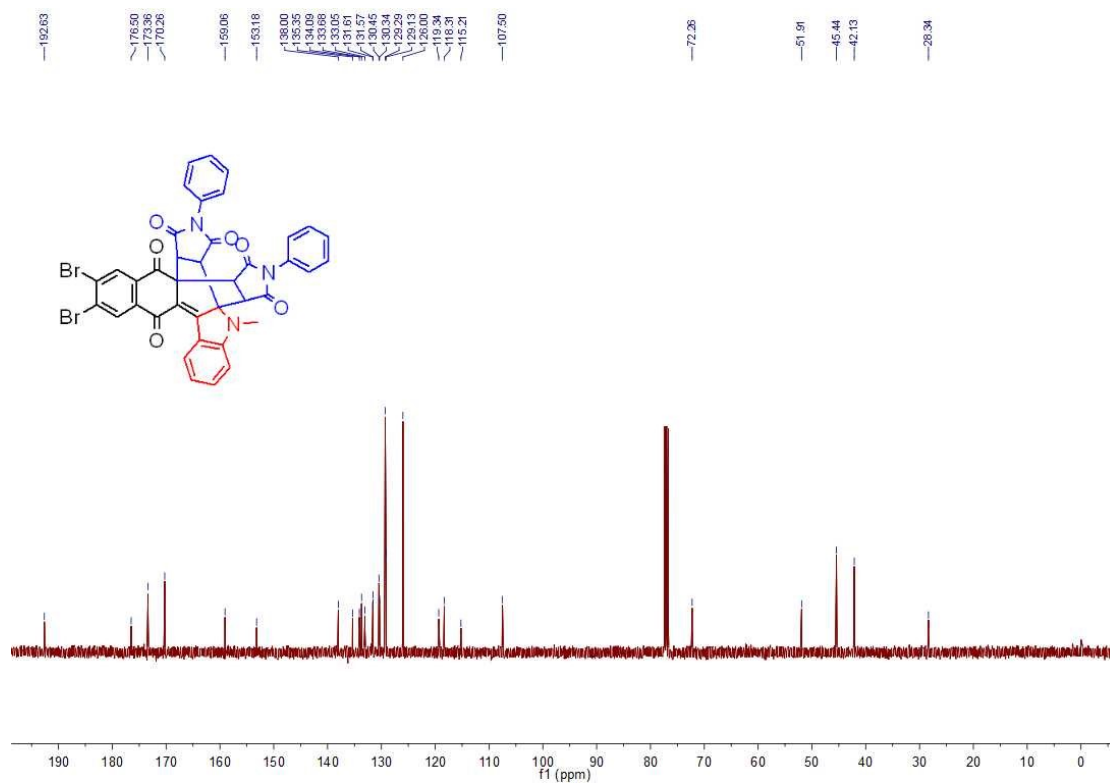

5-methyl-5b,8a-dihydro-5H,6H-5a,8b-[3,4]epipyrrolonaphtho[2,3-c]pyrrolo[3,4-a]carbazole-6,8,9,14,16,18(7H)-hexaone (**5a**)

$^1\text{H NMR}$  (400 MHz)

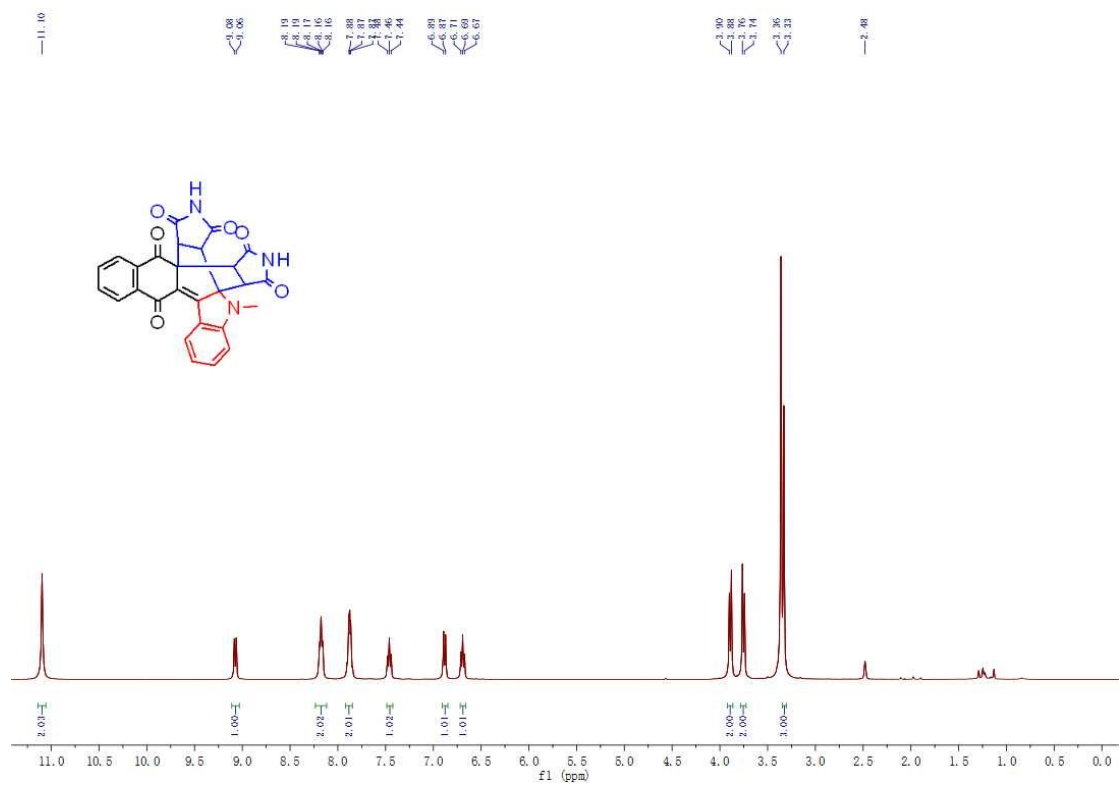

**<sup>13</sup>C NMR (101 MHz)**

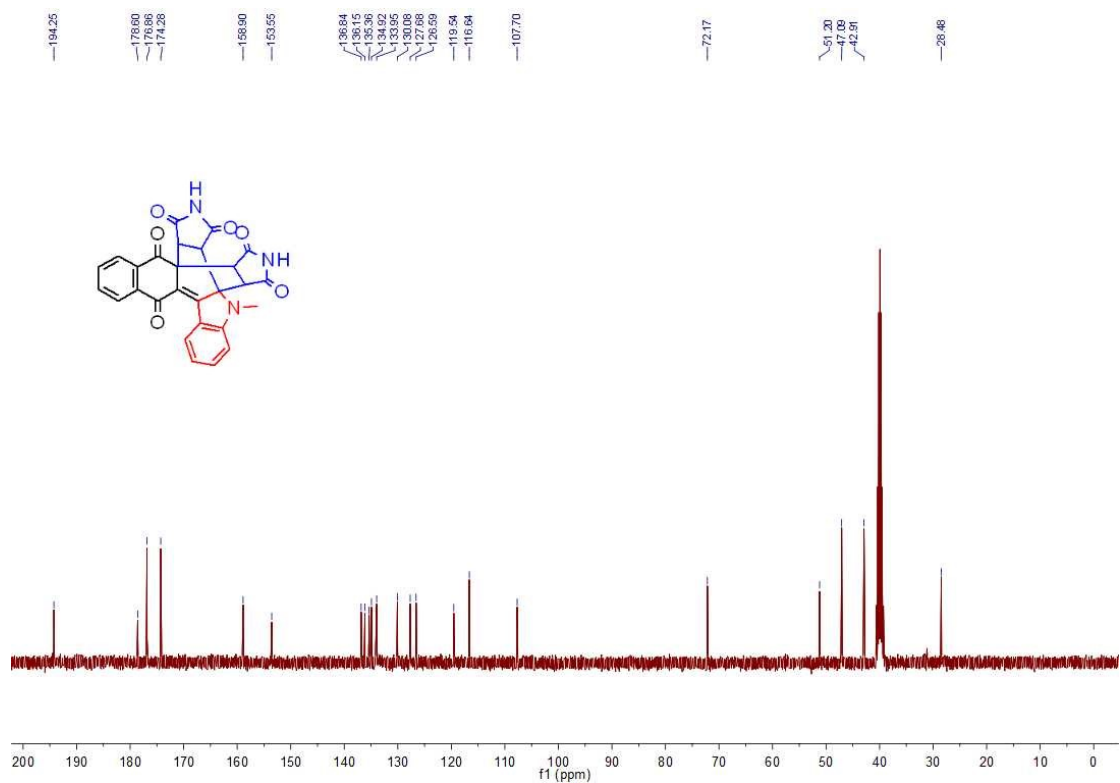

5,7,17-trimethyl-5b,8a-dihydro-5H,6H-5a,8b-[3,4]epipyrrolonaphtho[2,3-

c]pyrrolo[3,4-a]carbazole-6,8,9,14,16,18(7H)-hexaone (**5b**)

<sup>1</sup>H NMR (400 MHz)

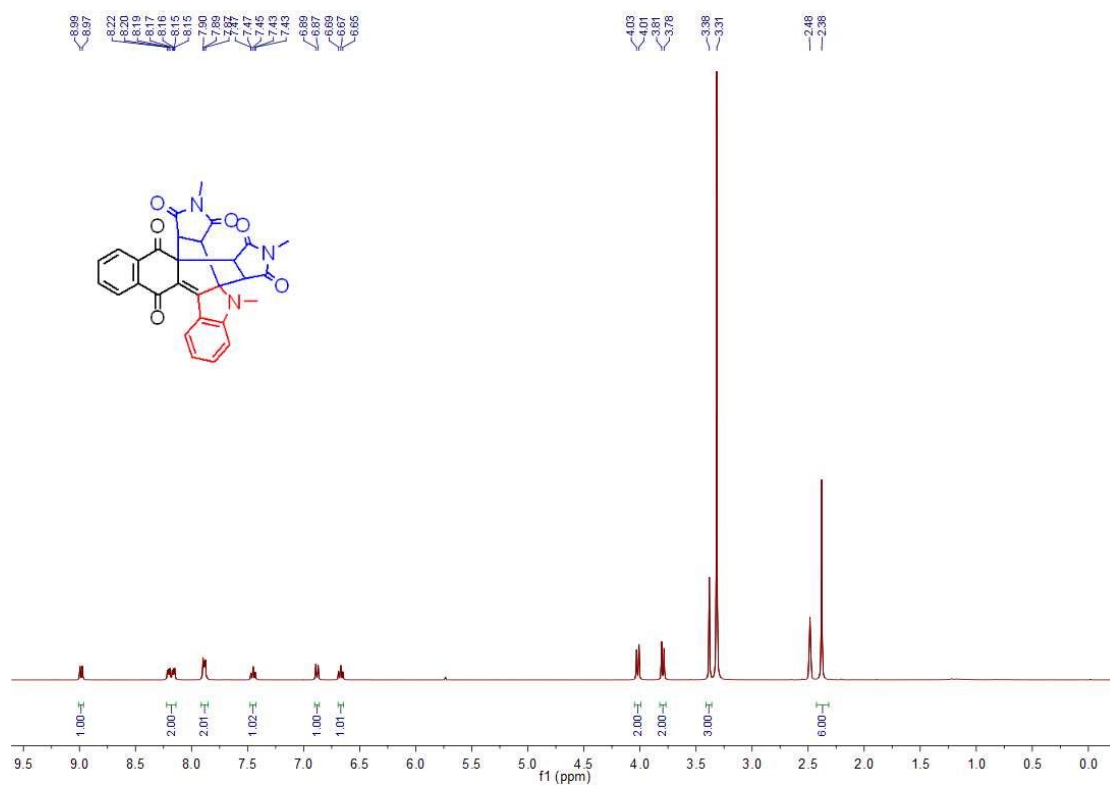

<sup>13</sup>C NMR (101 MHz)

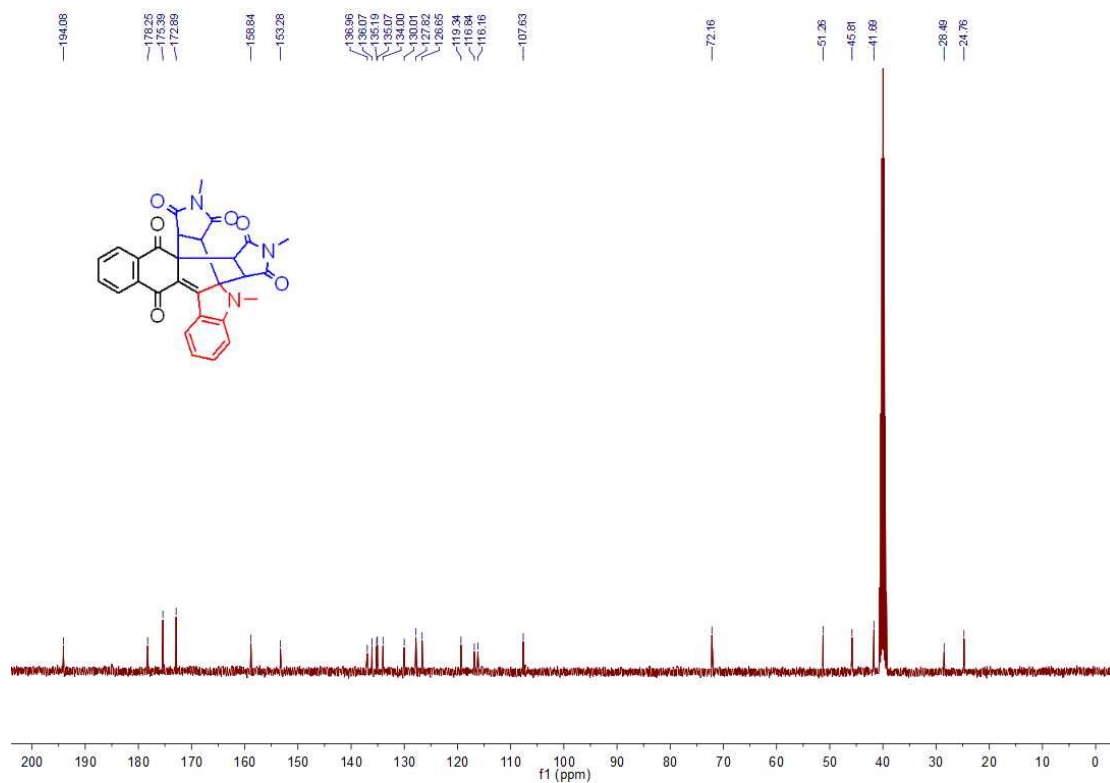

5-methyl-7,17-dipropyl-5b,8a-dihydro-5H,6H-5a,8b-[3,4]epipyrrolonaphtho[2,3-c]pyrrolo[3,4-a]carbazole-6,8,9,14,16,18(7H)-hexaone (**5c**)

<sup>1</sup>H NMR (400 MHz)

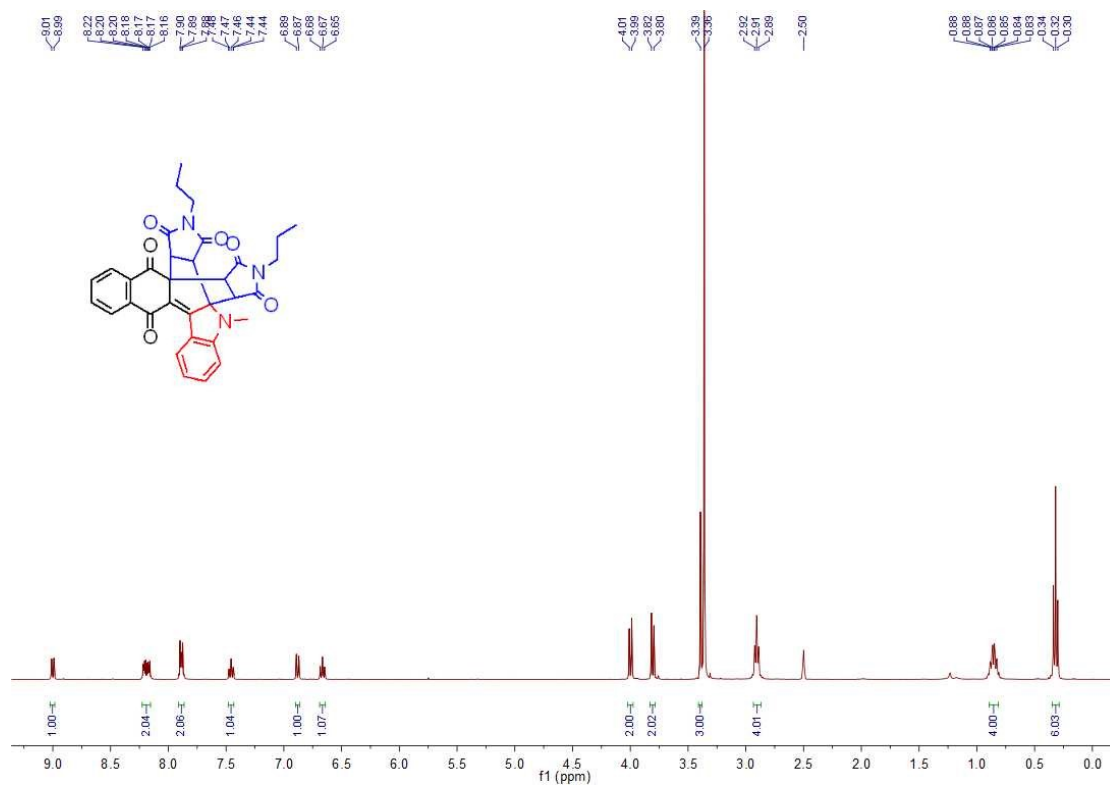

**<sup>13</sup>C NMR (101 MHz)**

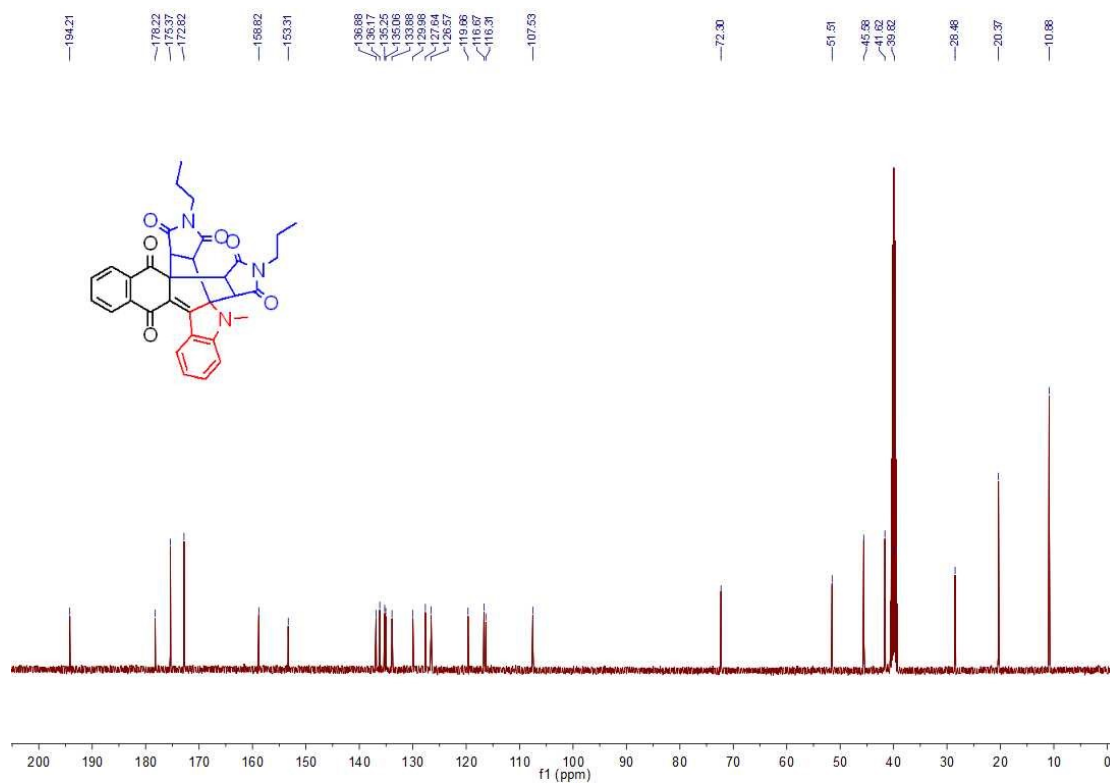

7,17-dicyclohexyl-5-methyl-5b,8a-dihydro-5H,6H-5a,8b-[3,4]epipyrrolonaphtho[2,3-

c]pyrrolo[3,4-a]carbazole-6,8,9,14,16,18(7H)-hexaone (**5d**)

<sup>1</sup>H NMR (400 MHz)

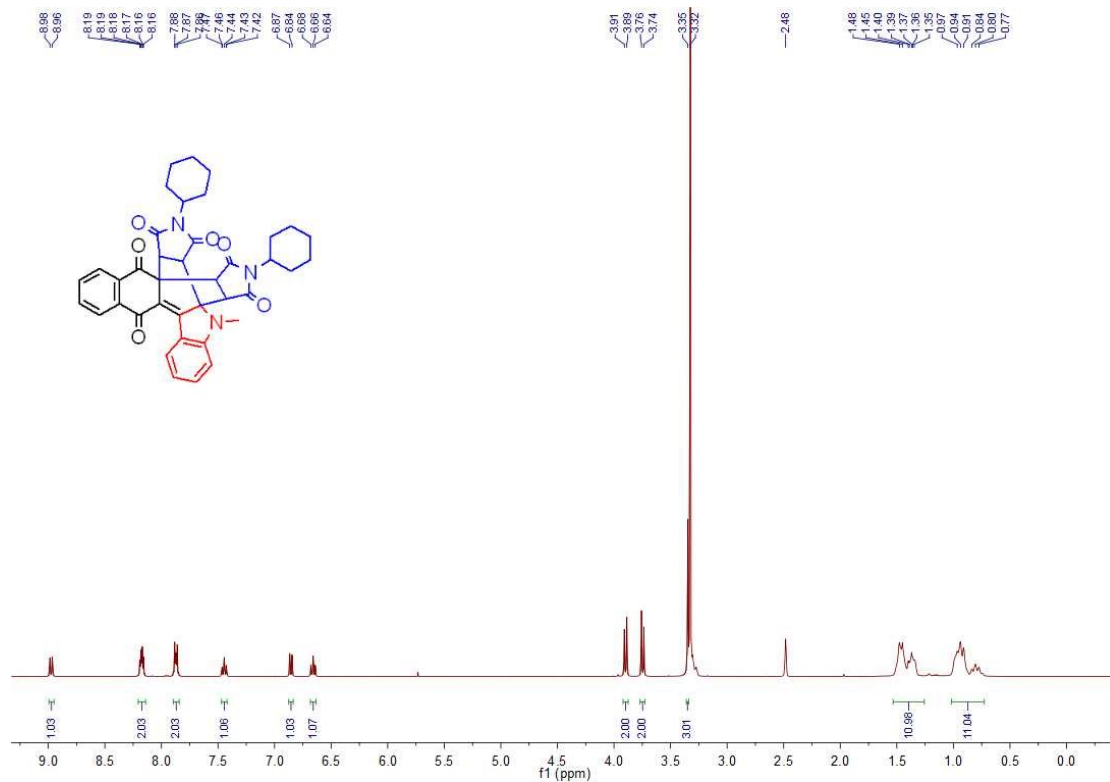

<sup>13</sup>C NMR (101 MHz)



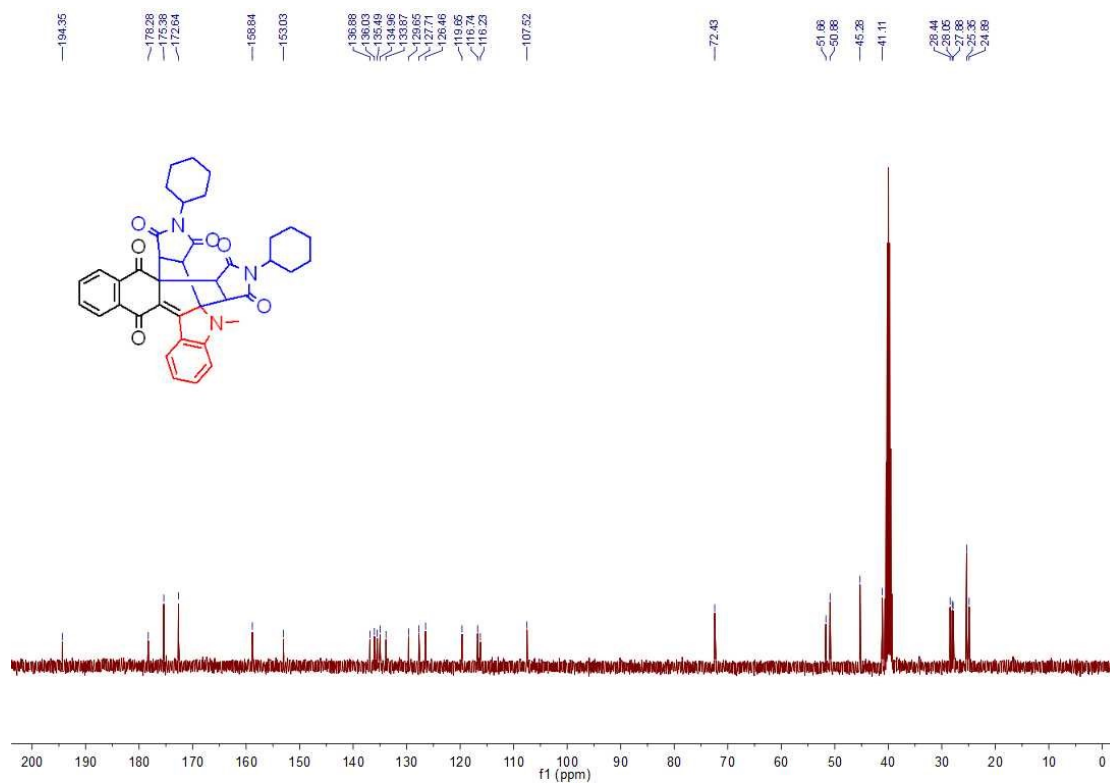

7,17-bis(4-methoxyphenyl)-5-methyl-5b,8a-dihydro-5H,6H-5a,8b-  
 [3,4]epipyrrolonaphtho[2,3-c]pyrrolo[3,4-a]carbazole-6,8,9,14,16,18(7H)-hexaone  
 (5e)

$^{13}\text{C}$  NMR (400 MHz)

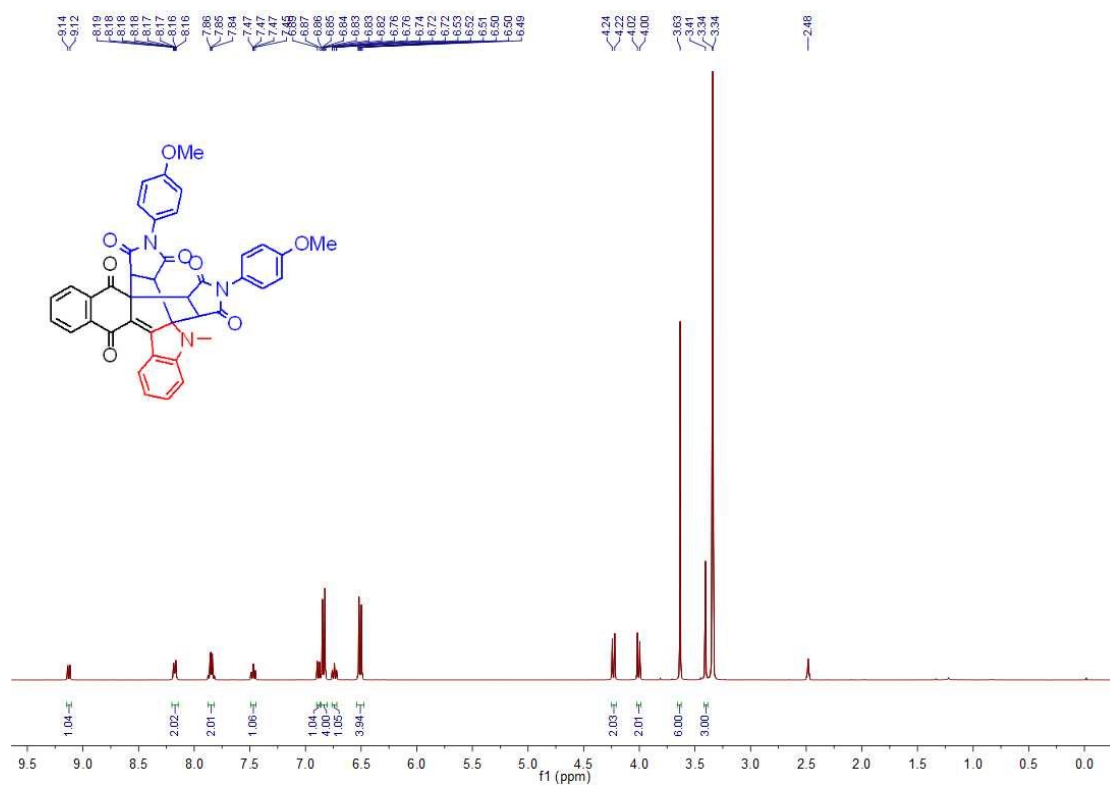

**<sup>13</sup>C NMR (101 MHz)**

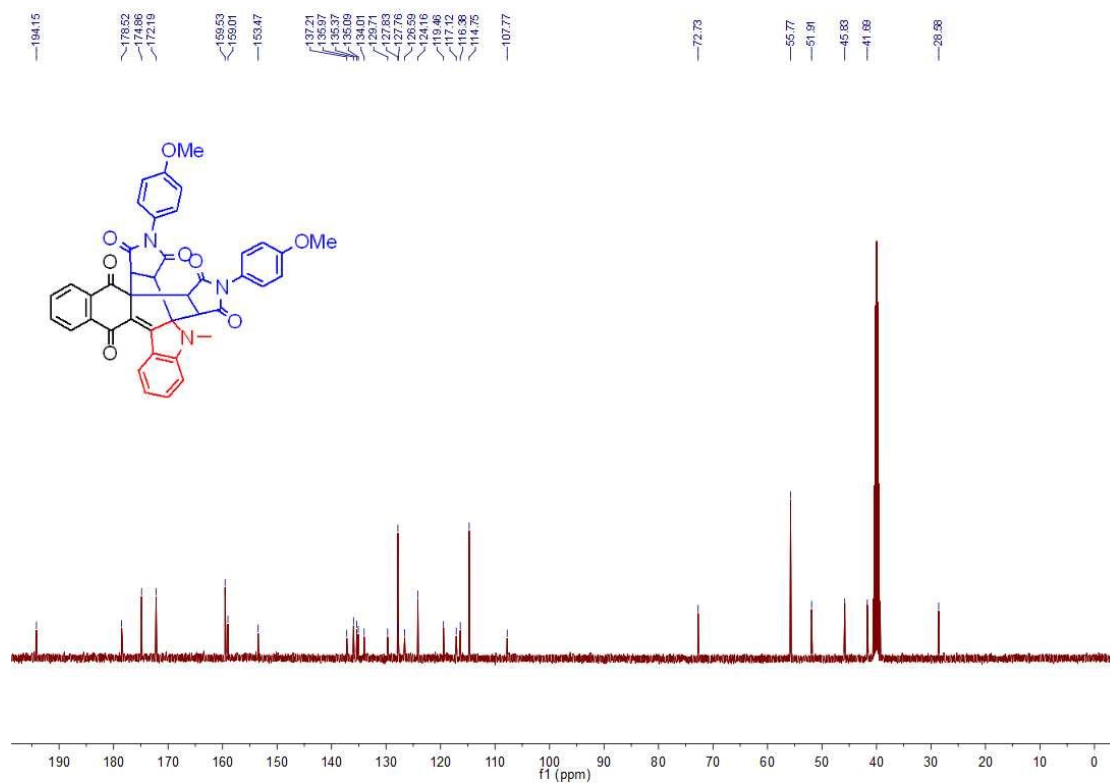

5-methyl-7,17-bis(4-(methylthio)phenyl)-5b,8a-dihydro-5H,6H-5a,8b-

[3,4]epipyrrolonaphtho[2,3-c]pyrrolo[3,4-a]carbazole-6,8,9,14,16,18(7H)-hexaone (**5f**)

$^1\text{H}$  NMR (400 MHz)

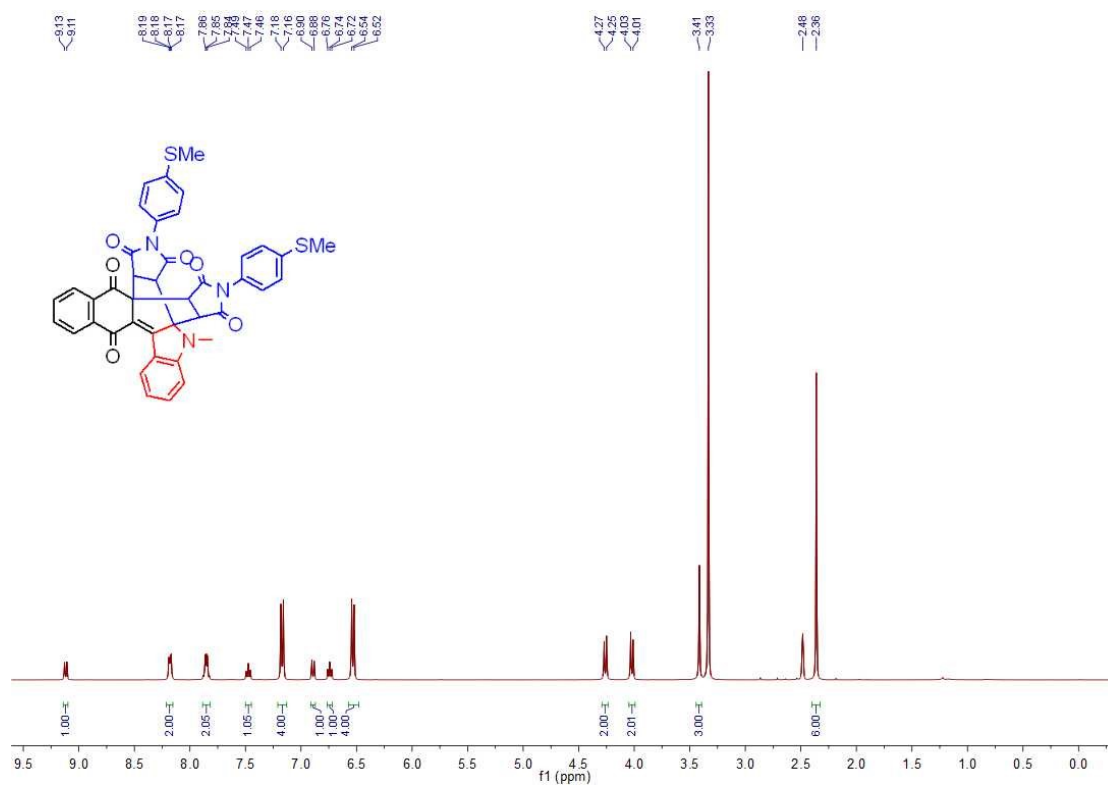

$^{13}\text{C}$  NMR (101 MHz)

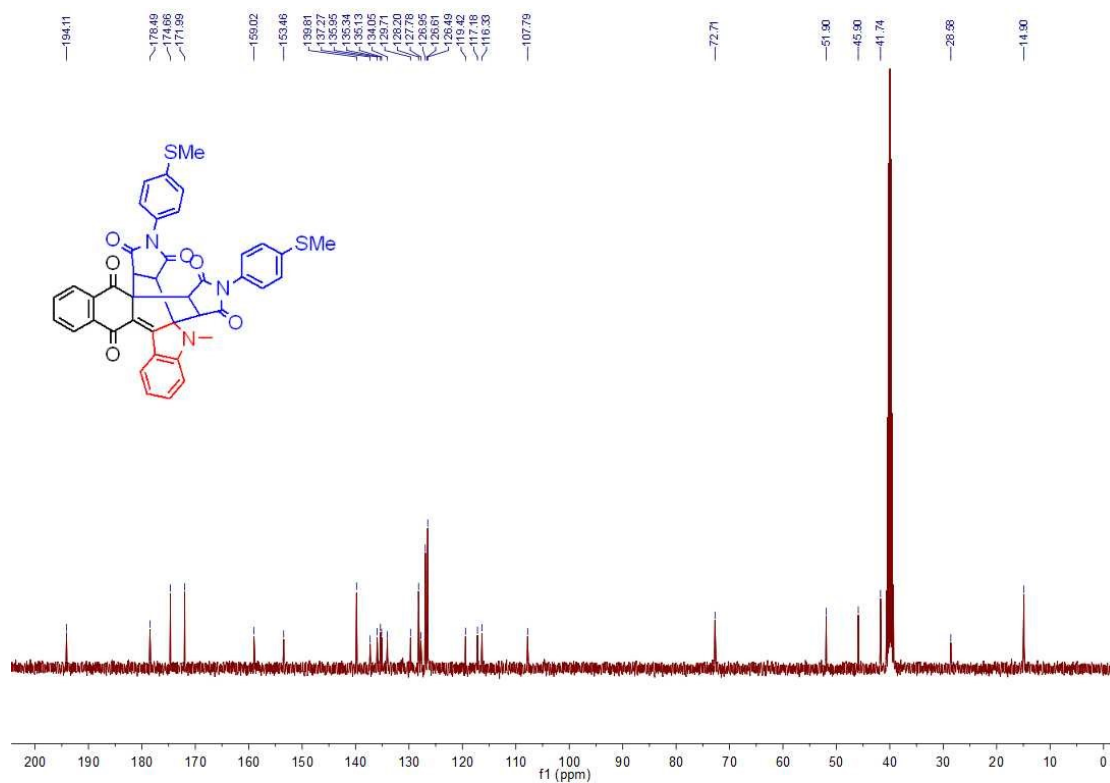

7,17-bis(4-bromophenyl)-5-methyl-5b,8a-dihydro-5H,6H-5a,8b-  
 [3,4]epipyrrolonaphtho[2,3-c]pyrrolo[3,4-a]carbazole-6,8,9,14,16,18(7H)-hexaone  
 (5g)

<sup>1</sup>H NMR (400 MHz)

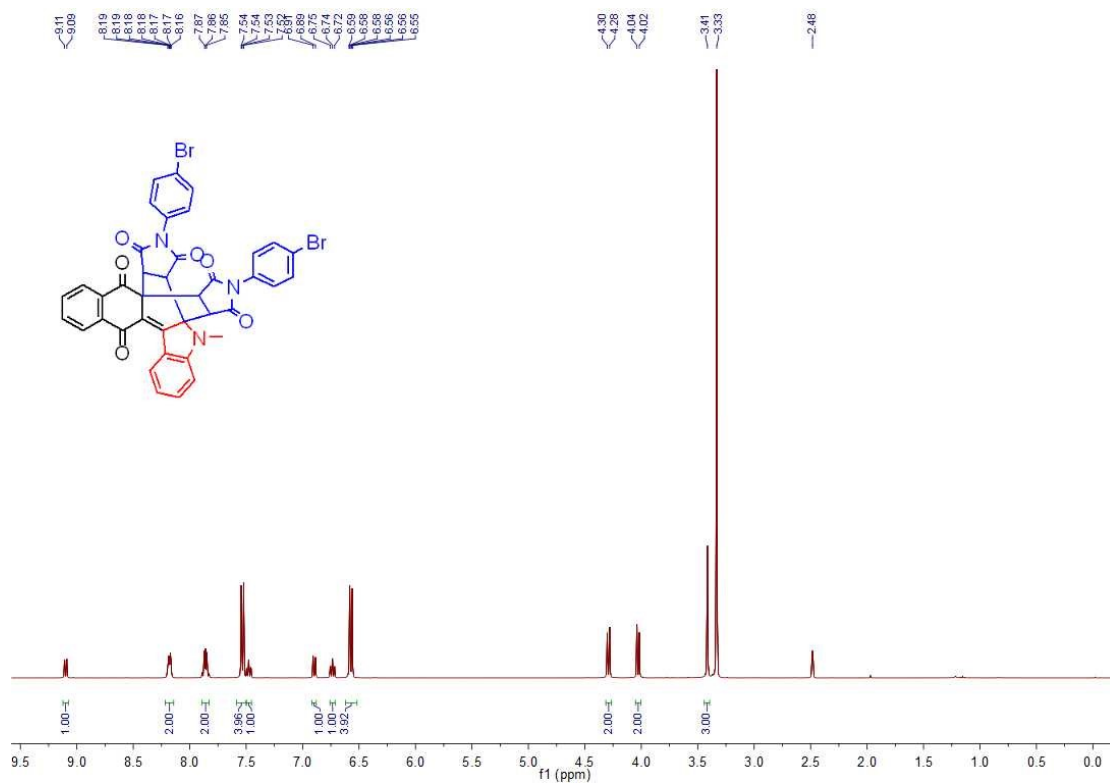

**<sup>13</sup>C NMR (101 MHz)**

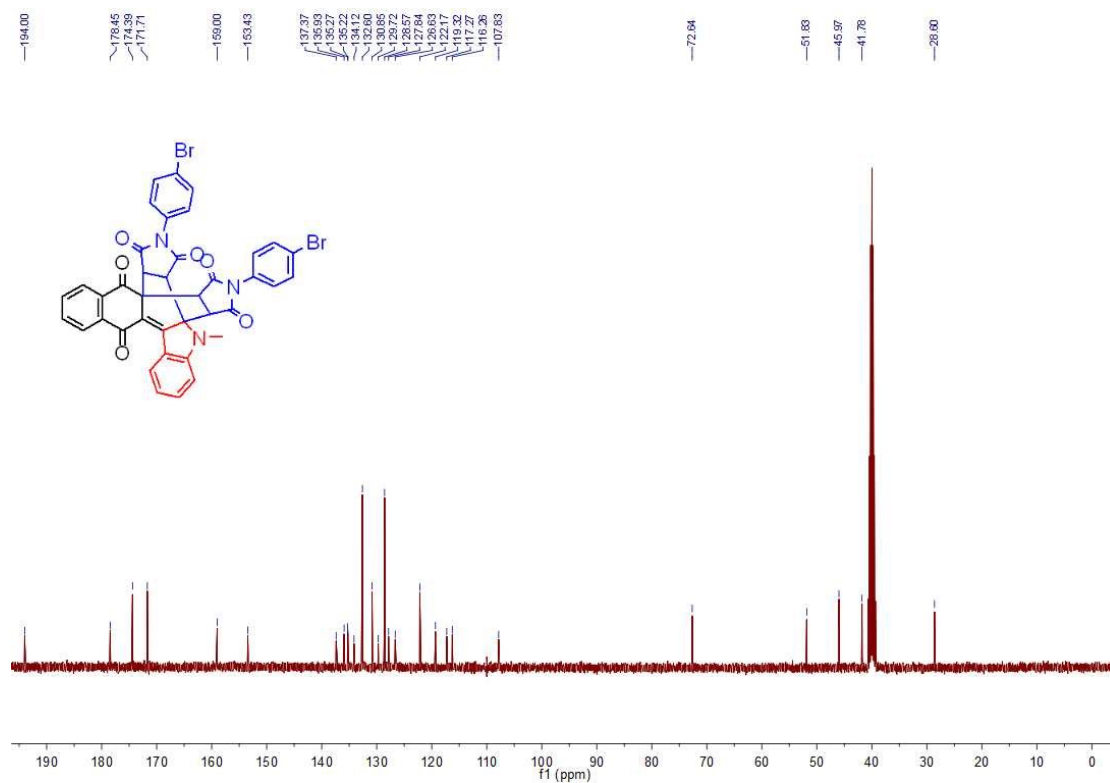

4,4'-(5-methyl-6,8,9,14,16,18-hexaoxo-5b,6,8,8a,9,14-hexahydro-5H,7H-5a,8b-

[3,4]epipyrrolonaphtho[2,3-c]pyrrolo[3,4-a]carbazole-7,17-diyl)dibenzonitrile (**5h**)

<sup>1</sup>H NMR (400 MHz)

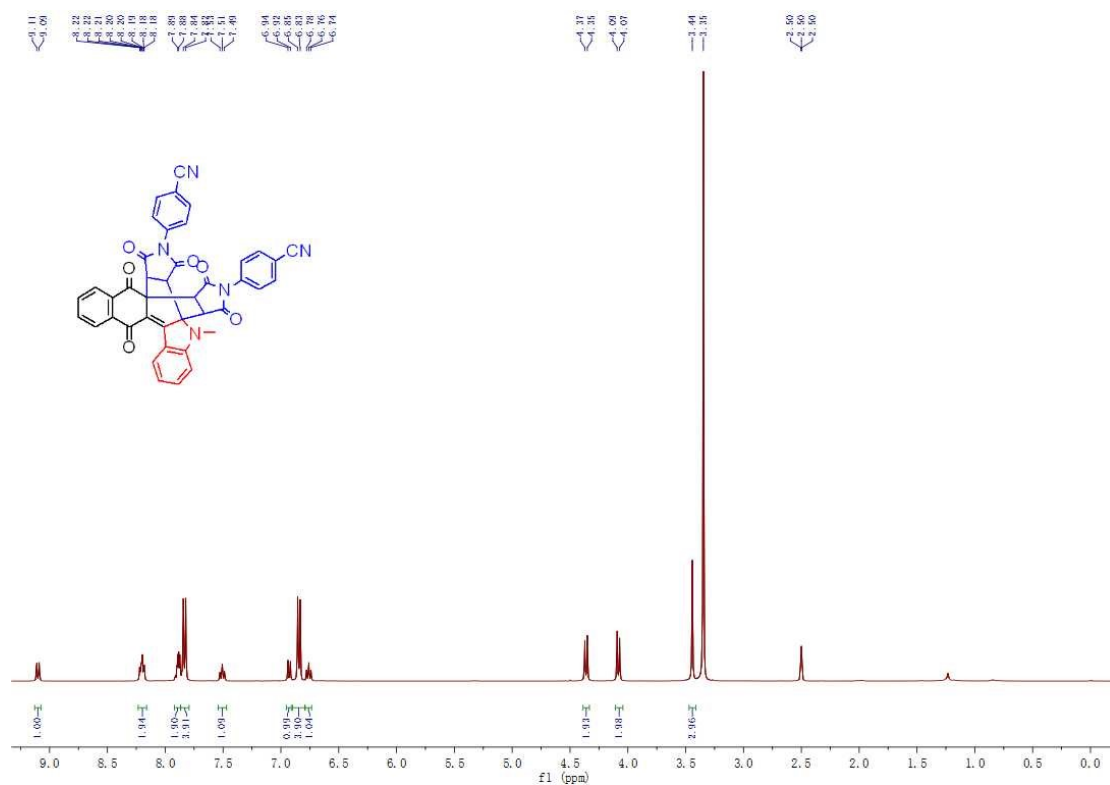

<sup>13</sup>C NMR (101 MHz)

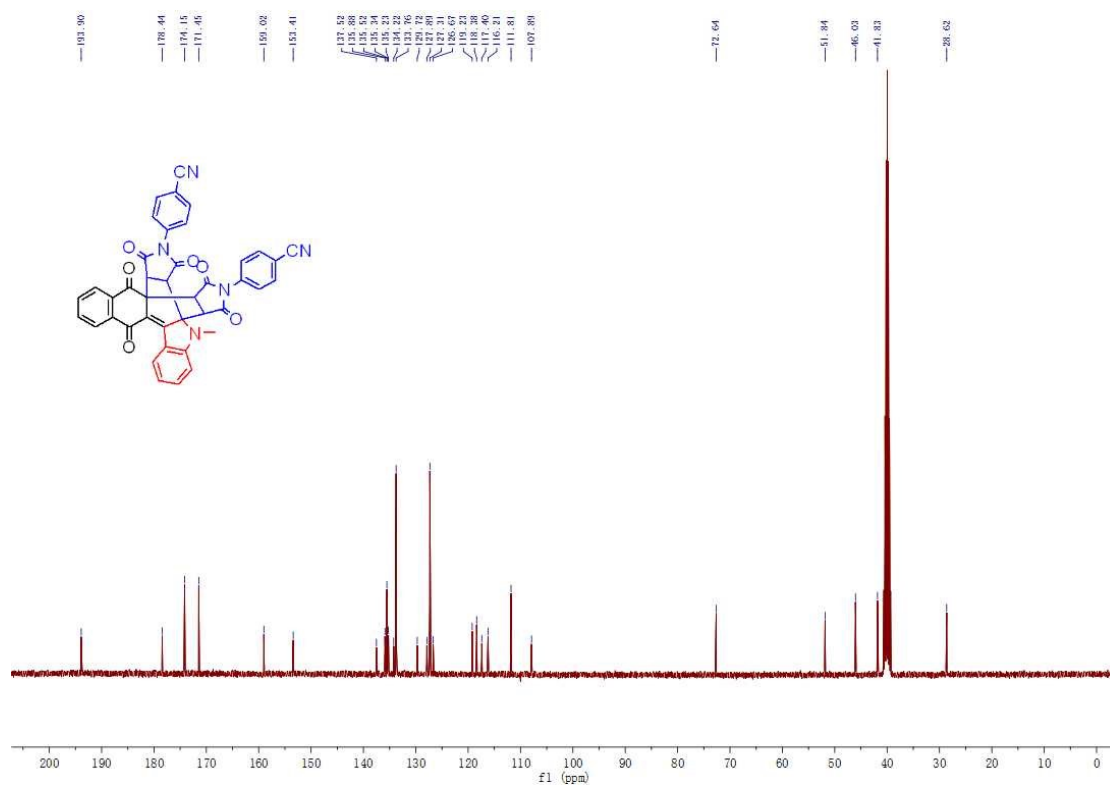

dimethyl 4,4'-(5-methyl-6,8,9,14,16,18-hexaoxo-5b,6,8,8a,9,14-hexahydro-5H,7H-5a,8b-[3,4]epipyrrolonaphtho[2,3-c]pyrrolo[3,4-a]carbazole-7,17-diyl)dibenzoate (**5i**)  
 $^1\text{H}$  NMR (400 MHz)

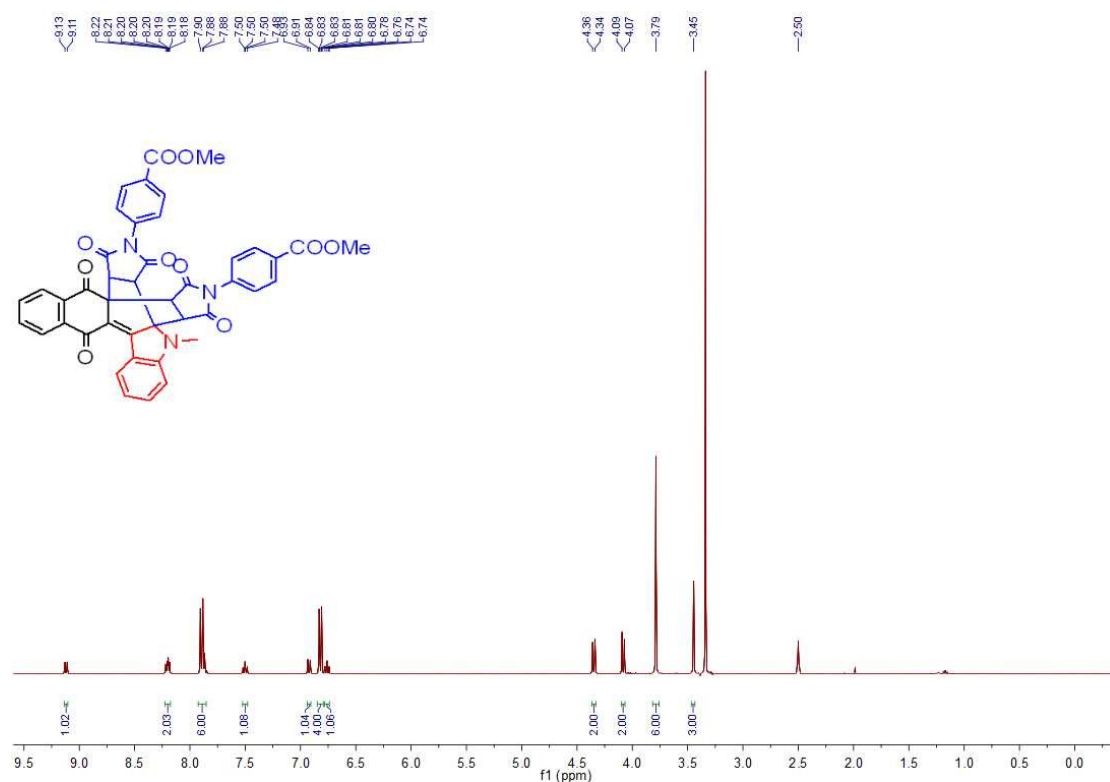

<sup>13</sup>C NMR (101 MHz)

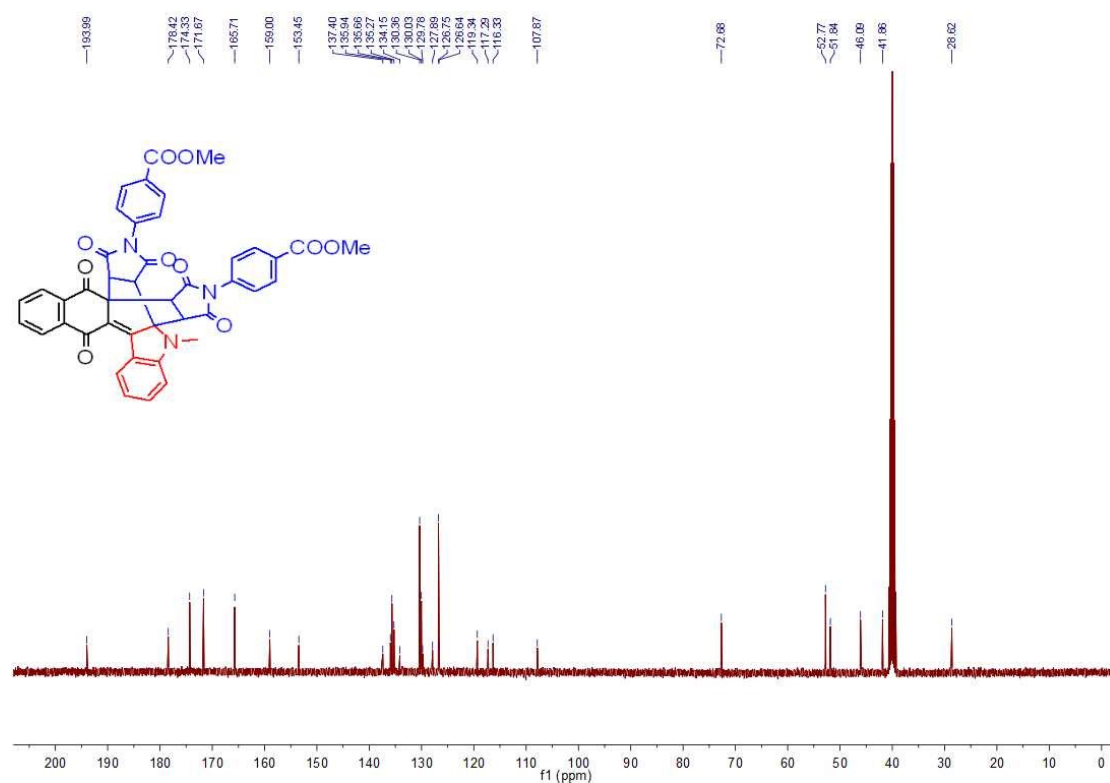

5-methyl-7,17-di-o-tolyl-5b,8a-dihydro-5H,6H-5a,8b-[3,4]epipyrrolonaphtho[2,3-



c]pyrrolo[3,4-a]carbazole-6,8,9,14,16,18(7H)-hexaone (**5j**)

$^1\text{H}$  NMR (400 MHz)

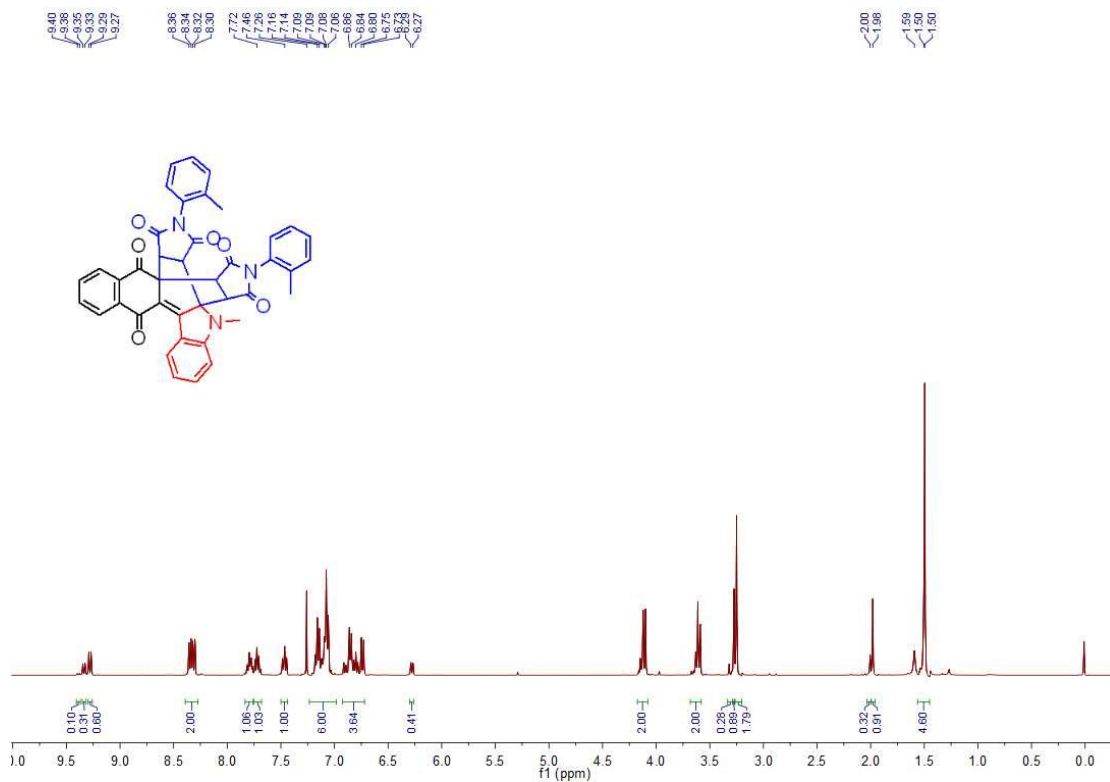

$^{13}\text{C}$  NMR (101 MHz)

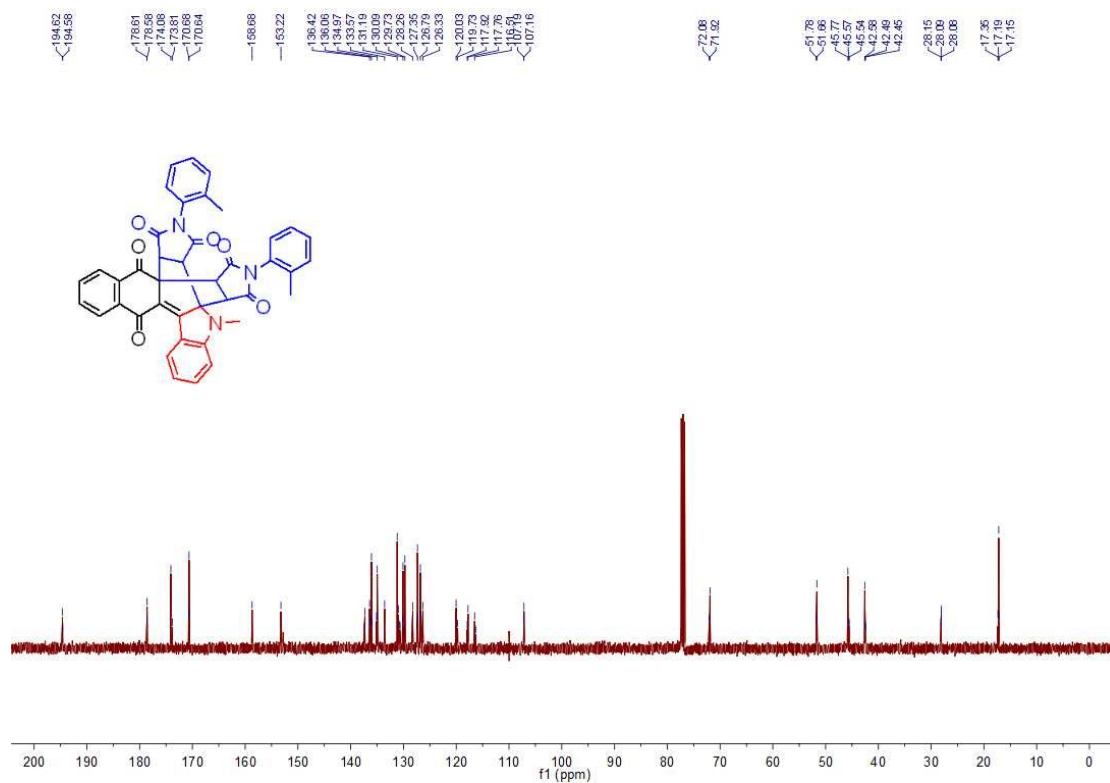

methyl 4-(7-(3-(methoxycarbonyl)thiophen-2-yl)-5-methyl-6,8,9,14,16,18-hexaoxo-5b,7,8,8a,9,14-hexahydro-5H,6H-5a,8b-[3,4]epipyrrolonaphtho[2,3-c]pyrrolo[3,4-a]carbazol-17-yl)thiophene-3-carboxylate (**5k**)

<sup>1</sup>H NMR (400 MHz)

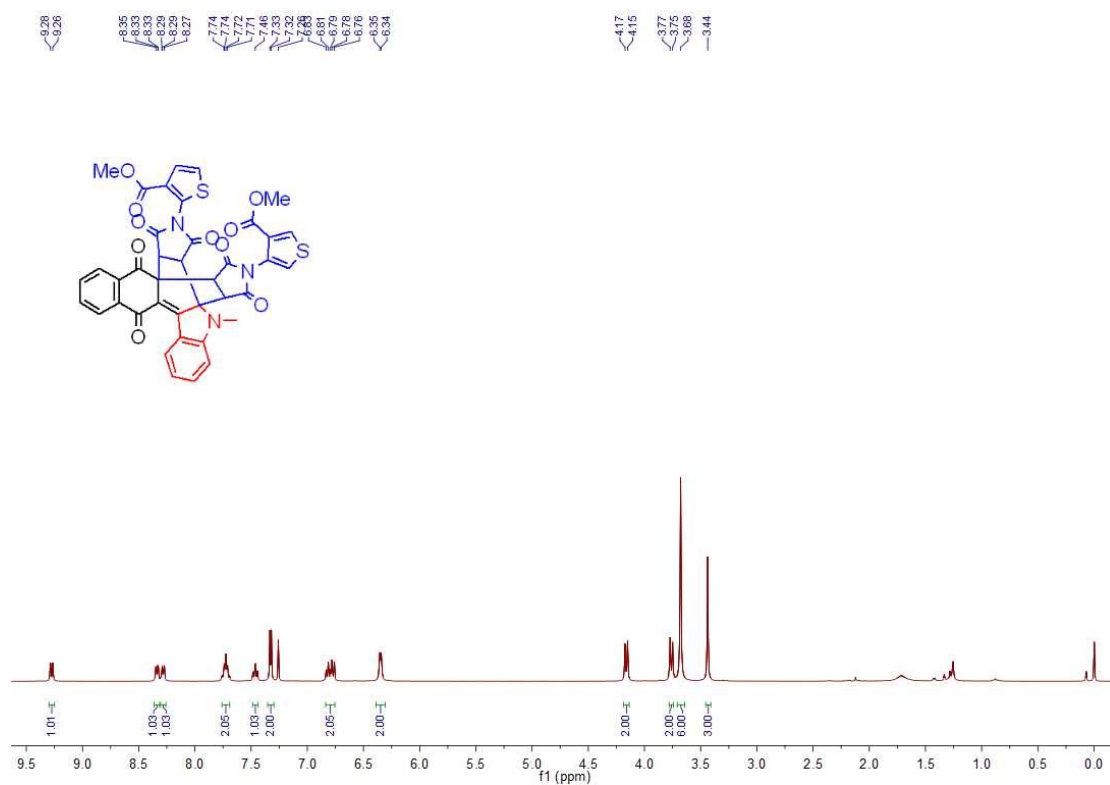

**<sup>13</sup>C NMR (101 MHz)**

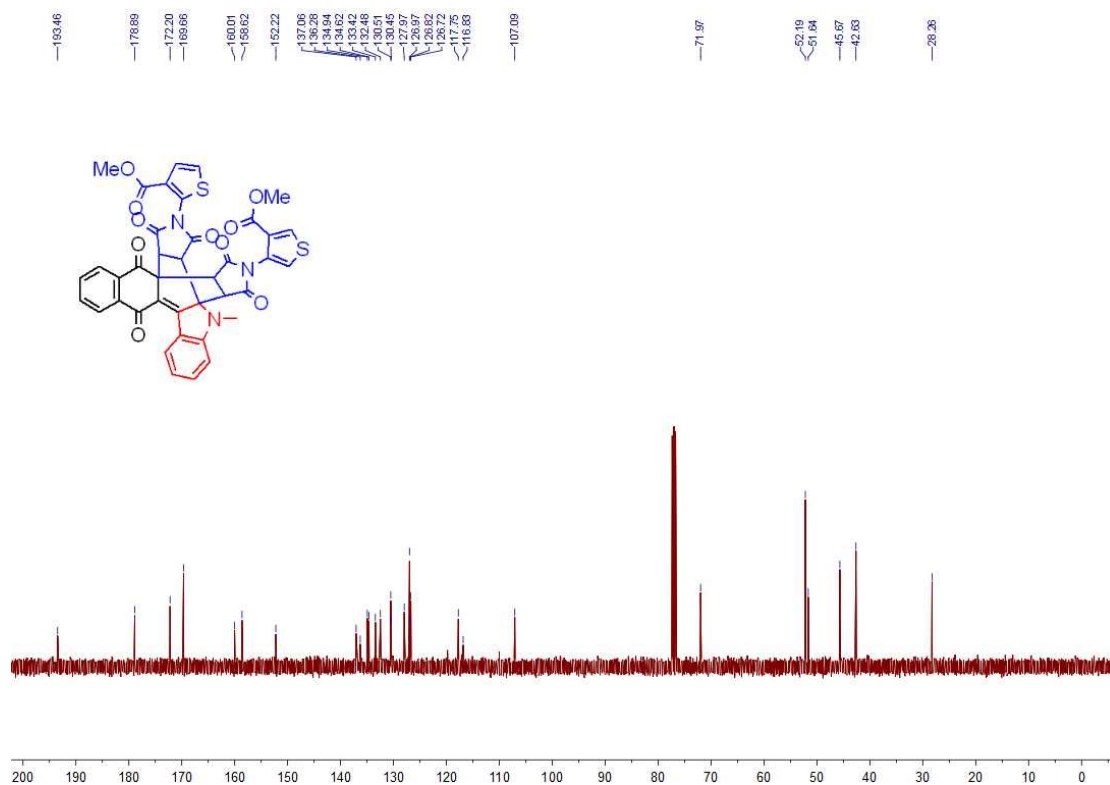

7,17-bis(2-(2,5-dioxo-2,5-dihydro-1H-pyrrol-1-yl)ethyl)-5-methyl-5b,8a-dihydro-

5H,6H-5a,8b-[3,4]epipyrrolonaphtho[2,3-c]pyrrolo[3,4-a]carbazole-  
6,8,9,14,16,18(7H)-hexaone (**5I**)

$^1\text{H}$  NMR (400 MHz)

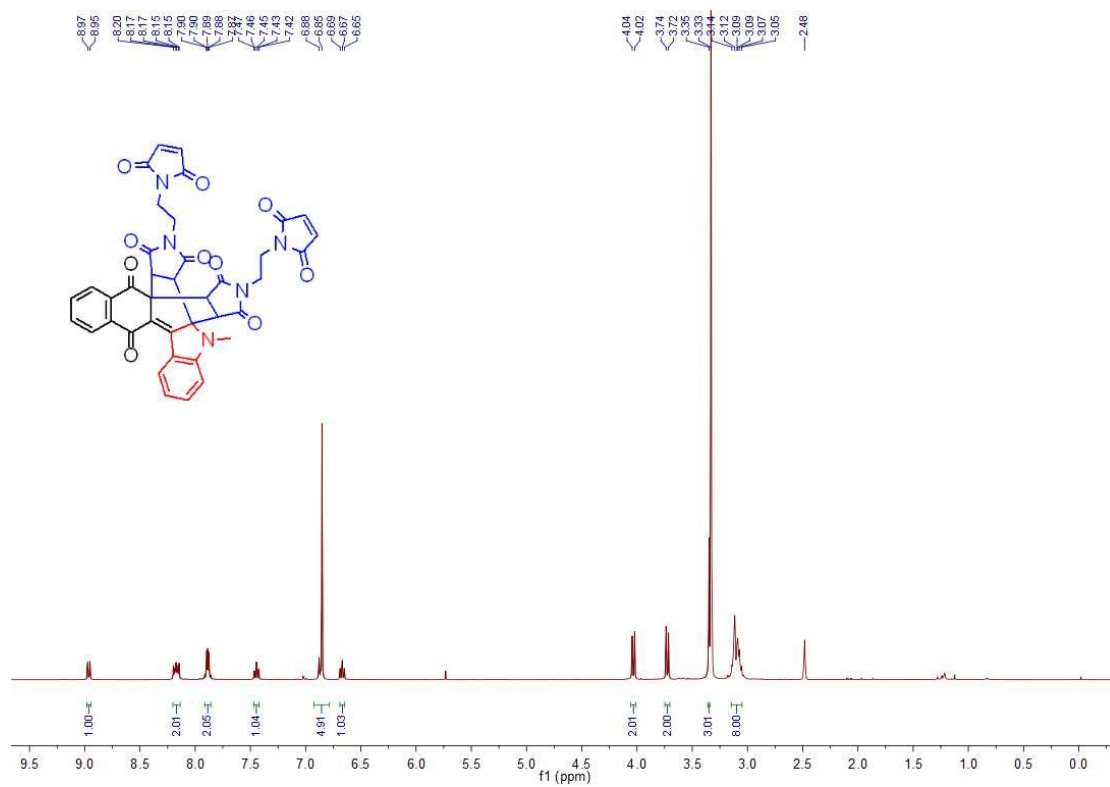

$^{13}\text{C}$  NMR (101 MHz)

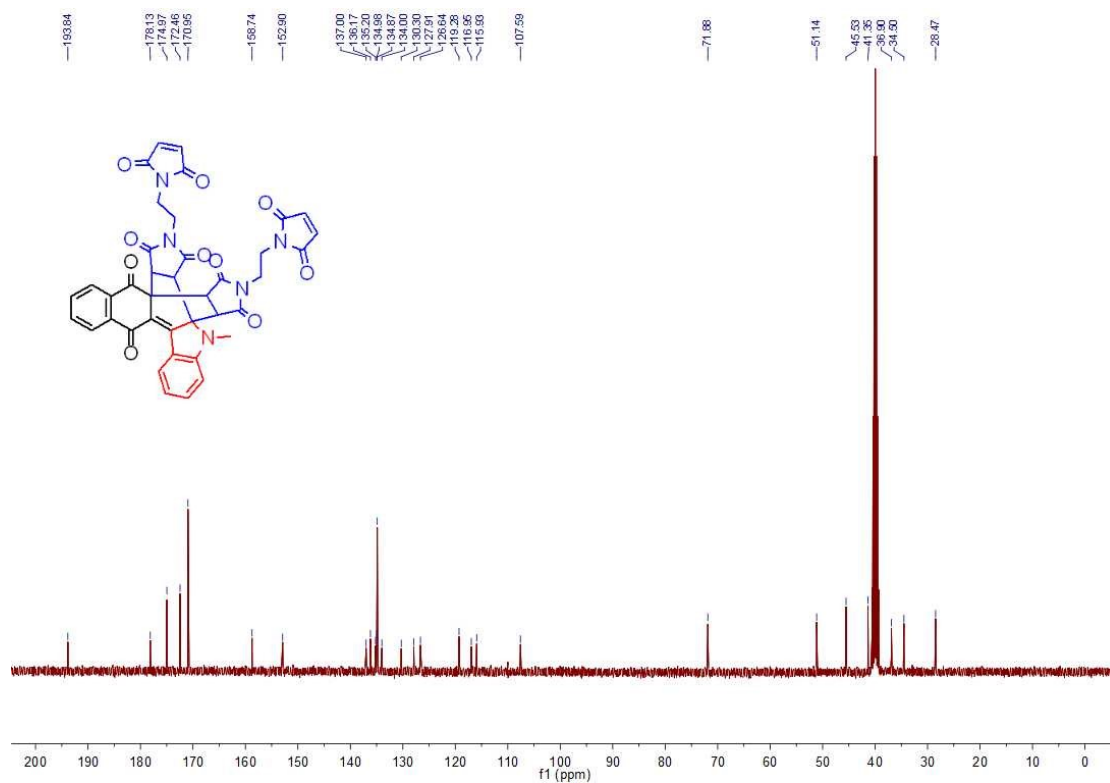

7,17-bis(2-(2-(2-methoxyethoxy)ethoxy)ethyl)-5-methyl-5b,8a-dihydro-5H,6H-5a,8b-[3,4]epipyrrolonaphtho[2,3-c]pyrrolo[3,4-a]carbazole-6,8,9,14,16,18(7H)-hexaone  
**(5m)**

$^1\text{H}$  NMR (400 MHz)

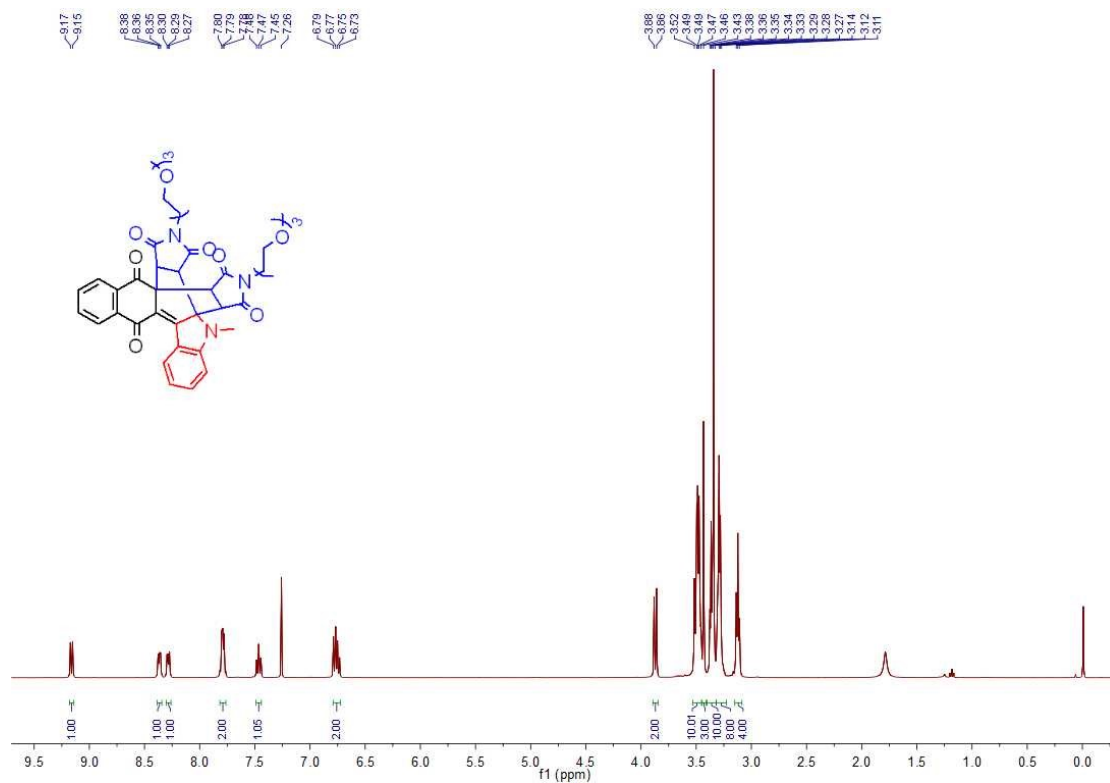

**<sup>13</sup>C NMR (101 MHz)**

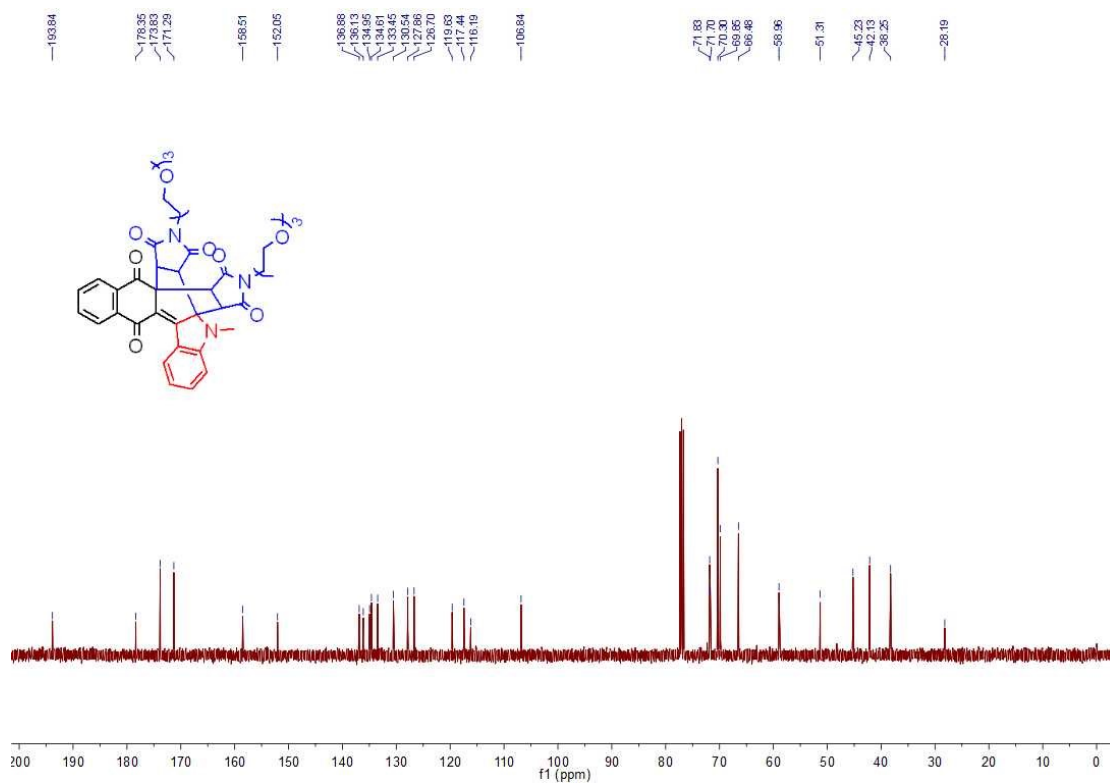

7-cyclohexyl-5-methyl-17-phenyl-5b,8a-dihydro-5H,6H-5a,8b-

[3,4]epipyrrolonaphtho[2,3-c]pyrrolo[3,4-a]carbazole-6,8,9,14,16,18(7H)-hexaone  
(5n)

<sup>1</sup>H NMR (400 MHz)

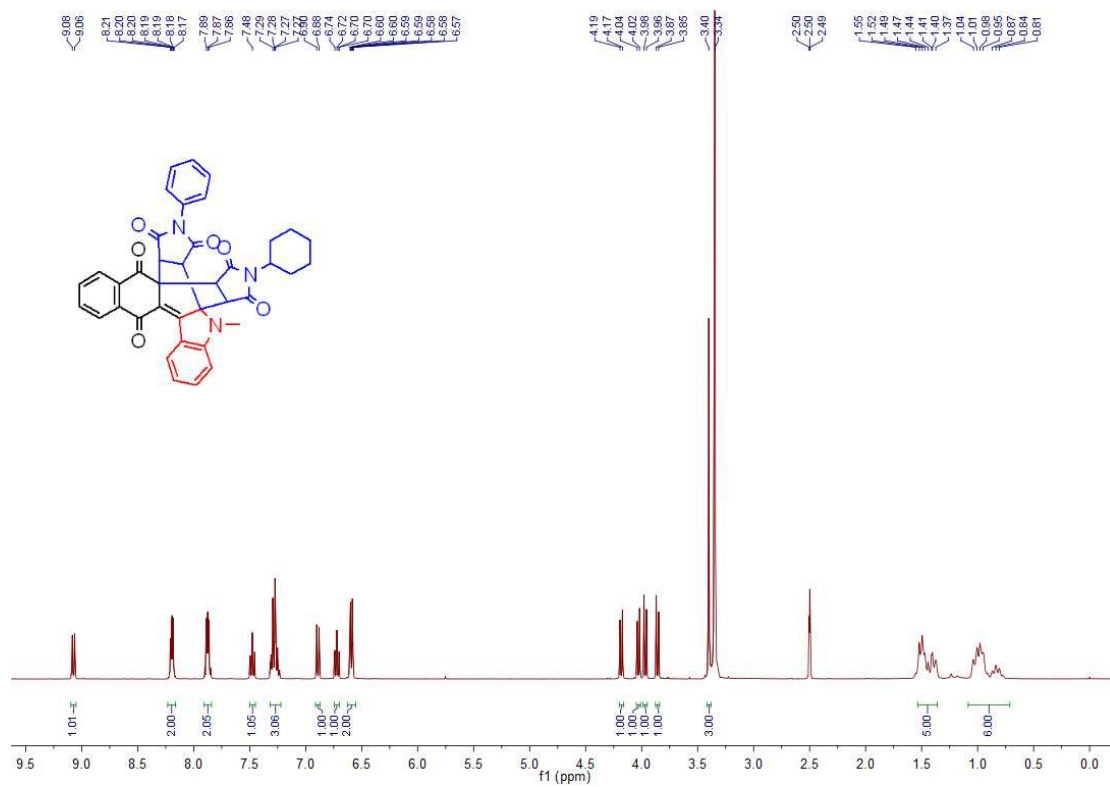

<sup>13</sup>C NMR (101 MHz)

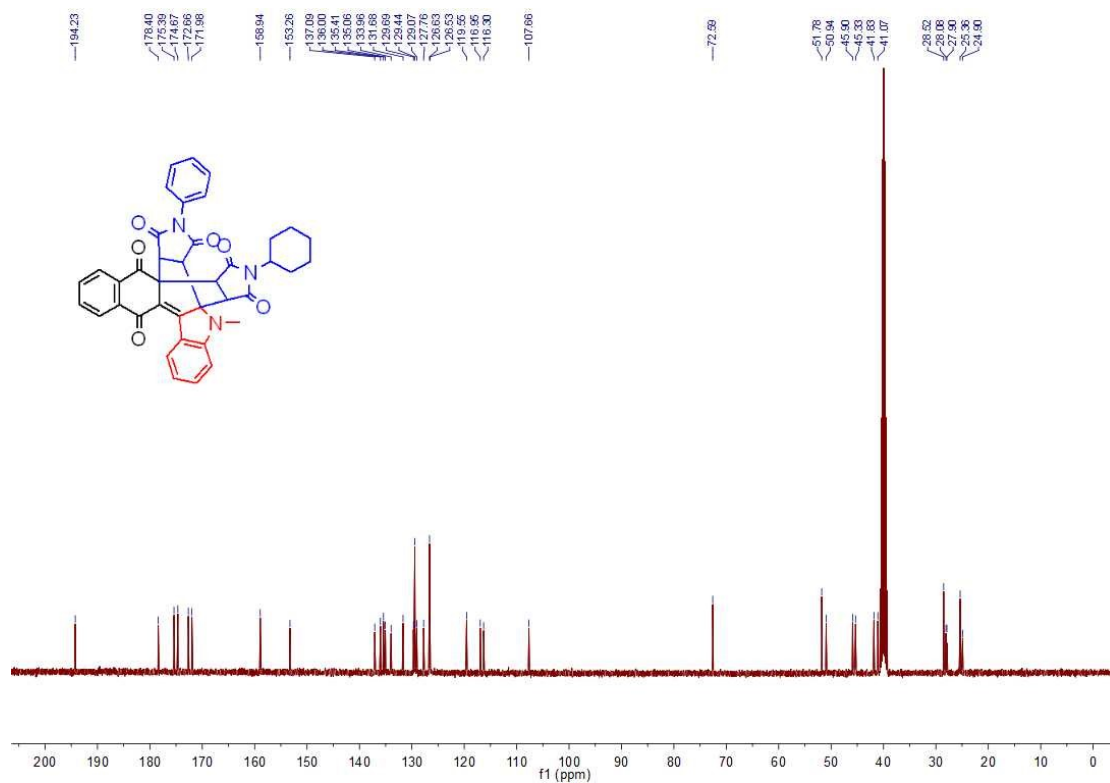

7-cyclohexyl-5-methyl-5b,8a-dihydro-5H,6H-5a,8b-[3,4]epipyrrolonaphtho[2,3-c]pyrrolo[3,4-a]carbazole-6,8,9,14,16,18(7H)-hexaone (**5o**)

$^1\text{H}$  NMR (400 MHz)



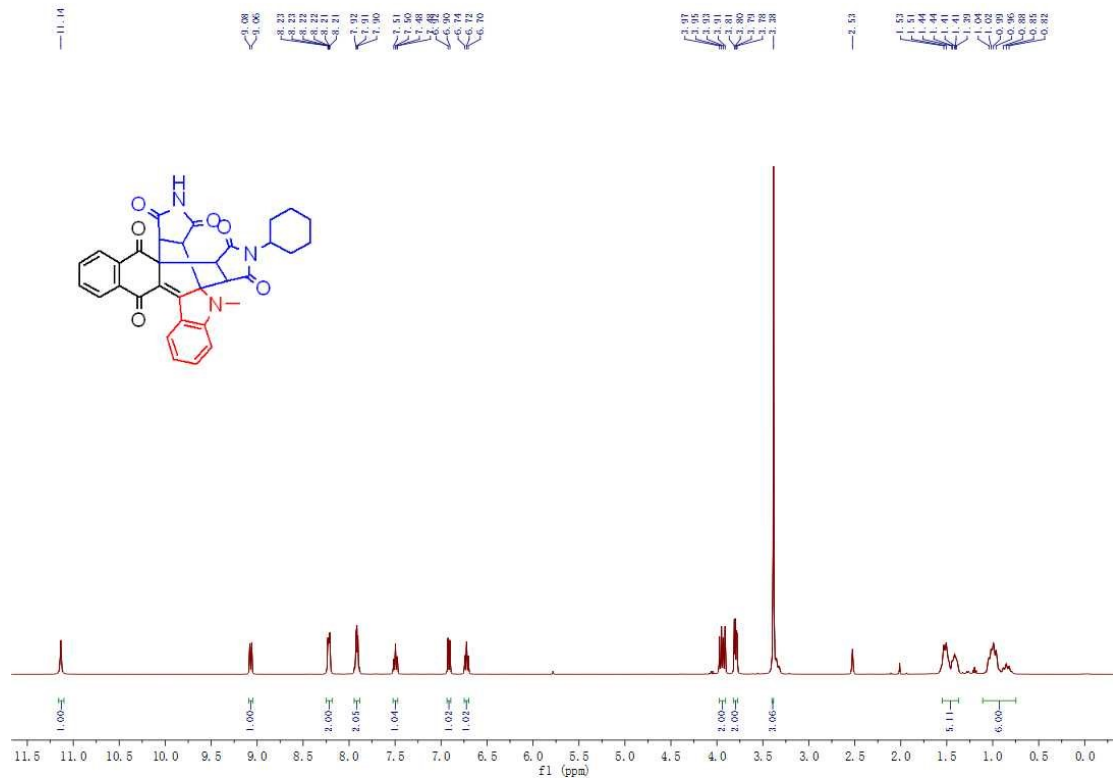

**<sup>13</sup>C NMR (101 MHz)**

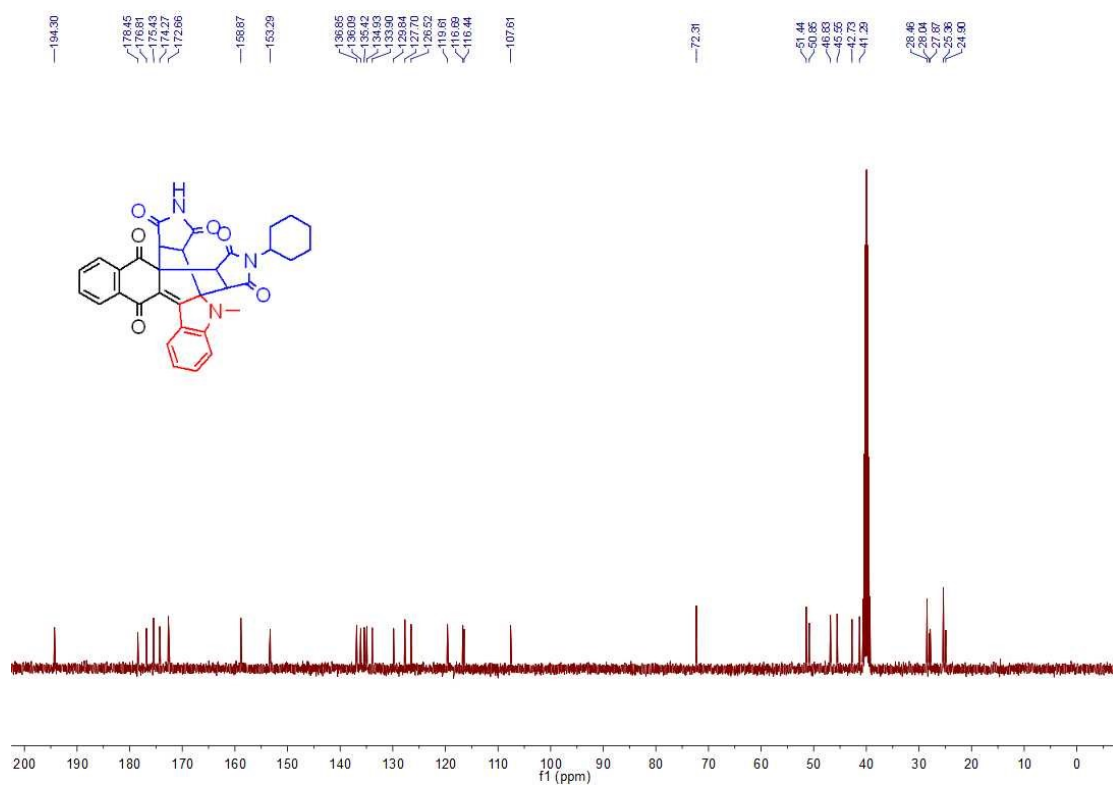

Supplement: d1qo01199e1.pdf [file d1qo01199e1.pdf]
